# Supplementary material
Source: PubMed Central journal article supplement (PMC4146673)

## SUPPLEMENTARY CONTENTS WITH TABLE AND FIGURE LEGENDS

### Supplementary Note (page 2 – 17).

*Part 1: Discussion of novel loci.*

*Part 2: Additional Acknowledgements and Funding*

*Part 3: Consortium Members*

**Supplementary Table 1 (page 18): Studies contributing to the discovery phase meta-analysis.\*** denotes genomic inflation estimates ( $\lambda$ ) scaled to 1000 cases and 1000 controls.

**Supplementary Table 2 (page 19): Additional details related to Table 1.** C - Chromosome; OR - odds ratio; I<sub>2</sub> – index of heterogeneity. \*replication genotyping for these SNPs failed assay design or quality control and a suitable proxy variant was selected (rs35749011, proxy rs71628662; rs1474055, proxy rs1955337; rs115185635, proxy rs62267708; rs117896735, proxy rs118117788; rs3793947, proxy rs12283611; rs1555399, proxy rs1077989; rs62120679, proxy rs10402629; rs8118008, proxy rs55785911). Note, only replication phase p-values are one-sided. Nearest gene or previously published proximal gene names included in table.

**Supplementary Table 3 (page 20): Additional details related to Table 2.** Replication genotyping for these SNPs failed assay design or quality control and a suitable proxy variant was selected (rs1596117, proxy rs4859430; rs7681154, proxy rs3910105; rs13201101, proxy rs8192591; based on discovery series comparison, the minor allele for rs3910105 tags the major allele of rs7681154 therefore risk is consistent across proxy and discovery SNP). Note, only replication phase p-values are one-sided. Nearest gene or previously published proximal gene names included in table.

**Supplementary Table 4 (page 21): Summary statistics for risk profile scoring analyses.**

**Supplementary Table 5 (page 22):** Genome-wide significant SNPs are associated with distinct changes in methylation and expression levels in proximal genomic regions across multiple brain regions.

**Supplementary Table 6 (page 23):** Minor allele frequencies for all SNPs in meta-analysis stratified by case-control status for discovery and replication phases. All replication samples were included in these estimates. Discovery phase estimates include all 23andMe samples, PGPD, HIHG, NGRC and all IPDGC samples except those from the UK and Iceland.

**Supplementary Figure 1 (pages 24 - 55):** Regional association plots. 32 regional association plots for SNPs from discovery phase analyses +/- 1 Mb from most significant SNP per locus in Table 1. The r<sup>2</sup> pattern is based on most significant SNP per locus, based on the 283 European ancestry samples from the August 2010 release of the 1000 genomes project dataset. Secondary signals are annotated in text as per their description in the conditional analysis section of Table 2. Recombination rates are as per HapMap phase 2 European ancestry samples. Nearest gene or previously published proximal gene names included in table.

**Supplementary Figure 2 (page 56 - 95):** Forest plots. 40 Forest plots of SNPs from discovery and conditional phases described in Tables 1 and 2. Nearest gene or previously published proximal gene names included in table.

**Supplementary Figure 3 (page 96):** QQ plot of p-values from discovery meta-analysis.

**Supplementary Figure 4 (page 97):** QQ plot of p-values from discovery meta-analysis excluding significant and replicated loci. All SNPs within +/- 1 megabase of a replicated genome-wide significant SNP were excluded (unadjusted  $\lambda$  = 1.045).

**Supplementary Figure 5 (page 98):** ROC curve for genetic risk profiles across cohorts adjusting for cohort membership, age and gender.

## SUPPLEMENTARY NOTE

### *Part 1: Discussion of novel loci.*

The six novel loci we have identified (*SIPA1L2*, *INPP5F*, *MIR4697*, *GCH1*, *VPS13C*, and *DDRKG1*) in this meta-analysis include biologically plausible connections to PD etiology based on previous research. In the context of GWAS it is clear that the pathobiologically relevant gene is not always the closest or most obvious proximal candidate.<sup>1</sup> However, it is perhaps useful to discuss the potential pathobiological relevance of the candidate genes at our loci, with the caveat that further work is required to identify whether these are the true biological candidates. The signal-induced proliferation-associated 1 like 2 (*SIPA1L2*) locus has been implicated in inflammatory pathways by GWAS as well as in pharmacogenetic studies of smoking cessation and related behaviors.<sup>2,3</sup> *INPP5F* has been suggested as an initial candidate locus for late-onset Alzheimer's disease from linkage studies.<sup>4</sup> *MIR4697* is a provisional microRNA identified in next generation sequencing studies of breast cancer.<sup>5</sup> GTP cyclohydrolase 1 (*GCH1*) is a likely biological candidate for future therapeutics and follow-up study, as SNPs at this locus are also associated with dopamine clearance in urine.<sup>6</sup> In addition, the *GCH1* locus has been offered as a risk locus in early onset and atypical PD, but results until this point have never been definitive.<sup>7-9</sup> The locus containing rs2414739 and the *VPS13C* gene possesses a likely connection to neurodegenerative disease etiology as alternative splicing of *VPS13C* contributes to risk of congenital myasthenic syndrome.<sup>10</sup> *DDRKG1* is also connected to neurodegenerative disease as it has been suggested as a candidate locus for spinocerebellar ataxias.<sup>11</sup>

1. Smemo, S. *et al.* Obesity-associated variants within FTO form long-range functional connections with IRX3. *Nature* **507**, 371–375 (2014).
2. Rose, J. E., Behm, F. M., Drgon, T., Johnson, C. & Uhl, G. R. Personalized smoking cessation: interactions between nicotine dose, dependence and quit-success genotype score. *Mol. Med. Camb. Mass* **16**, 247–253 (2010).
3. Ferreira, R. C. *et al.* Association of IFIH1 and other autoimmunity risk alleles with selective IgA deficiency. *Nat. Genet.* **42**, 777–780 (2010).
4. Grupe, A. *et al.* A scan of chromosome 10 identifies a novel locus showing strong association with late-onset Alzheimer disease. *Am. J. Hum. Genet.* **78**, 78–88 (2006).
5. Persson, H. *et al.* Identification of new microRNAs in paired normal and tumor breast tissue suggests a dual role for the ERBB2/Her2 gene. *Cancer Res.* **71**, 78–86 (2011).
6. Comuzzie, A. G. *et al.* Novel genetic loci identified for the pathophysiology of childhood obesity in the Hispanic population. *PloS One* **7**, e51954 (2012).
7. Hertz, J. M. *et al.* Low frequency of Parkin, Tyrosine Hydroxylase, and GTP Cyclohydrolase I gene mutations in a Danish population of early-onset

Parkinson's Disease. *Eur. J. Neurol. Off. J. Eur. Fed. Neurol. Soc.* **13**, 385–390 (2006).

8. Cobb, S. A. *et al.* GCH1 in early-onset Parkinson's disease. *Mov. Disord. Off. J. Mov. Disord. Soc.* **24**, 2070–2075 (2009).
9. Bandmann, O., Daniel, S., Marsden, C. D., Wood, N. W. & Harding, A. E. The GTP-cyclohydrolase I gene in atypical parkinsonian patients: a clinico-genetic study. *J. Neurol. Sci.* **141**, 27–32 (1996).
10. Masuda, A. *et al.* hnRNP H enhances skipping of a nonfunctional exon P3A in CHRNA1 and a mutation disrupting its binding causes congenital myasthenic syndrome. *Hum. Mol. Genet.* **17**, 4022–4035 (2008).
11. Kobayashi, H. *et al.* Expansion of intronic GGCCTG hexanucleotide repeat in NOP56 causes SCA36, a type of spinocerebellar ataxia accompanied by motor neuron involvement. *Am. J. Hum. Genet.* **89**, 121–130 (2011).

### *Part 2: Additional Acknowledgements and Funding*

This work was supported in part by the Intramural Research Programs of the National Institute of Neurological Disorders and Stroke (NINDS), the National Institute on Aging (NIA), and the National Institute of Environmental Health Sciences both part of the National Institutes of Health, Department of Health and Human Services; project numbers Z01-AG000949-02 and Z01-ES101986. In addition this work was supported by the Department of Defense (award W81XWH-09-2-0128), and The Michael J Fox Foundation for Parkinson's Research. This work was supported by National Institutes of Health grants R01NS037167, R01CA141668, P50NS071674, American Parkinson Disease Association (APDA); Barnes Jewish Hospital Foundation; Greater St Louis Chapter of the APDA; Hersenstichting Nederland; Neuroscience Campus Amsterdam; and the section of medical genomics, the Prinses Beatrix Fonds. The KORA (Cooperative Research in the Region of Augsburg) research platform was started and financed by the Forschungszentrum für Umwelt und Gesundheit, which is funded by the German Federal Ministry of Education, Science, Research, and Technology and by the State of Bavaria. This study was also funded by the German National Genome Network (NGFNplus number 01GS08134, German Ministry for Education and Research); by the German Federal Ministry of Education and Research (NGFN 01GR0468, PopGen); and 01EW0908 in the frame of ERA-NET NEURON and Helmholtz Alliance Mental Health in an Ageing Society (HA-215), which was funded by the Initiative and Networking Fund of the Helmholtz Association. The French GWAS work was supported by the French National Agency of Research (ANR-08-MNP-012). This study was also funded by France-Parkinson Association, the French program "Investissements d'avenir" funding (ANR-10-IAIHU-06) and a grant from Assistance Publique-Hôpitaux de Paris (PHRC, AOR-08010) for the French clinical data. This study was also sponsored by the Landspítali University Hospital Research Fund (grant to SSv); Icelandic Research Council (grant to SSv); and European Community Framework Programme 7, People Programme, and IAPP on novel genetic and phenotypic markers of Parkinson's disease and Essential Tremor (MarkMD),

contract number PIAP-GA-2008-230596 MarkMD (to HP and JHu). This study utilized the high-performance computational capabilities of the Biowulf Linux cluster at the National Institutes of Health, Bethesda, Md. (<http://biowulf.nih.gov>), and DNA panels, samples, and clinical data from the National Institute of Neurological Disorders and Stroke Human Genetics Resource Center DNA and Cell Line Repository. People who contributed samples are acknowledged in descriptions of every panel on the repository website. We thank the French Parkinson's Disease Genetics Study Group and the Drug Interaction with genes (DIGPD) study group: Y Agid, M Anheim, A-M Bonnet, M Borg, A Brice, E Broussolle, J-C Corvol, P Damier, A Destée, A Dürr, F Durif, A Elbaz, D Grabil, S Klebe, P. Krack, E Lohmann, L. Lacomblez, M Martinez, V Mesnage, P Pollak, O Rascol, F Tison, C Tranchant, M Vérin, F Viallet, and M Vidailhet. We also thank the members of the French 3C Consortium: A Alperovitch, C Berr, C Tzourio, and P Amouyel for allowing us to use part of the 3C cohort, and D Zelenika for support in generating the genome-wide molecular data. We thank P Tienari (Molecular Neurology Programme, Biomedicum, University of Helsinki), T Peuralinna (Department of Neurology, Helsinki University Central Hospital), L Myllykangas (Folkhalsan Institute of Genetics and Department of Pathology, University of Helsinki), and R Sulkava (Department of Public Health and General Practice Division of Geriatrics, University of Eastern Finland) for the Finnish controls (Vantaa85+ GWAS data). We used genome-wide association data generated by the Wellcome Trust Case-Control Consortium 2 (WTCCC2) from UK patients with Parkinson's disease and UK control individuals from the 1958 Birth Cohort and National Blood Service. Genotyping of UK replication cases on ImmunoChip was part of the WTCCC2 project, which was funded by the Wellcome Trust (083948/Z/07/Z). UK population control data was made available through WTCCC1. This study was supported by the Medical Research Council and Wellcome Trust disease centre (grant WT089698/Z/09/Z to NW, JHa, and ASc). As with previous IPDGC efforts, this study makes use of data generated by the Wellcome Trust Case-Control Consortium. A full list of the investigators who contributed to the generation of the data is available from [www.wtccc.org.uk](http://www.wtccc.org.uk). Funding for the project was provided by the Wellcome Trust under award 076113, 085475 and 090355. This study was also supported by Parkinson's UK (grants 8047 and J-0804) and the Medical Research Council (G0700943). We thank Jeffrey Barrett for assistance with the design of the ImmunoChip. DNA extraction work that was done in the UK was undertaken at University College London Hospitals, University College London, who received a proportion of funding from the Department of Health's National Institute for Health Research Biomedical Research Centres funding. This study was supported in part by the Wellcome Trust/Medical Research Council Joint Call in Neurodegeneration award (WT089698) to the Parkinson's Disease Consortium (UKPDC), whose members are from the UCL Institute of Neurology, University of Sheffield, and the Medical Research Council Protein Phosphorylation Unit at the University of Dundee.

We would like to thank the NINDS sponsored Neurogenetics Repository hosted by Coriell Cell Repositories for the use of both case and control samples.

The work performed by the North American Brain Expression Consortium (NABEC) was supported in part by the Intramural Research Program of the National Institute on Aging, National Institutes of Health, part of the US Department of Health and Human Services; project number Z01 AG000932-04. In addition this work was supported by a Research Grant from the Department of Defense, W81XWH-09-2-0128. This study utilized the high-performance computational capabilities of the Biowulf Linux cluster at the National Institutes of Health, Bethesda, Md. (<http://biowulf.nih.gov>). This work performed by the UK Brain Expression Consortium (UKBEC) was supported by the MRC through the MRC Sudden Death Brain Bank (C.S.), by a Project Grant (G0901254 to J.H. and M.W.) and by a Fellowship award (G0802462 to M.R.). D.T. was supported by the King Faisal Specialist Hospital and Research Centre, Saudi Arabia. Computing facilities used at King's College London were supported by the National Institute for Health Research (NIHR) Biomedical Research Centre based at Guy's and St Thomas' NHS Foundation Trust and King's College London. We would like to thank AROS Applied Biotechnology AS company laboratories and Affymetrix for their valuable input.

This work was also supported by National Institutes of Health grants NS050487 (Clark), NS060113 (Clark) and NS036630 (Marder) ,2UL1 RR024156 (Marder) and the Parkinson's Disease Foundation (Clark/Marder).

This work has also been made possible by the kind support of The Michael J. Fox Foundation for Parkinson's Research with additional support from Cure Alzheimer's Fund (CAF), Prize4Life, the National Alliance for Research on Schizophrenia and Depression (NARSAD), and EMD Serono (to Lars Bertram). Christina M. Lill has been supported by the Fidelity Biosciences Research Initiative. Haydeh Payami was supported by National Institutes of Health R01-NS-36960.

This study was supported by the Parkinson's disease foundation (PDF) (GX, HH) We would like to thank Mark Gaskin for help with sample organisation and aliquoting.

This study was supported in part by Research Committee, University of Thessaly (code 2845; PI: GMH). We would like to thank Maria Dardioti for help with sample organisation and aliquoting. This study was supported by the Parkinson's disease foundation (PDF) (GX, HH). This study was supported by the Parkinson's disease foundation (PDF) (CS). This study was supported in part by Research Grant "Sinergasia" awarded to LS from the Hellenic Secretariat of Research and Technology, as well as a Research Grant from GlaxoSmithKline Greece.

This work was supported by the National Heart, Lung and Blood Institute's Framingham Heart Study (Contract No. N01-HC-25195) and its contract with Affymetrix, Inc for genotyping services (Contract No. N02-HL-6-4278) This study was also supported by grants from the National Institute of Neurological Disorders and Stroke (NS17950) and the National Institute of Aging (AG08122,

AG16495, AG033193, AG031287, P30AG013846, and AG025259) and an unrestricted grant to the Framingham study from the Bumpus foundation.

Cardiovascular Health Study (CHS): This CHS research was supported by NHLBI contracts HHSN268201200036C, HHSN268200800007C, N01HC55222, N01HC85079, N01HC85080, N01HC85081, N01HC85082, N01HC85083, N01HC85086; and NHLBI grants HL080295, HL087652, HL105756, HL103612, and HL120393 with additional contribution from the National Institute of Neurological Disorders and Stroke (NINDS). Additional support was provided through AG023629 and P30AG024826 from the National Institute on Aging (NIA), 1K23NS070867 (NINDS), and 1KL2RR024154 (National Center for Research Resources). A full list of principal CHS investigators and institutions can be found at CHS-NHLBI.org.

The provision of genotyping data was supported in part by the National Center for Advancing Translational Sciences, CTSI grant UL1TR000124, and the National Institute of Diabetes and Digestive and Kidney Disease Diabetes Research Center (DRC) grant DK063491 to the Southern California Diabetes Endocrinology Research Center.

The content is solely the responsibility of the authors and does not necessarily represent the official views of the National Institutes of Health.

Funding was obtained through the Internationaal Parkinson Fonds, Netherlands Consortium for Healthy Aging, Netherlands Organization for Scientific Research (NWO), Netherlands Organization for Health Research and Development (ZonMW), Research Institute for Diseases in the Elderly (RIDE)

The Oxford Brain Bank is supported by grants from the Medical Research Council (OA), Brains for Dementia Research (Alzheimer Brain Bank UK) (OA) and in part by the National Institute for Health Research (NIHR) Oxford Biomedical Research Centre based at Oxford University Hospitals NHS Trust and University of Oxford (OA). The views expressed are those of the authors and not necessarily those of the NHS, the NIHR or the Department of Health. LP is supported by the Discovery Award from Parkinson's UK.

### *Part 3: Consortium Members*

#### **IPDGC consortium members and affiliations:**

Mike A Nalls, 1; Vincent Plagnol, 45; Dena G Hernandez, 1, 6; Manu Sharma, 15, 109; Una-Marie Sheerin, 13; Mohamad Saad, 46, 9; Javier Simón-Sánchez, 47; Claudia Schulte, 15; Suzanne Lesage, 104, 48, 227; Sigurlaug Sveinbjörnsdóttir, 49, 50, 231; Sampath Arepalli, 1; Roger Barker, 51; Yoav Ben-Shlomo, 52; Henk W Berendse, 53; Daniela Berg, 15, 109; Kailash Bhatia, 54; Rob M A de Bie, 55;

Alessandro Biffi, 56, 108; Bas Bloem, 57; Zoltan Bochdanovits, 47; Michael Bonin, 58; Jose M Bras, 13; Kathrin Brockmann, 15, 109; Janet Brooks, 1; David J Burn, 59; Gavin Charlesworth, 13; Honglei Chen, 38; Patrick F Chinnery, 60; Sean Chong, 1; Carl E Clarke, 61, 106; Mark R Cookson, 1; J Mark Cooper, 62; Jean Christophe Corvol, 104, 204, 48, 227; Carl Counsell, 63; Philippe Damier, 64; Jean-François Dartigues, 65; Panos Deloukas, 66; Günther Deuschl, 67; David T Dexter, 68; Karin D van Dijk, 53; Allissa Dillman, 1; Frank Durif, 69; Alexandra Dürr, 104, 42, 48, 227; Sarah Edkins, 66; Jonathan R Evans, 70; Thomas Foltynie, 71; Jing Dong, 38; Michelle Gardner, 13; J Raphael Gibbs, 1, 13; Alison Goate, 26, 28, 29, 30; Emma Gray, 66; Rita Guerreiro, 13; Clare Harris, 72; Jacobus J van Hilten, 73; Albert Hofman, 20; Albert Hollenbeck, 74; Janice Holton, 75; Michele Hu, 76; Xuemei Huang, 77; Isabel Wurster, 15; Walter Mätzler, 15; Gavin Hudson, 232; Sarah E Hunt, 66; Johanna Huttenlocher, 16; Thomas Illig, 78; Pálmi V Jónsson, 79; Jean-Charles Lambert, 80, 105; Cordelia Langford, 70; Andrew Lees, 75; Peter Lichtner, 81; Patricia Limousin, 82; Grisel Lopez, 83; Delia Lorenz, 67; Alisdair McNeill, 62; Catriona Moorby, 61; Matthew Moore, 1; Huw R Morris, 84; Karen E Morrison, 61, 107; Ese Mudanohwo, 85; Sean S O'Sullivan, 75; Justin Pearson, 84; Joel S Perlmutter, 86; Hjörvar Pétursson, 16, 58; Pierre Pollak, 87; Bart Post, 57; Simon Potter, 66; Bernard Ravina, 88; Tamas Revesz, 75; Olaf Riess, 58; Fernando Rivadeneira, 89, 90; Patrizia Rizzu, 47; Mina Ryten, 13; Stephen Sawcer, 91; Anthony Schapira, 62; Hans Scheffer, 92; Karen Shaw, 75; Ira Shoulson, 93; Ellen Sidransky, 83; Colin Smith, 95; Chris C A Spencer, 96; Hreinn Stefánsson, 16; Francesco Bettella, 16; Joanna D Stockton, 61; Amy Strange, 96; Kevin Talbot, 97; Carlie M Tanner, 98; Avazeh Tashakkori-Ghanbaria, 66; François Tison, 99; Daniah Trabzuni, 13, 215; Bryan J Traynor, 1; André G Uitterlinden, 89, 90; Daan Velseboer, 55; Marie Vidailhet, 104, 48, 227; Robert Walker, 95; Bart van de Warrenburg, 57; Mirdhu Wickremaratchi, 203; Nigel Williams, 84; Caroline H Williams-Gray, 51; Sophie Winder-Rhodes, 100, 101, 102; Kári Stefánsson, 16; Maria Martinez, 103, 9; Nicholas W Wood, 45, 13; John Hardy, 13; Peter Heutink, 47; Alexis Brice, 104, 48, 228, 227; Thomas Gasser, 15, 109; Andrew B Singleton, 1.

### **PSG-PROGENI Investigators and Coordinators**

S Factor, 110; D Higgins, 110; S Evans, 110; H Shill, 111; M Stacy, 111; J Danielson, 111; L Marlor, 111; K Williamson, 111; J Jankovic, 112; C Hunter, 112; D Simon, 113; P Ryan, 113; L Scollins, 113; R Saunders-Pullman, 113; K Boyar, 113; C Costan-Toth, 113; E Ohmann, 113; L Sudarsky, 114; C Joubert, 114; J Friedman, 115; K Chou, 115; H Fernandez, 115; M Lannon, 115; N Galvez-Jimenez, 174; A Podichetty, 174; K Thompson, 174; P Lewitt, 229; M

DeAngelis, 229; C O'Brien, 116; L Seeberger, 116; C Dingmann, 116; D Judd, 116; K Marder, 117; J Fraser, 117; J Harris, 117; J Bertoni, 118; C Peterson, 118; M Rezak, 119; G Medalle, 119; S Chouinard, 120; M Panisset, 120; J Hall, 120; H Poiffaut, 120; V Calabrese, 121; P Roberge, 121; J Wojcieszek, 122; J Belden, 122; D Jennings, 123; K Marek, 123; S Mendick, 123; S Reich, 124; B Dunlop, 124; M Jog, 125; C Horn, 125; R Uitti, 126; M Turk, 126; T Ajax, 127; J Manner, 127; K Sethi, 128; J Carpenter, 128; B Dill, 128; L Hatch, 128; K Ligon, 128; S Narayan, 128; K Blindauer, 129; K Abou-Samra, 129; J Petit, 129; L Elmer, 130; E Aiken, 130; K Davis, 130; C Schell, 130; S Wilson, 130; M Velickovic, 131; W Koller, 131; S Phipps, 131; A Feigin, 132; M Gordon, 132; J Hamann, 132; E Licari, 132; M Marotta-Kollarus, 132; B Shannon, 132; R Winnick, 132; T Simuni, 133; A Videnovic, 133; A Kaczmarek, 133; K Williams, 133; M Wolff, 133; J Rao, 134; M Cook, 134; M Fernandez, 135; S Kostyk, 135; J Hubble, 135; A Campbell, 135; C Reider, 135; A Seward, 135; R Camicioli, 188; J Carter, 188; J Nutt, 188; P Andrews, 188; S Morehouse, 188; C Stone, 188; T Mendis, 136; D Grimes, 136; C Alcorn-Costa, 136; P Gray, 136; K Haas, 136; J Vendette, 136; J Sutton, 137; B Hutchinson, 137; J Young, 137; A Rajput, 138; A Rajput, 138; L Klassen, 138; T Shirley, 138; B Manyam, 139; P Simpson, 139; J Whetteckey, 139; B Wulbrecht, 139; D Truong, 140; M Pathak, 140; K Frei, 140; N Luong, 140; T Tra, 140; A Tran, 140; J Vo, 140; A Lang, 141; G Kleiner-Fisman, 141; A Nieves, 141; L Johnston, 141; J So, 141; G Podskalny, 142; L Giffin, 142; P Atchison, 143; C Allen, 143; W Martin, 144; M Wieler, 144; O Suchowersky, 145; S Furtado, 145; M Klimek, 145; N Hermanowicz, 146; S Niswonger, 146; C Shults, 147; D Fontaine, 147; M Aminoff, 148; C Christine, 148; M Diminno, 148; J Hevezi, 148; A Dalvi, 149; U Kang, 149; J Richman, 149; S Uy, 149; J Young, 149; A Dalvi, 150; A Sahay, 150; M Gartner, 150; D Schwieterman, 150; D Hall, 151; M Leehey, 151; S Culver, 151; T Derian, 151; T Demarcaida, 152; S Thurlow, 152; R Rodnitzky, 152; J Dobson, 152; K Lyons, 154; R Pahwa, 154; T Gales, 154; S Thomas, 154; L Shulman, 155; S Reich, 155; W Weiner, 155; K Dustin, 155; K Lyons, 156; C Singer, 156; W Koller, 156; W Weiner, 156; L Zelaya, 156; P Tuite, 157; V Hagen, 157; S Rolandelli, 157; R Schacherer, 157; J Kosowicz, 157; P Gordon, 158; J Werner, 158; C Serrano, 159; S Roque, 159; R Kurlan, 160; D Berry, 160; I Gardiner, 160; R Hauser, 161; J Sanchez-Ramos, 161; T Zesiewicz, 161; H Delgado, 161; K Price, 161; P Rodriguez, 161; S Wolfrath, 161; R Pfeiffer, 162; L Davis, 162; B Pfeiffer, 162; R Dewey, 163; B Hayward, 163; A Johnson, 163; M Meacham, 163; B Estes, 163; F Walker, 164; V Hunt, 164; C O'Neill, 164; B Racette, 165; L Swisher, 165.

**23andMe**



Cheri Dijamco, 5; Emily Drabant Conley, 5; Elizabeth Dorfman, 5; Joyce Y Tung, 5; David A Hinds, 5; Joanna L Mountain, 5; Anne Wojcicki, 5.

**GenePD Investigators and Coordinators:**

M Lew, 166; O Suchowersky, 145; C Klein, 167; L Golbe, 168; J Growdon, 169; GF Wooten, 170; R Watts, 143; M Guttman, 171; B Racette, 234; L Marlor, 111; H Shill, 172; C Singer, 156; S Goldwurm, 173; MH Saint-Hilaire, 233; K Baker, 174; I Litvan, 175; G Nicholson, 176; M Nance, 177; E Drasby, 178; S Isaacson, 179; D Burn, 180; P Pramstaller, 181; J Al-hinti, 182; A Moller, 183; S Sherman, 184; R Roxburgh, 185; J Slevin, 186; J Perlmutter, 234; MH Mark, 168; N Huggins, 169; G Pezzoli, 173; T Massood, 233; I Itin, 174; A Corbett, 176; P Chinnery, 180; K Ostergaard, 183; B Snow, 185; F Cambi, 186.

**NGRC Investigators and Coordinators:**

D Kay, 39; A Samii, 187; J Nutt, 188; P Agarwal, 189; JW Roberts, 190; DS Higgins, 191; Eric Molho, 191; Ami Rosen, 192; J Montimurro, 39; E Martinez, 187; A Griffith, 189; V Kusel, 39; D Yearout, 187.

**The Ashkenazi Jewish Dataset**

LN Clark, 205, 18, ; X Liu, 205; JH Lee, 117, 18, ; R Cheng Taub, 117, 18, ; K Marder, 206, 117, 18; ED Louis, 206, 117, 18; LJ Cote, 206, 117, 18; C Waters, 194; B Ford, 194; S Fahn, 194.

**HIHG Investigators and Coordinators:**

Jeffery M. Vance, 195, 196; Gary W. Beecham, 195, 196; Eden R. Martin, 195, 196; Karen Nuytemans, 195, 196; Margaret A. Pericak-Vance, 195, 196; Jonathan L. Haines, 207.

**CHARGE**

Anita DeStefano, 10, 11, 12; Sudha Seshadri, 12; Seung Hoan Choi, 12; Samuel Frank, 12; Joshua C. Bis, 25; Bruce M Psaty, 25, 198, 199, 200; Kenneth Rice, 7; WT Longstreth, Jr, 94, 198; Thanh G.N. Ton, 94; Samay Jain, 201; ; M. Arfan Ikram, 20, 21, 22; Cornelia M. van Duijn, 20; Albert Hofman, 20; André G. Uitterlinden, 202; Vincent J. Verlinden, 20; Peter J. Koudstaal, 22.

**North American Brain Expression Consortium Members and Affiliations:**

Andrew Singleton, 1; Mark Cookson, 1; J. Raphael Gibbs, 1, 6; Dena Hernandez, 1, 6; Allissa Dillman, 1, 213; Michael Nalls, 1; Alan Zonderman, 208; Sampath Arepalli, 1; Luigi Ferrucci, 209; Robert Johnson, 210; Dan Longo, 211; Richard

O'Brien, 212; Bryan Traynor, 1; Juan Troncoso, 212; Marcel van der Brug, 1; Ronald Zielke, 210.

**United Kingdom Brain Expression Consortium Members and Affiliations:**

John Hardy, 6; Michael Weale, 226; Mina Ryten, 6; Adaikalavan Ramasamy, 226, 6; Daniah Trabzuni, 6, 215; Colin Smith, 214; Robert Walker, 214.

**Greek Parkinson's Disease Consortium**

Eleanna Kara, 13; Georgia Xiromerisiou, 24, 36; Efthimios Dardiotis, 24; Vana Tsimourtou, 230; Cleanthe Spanaki, 216; Andreas Plaitakis, 216; Maria Bozi, 217, 221, 218; Leonidas Stefanis, 218, 222; Dimitris Vassilatis, 219; Georgios Koutsis, 220; Marios Panas, 220; Henry Houlden, 13; Georgios M. Hadjigeorgiou, 24.

**The Alzheimer Genetic Analysis Group Investigators are:**

Rita Guerreiro, 6, 13; Katie Lunnon, 223; Michelle Lupton, 223; John Powell, 223; Laura Parkkinen, 224; Olaf Ansorge, 224, 225; John Hardy, 6, 13.

**Affiliations**

- 1 - Laboratory of Neurogenetics, National Institute on Aging, Bethesda, MD 20892.
- 2 - Department of Laboratory Medicine and Pathology, University of Minnesota, Minneapolis, MN 55455.
- 3 - Neuropsychiatric Genetics Group, Department of Vertebrate Genomics, Max Planck Institute for Molecular Genetics, Berlin, Germany.
- 4 - Department of Neurology, Focus Program Translational Neuroscience, University Medical Center of the Johannes Gutenberg University Mainz, Mainz, Germany.
- 5 - 23andMe, Inc., Mountain View, California, USA.
- 6 - Reta Lila Weston Institute, University College London Institute of Neurology, Queen Square, London, United Kingdom, WC1N 3BG.
- 7 - Department of Biostatistics, University of Washington, Seattle, WA 8195-9460.
- 8 - Institut National de la Sante et de la Recherche Medicale, UMR 1043, Centre de Physiopathologie de Toulouse-Purpan, Toulouse, France.
- 9 - Paul Sabatier University, Toulouse, France.
- 10 - Department of Neurology, Boston University School of Medicine, Boston, MA, USA.
- 11 - Department of Biostatistics, Boston University School of Public Health, Boston, MA 02118, USA.
- 12 - NHLBI's Framingham Heart Study, Framingham, MA, USA.
- 13 - Department of Molecular Neuroscience, Institute of Neurology, University College London, London, United Kingdom, WC1N 3BG.

- 14 - Institute for Clinical Epidemiology and Applied Biometry, University of Tübingen, Tübingen, Germany.
- 15 - Department for Neurodegenerative Diseases, Hertie Institute for Clinical Brain Research, University of Tübingen, Germany.
- 16 - deCODE genetics, Sturlugata 8, IS-101, Reykjavík, Iceland.
- 17 - Department of Pathology and Cell Biology, Columbia University Medical Center, New York, NY 10032.
- 18 - The Taub Institute for Alzheimer's Disease and the Aging Brain, Columbia University Medical Center, New York, NY 10032.
- 19 - A full list of investigators is in the Supplementary Note.
- 20 - Department of Epidemiology, Erasmus MC University Medical Center, Rotterdam, the Netherlands.
- 21 - Department of Radiology, Erasmus MC University Medical Center, Rotterdam, the Netherlands.
- 22 - Department of Neurology, Erasmus MC University Medical Center, Rotterdam, the Netherlands.
- 23 - Stanford Prevention Research Center, Stanford University, Stanford, USA.
- 24 - Neuroscience Unit, Department of Neurology, Faculty of Medicine, University of Thessaly, Greece.
- 25 - Cardiovascular Health Research Unit, Department of Medicine, University of Washington, Seattle, WA.
- 26 - Hope Center for Neurological Disorders, Washington University School of Medicine, St Louis, MO 63110.
- 27 - Department of Radiology, Washington University School of Medicine, St Louis, MO 63110.
- 28 - Department of Neurology, Washington University School of Medicine, St Louis, MO 63110.
- 29 - Department of Psychiatry, Washington University School of Medicine, St Louis, MO 63110.
- 30 - Department of Genetics, Washington University School of Medicine, St Louis, MO 63110.
- 31 - Gertrude H. Sergievsky Center, Columbia University Medical Center, New York, NY 10032.
- 32 - Department of Neurology, Columbia University Medical Center, New York.
- 33 - Department of Psychiatry, Columbia University Medical Center, New York.
- 34 - The Michael J. Fox Foundation for Parkinson's Research, New York, NY.
- 35 - Neuroscience Center, National Institute of Neurological Disorders and Stroke, Bethesda, MD 20892.
- 36 - Department of Neurology, Papageorgiou Hospital, Thessaloniki, Greece.
- 37 - Genome Biology for Neurodegenerative Diseases, German Center for Neurodegenerative Diseases (DZNE), Tübingen, Germany.
- 38 - Epidemiology Branch, National Institute of Environmental Health Sciences, National Institutes of Health, North Carolina.
- 39 - New York State Department of Health Wadsworth Center, Albany, NY, USA.
- 40 - Université Pierre et Marie Curie-Paris, Centre de Recherche de l'Institut du Cerveau et de la Moelle épinière, UMR-S975, Paris, France.

- 41 - Centre National de la Recherche Scientifique, UMR 7225, Paris, France.
- 42 - AP-HP, Pitié-Salpêtrière Hospital, Department of Genetics and Cytogenetics, Paris, France.
- 43 - Center for Human Genetics Research, Vanderbilt University Medical Center, Nashville TN, USA
- 44 - Department of Medical and Molecular Genetics, Indiana University School of Medicine, Indianapolis, IN 46202.
- 45 - UCL Genetics Institute, London, UK
- 46 - INSERM U563, CPTP, Toulouse, France
- 47 - Department of Clinical Genetics, Section of Medical Genomics, VU University Medical Centre, Amsterdam, Netherlands
- 48 - Université Pierre et Marie Curie-Paris, Centre de Recherche de l'Institut du Cerveau et de la Moelle épinière, Paris, France
- 49 - Department of Neurology, Landspítali University Hospital, Reykjavík, Iceland
- 50 - Department of Neurology, MEHT Broomfield Hospital, Chelmsford, Essex, UK
- 51 - Department of Neurology, Addenbrooke's Hospital, University of Cambridge, Cambridge, UK
- 52 - School of Social and Community Medicine, University of Bristol
- 53 - Department of Neurology and Alzheimer Center, VU University Medical Center
- 54 - Department of Motor Neuroscience, UCL Institute of Neurology
- 55 - Department of Neurology, Academic Medical Center, University of Amsterdam, Amsterdam, Netherlands
- 56 - Center for Human Genetic Research and Department of Neurology, Massachusetts General Hospital, Boston, MA, USA
- 57 - Department of Neurology, Radboud University Nijmegen Medical Centre, Nijmegen, Netherlands
- 58 - Department of Medical Genetics, Institute of Human Genetics, University of Tübingen, Tübingen, Germany
- 59 - Newcastle University Clinical Ageing Research Unit, Campus for Ageing and Vitality, Newcastle upon Tyne, UK
- 60 - Neurology M4104, The Medical School, Framlington Place, Newcastle upon Tyne, UK
- 61 - School of Clinical and Experimental Medicine, University of Birmingham, Birmingham, UK
- 62 - Department of Clinical Neurosciences, UCL Institute of Neurology
- 63 - University of Aberdeen, Division of Applied Health Sciences, Population Health Section, Aberdeen, UK
- 64 - CHU Nantes, CIC0004, Service de Neurologie, Nantes, France
- 65 - INSERM U897, Université Victor Segalen, Bordeaux, France
- 66 - Wellcome Trust Sanger Institute, Wellcome Trust Genome Campus, Cambridge, UK
- 67 - Klinik für Neurologie, Universitätsklinikum Schleswig-Holstein, Campus Kiel, Christian-Albrechts-Universität Kiel, Kiel, Germany

- 68 - Parkinson's Disease Research Group, Faculty of Medicine, Imperial College London, London, UK
- 69 - Service de Neurologie, Hôpital Gabriel Montpied, Clermont-Ferrand, France
- 70 - Cambridge Centre for Brain Repair, Cambridge, UK
- 71 - UCL Institute of Neurology
- 72 - University of Aberdeen
- 73 - Department of Neurology, Leiden University Medical Center, Leiden, Netherlands
- 74 - AARP, Washington DC, USA
- 75 - Queen Square Brain Bank for Neurological Disorders, UCL Institute of Neurology
- 76 - Department of Clinical Neurology, John Radcliffe Hospital, Oxford, UK
- 77 - Department of Neurology, Pennsylvania State University, Milton S Hershey Medical Center, Hershey, PA, USA
- 78 - Institute of Epidemiology, Helmholtz Zentrum München, German Research Centre for Environmental Health, Neuherberg, Germany
- 79 - Department of Geriatrics, Landspítali University Hospital, Reykjavík, Iceland
- 80 - INSERM U744, Lille, France
- 81 - Institute of Human Genetics, Helmholtz Zentrum München, German Research Centre for Environmental Health, Neuherberg, Germany
- 82 - Institute of Neurology, Sobell Department, Unit of Functional Neurosurgery, London, UK
- 83 - Section on Molecular Neurogenetics, Medical Genetics Branch, NHGRI, National Institutes of Health
- 84 - MRC Centre for Neuropsychiatric Genetics and Genomics, Cardiff University School of Medicine, Cardiff, UK
- 85 - Neurogenetics Unit, UCL Institute of Neurology and National Hospital for Neurology and Neurosurgery
- 86 - Department of Neurology, Radiology, and Neurobiology at Washington University, St Louis
- 87 - Service de Neurologie, CHU de Grenoble, Grenoble, France
- 88 - Translational Neurology, Biogen Idec, MA, USA
- 89 - Department of Epidemiology, Erasmus University Medical Center
- 90 - Department of Internal Medicine, Erasmus University Medical Center
- 91 - University of Cambridge, Department of Clinical Neurosciences, Addenbrooke's hospital, Cambridge, UK
- 92 - Department of Human Genetics, Radboud University Nijmegen Medical Centre, Nijmegen, Netherlands
- 93 - Department of Neurology, University of Rochester, Rochester, NY, USA
- 94 - Department of Neurology, University of Washington, Seattle, WA, USA.
- 95 - Department of Pathology, University of Edinburgh, Edinburgh, UK
- 96 - Wellcome Trust Centre for Human Genetics, Oxford, UK
- 97 - University of Oxford, Department of Clinical Neurology, John Radcliffe Hospital, Oxford, UK
- 98 - Clinical Research Department, The Parkinson's Institute and Clinical Center, Sunnyvale, CA, USA

- 99 - Service de Neurologie, Hôpital Haut-Lévêque, Pessac, France
- 100 - Department of Psychiatry, University of Cambridge
- 101 - Medical Research Council, University of Cambridge
- 102 - Wellcome Trust Behavioural and Clinical Neurosciences Institute, University of Cambridge
- 103 - INSERM UMR 1043
- 104 - INSERM UMR S975
- 105 - Institut Pasteur de Lille, Université de Lille Nord, Lille, France
- 106 - Department of Neurology, City Hospital, Sandwell and West Birmingham Hospitals NHS Trust, Birmingham, UK
- 107 - Neurosciences Department, Queen Elizabeth Hospital, University Hospitals Birmingham NHS Foundation Trust, Birmingham, UK
- 108 - Program in Medical and Population Genetics, Broad Institute, Cambridge, MA, USA
- 109 - DZNE, German Center for Neurodegenerative Diseases, Tübingen, Germany
- 110 - Albany Medical College
- 111 - Barrow Neurological Institute
- 112 - Baylor College of Medicine
- 113 - Beth Israel Deaconess Medical Center
- 114 - Brigham & Women's Hospital
- 115 - Brown University (Memorial Hospital of RI)
- 116 - Colorado Neurological Institute
- 117 - Columbia University Medical Center
- 118 - Creighton University
- 119 - Evanston Northwestern Healthcare
- 120 - Hotel-Dieu Hospital-Chum
- 121 - Hunter Homes McGuire Veterans Medical Center
- 122 - Indiana University School of Medicine
- 123 - Institute For Neurodegenerative Disorders
- 124 - Johns Hopkins University
- 125 - London Health Sciences Centre
- 126 - Mayo Clinic Jacksonville
- 127 - McFarland Neurosciences
- 128 - Medical College of Georgia
- 129 - Medical College of Wisconsin
- 130 - Medical University of Ohio
- 131 - Mount Sinai School of Medicine
- 132 - North Shore-LIJ Health System
- 133 - Northwestern University
- 134 - Ochsner Clinic Foundation
- 135 - Ohio State University
- 136 - Ottawa Hospital Civic Site
- 137 - Pacific Neuroscience Medical Group
- 138 - Saskatoon Dist Health Board Royal Univ Hosp
- 139 - Scott & White Hospital/Texas A&M University

140 - The Parkinson's & Movement Disorder Institute  
141 - Toronto Western Hospital, University Health  
142 - UMDNJ-School of Osteopathic Medicine  
143 - University of Alabama at Birmingham  
144 - University of Alberta  
145 - University of Calgary  
146 - University of California Irvine  
147 - University of California San Diego  
148 - University of California San Francisco  
149 - University of Chicago  
150 - University of Cincinnati  
151 - University of Colorado Health Sciences Center  
152 - University of Connecticut  
153 - University of Iowa  
154 - University of Kansas Medical Center  
155 - University of Maryland School of Medicine  
156 - University of Miami  
157 - University of Minnesota  
158 - University of New Mexico  
159 - University of Puerto Rico School of Medicine  
160 - University of Rochester  
161 - University of South Florida  
162 - University of Tennessee Health Science Center  
163 - University of Texas Southwestern Medical Center  
164 - Wake Forest University School of Medicine  
165 - Washington University  
166 - University Southern California School of Medicine  
167 - University of Lübeck, Germany  
168 - UMDNJ-Robert Wood Johnson Medical School  
169 - Massachusetts General Hospital, Harvard Medical School  
170 - University of Virginia Health System  
171 - University of Toronto  
172 - Sun Health Research Institute  
173 - Parkinson Institute, Istituti Clinici di Perfezionamento, Milano, Italy  
174 - Cleveland Clinic Foundation  
175 - University of Louisville School of Medicine  
176 - University of Sydney ANZAC Research Institute, Concord Hospital, Sydney, Australia  
177 - Struthers Parkinson's Center, Minneapolis  
178 - Port City Neurology, Scarborough, ME  
179 - Parkinson's Disease and Movement Disorder Center of Boca Raton  
180 - Newcastle University, Newcastle upon Tyne, UK  
181 - General Regional Hospital Bolzano, Bolzano, Italy  
182 - University of Arkansas for Medical Sciences  
183 - Aarhus University Hospital, Aarhus, Denmark  
184 - University of Arizona

185 - Auckland City Hospital, Auckland, New Zealand  
186 - University of Kentucky College of Medicine  
187 - VA Puget Sound Health Care System and University of Washington  
188 - Oregon Health and Sciences University  
189 - Evergreen Hospital Medical Center  
190 - Virginia Mason Medical Center  
191 - Samuel Stratton VA Medical Center and Albany Medical Center  
192 - Emory University  
193 - Department of Neurology, Gertrude H Sergievsky Center and Taub Institute for Alzheimer's Disease and the Aging Brain, Columbia University Medical Center  
194 - Department of Neurology, Columbia University Medical Center  
195 - Miami Udall PD Research Center of Excellence  
196 - Institute for Human Genomics, University of Miami, Miller School of Medicine, Miami FL, USA  
197 - Center for Human Genetics Research, Vanderbilt University Medical Center, Nashville TN, USA  
198 - Department of Epidemiology, University of Washington, Seattle, WA.  
199 - Department of Health Services, University of Washington, Seattle, WA.  
200 - Group Health Research Institute, Group Health Cooperative, Seattle, WA.  
201 - Cardiovascular Health Study, Department of Neurology, University of Pittsburgh, Pittsburgh, PA, USA.  
202 - Department of Internal Medicine, Erasmus MC University Medical Center, Rotterdam, the Netherlands  
203 - Department of Neurology, Cardiff University, Cardiff, UK  
204 - INSERM CIC-9503, Hôpital Pitié-Salpêtrière, Paris, France  
205 - Department of Pathology and Cell Biology, Columbia University Medical Center  
206 - Department of Neurology, Gertrude H Sergievsky Center  
207 - Department of Epidemiology & Biostatistics and Institute for Computational Biology, Case Western Reserve University, Cleveland OH, USA  
208 - Research Resources Branch, National Institute on Aging, National Institutes of Health, Bethesda, MD, USA  
209 - Clinical Research Branch, National Institute on Aging, Baltimore, MD, USA  
210 - NICHD Brain and Tissue Bank for Developmental Disorders, University of Maryland Medical School, Baltimore, Maryland 21201, USA  
211 - Lymphocyte Cell Biology Unit, Laboratory of Immunology, National Institute on Aging, National Institutes of Health, Baltimore, MD, USA  
212 - Brain Resource Center, Johns Hopkins University, Baltimore, MD, USA  
213 - Department of Neuroscience, Karolinska Institutet, 171 77 Stockholm, Sweden  
214 - Department of Neuropathology, MRC Sudden Death Brain Bank Project, University of Edinburgh, Wilkie Building, Teviot Place, Edinburgh EH8 9AG)  
215 - Department of Genetics, King Faisal Specialist Hospital and Research Centre, PO Box 3354, Riyadh 11211, Saudi Arabia



216 - Department of Neurology, Medical School, University of Crete, Heraklion, Crete, Greece  
217 - 'Hygeia' Hospital, Clinic of Neurodegenerative Disorders, Athens, Greece.  
218 - Second Department of Neurology, National and Kapodistrian University of Athens Medical School, Athens, Greece.  
219 - Division of Cell Biology, Biomedical Research Foundation of the Academy of Athens, Athens, Greece.  
220 - Neurogenetics Unit, 1st Department of Neurology, University of Athens Medical School, Eginition Hospital, Athens, Greece  
221 - General Hospital of Syros, Syros, Greece.  
222 - Division of Basic Neurosciences, Biomedical Research Foundation of the Academy of Athens, Athens, Greece.  
223 - Department of Neuroscience, King's College London Institute of Psychiatry, London, UK  
224 - Oxford Parkinson's Disease Centre, Nuffield Department of Clinical Neurosciences, University of Oxford, UK  
225 - Department of Neuropathology, Nuffield Department of Clinical Neurosciences, University of Oxford, John Radcliffe Hospital, OX3 9DU.  
226 - Department of Medical and Molecular Genetics, King's College London, 8th Floor, Tower Wing, Guy's Hospital, London SE1 9RT, UK)  
227 - CNRS, Paris, France  
228 - Pitié-Salpêtrière Hospital  
229 - Clinical neuroscience Center, 26400 West Twelve Mile Road, Suite 110, Southfield, MI 48034  
230 - Department of Neurology, University Hospital of Larissa, Greece  
231 - Queen Mary College, University of London, London, UK  
232 - Neurology M4104, The Medical School, Newcastle upon Tyne, UK  
233 - Boston University School of Medicine, Boston, MA, USA  
234 - Washington University School of Medicine



Supplementary Table 2 (page 19): Additional details related to Table 1. C - Chromosome; OR - odds ratio; I2 – index of heterogeneity. \*replication genotyping for these SNPs failed assay design or quality control and a suitable proxy variant was selected (rs35749011, proxy rs71628662; rs1474055, proxy rs1955337; rs115185635, proxy rs62267708; rs117896735, proxy rs118117788; rs3793947, proxy rs12283611; rs1555399, proxy rs1077989; rs62120679, proxy rs10402629; rs8118008, proxy rs55785911). Note, only replication phase p-values are one-sided. Nearest gene or previously published proximal gene names included in table.

| SNP          | C  | Position (bp) | SNP Information  |               |                  | Discovery phase (13,728 cases and 95,282 controls) |      |        |            |                |            | Replication phase (5,353 cases and 5,551 controls) |        |            |                |            |       | Joint phase (19,081 cases and 100,833 controls) |            |                |          |  |  |
|--------------|----|---------------|------------------|---------------|------------------|----------------------------------------------------|------|--------|------------|----------------|------------|----------------------------------------------------|--------|------------|----------------|------------|-------|-------------------------------------------------|------------|----------------|----------|--|--|
|              |    |               | Nearest gene(s)  | Effect allele | Alternate allele | Effect allele frequency                            | I2   | Beta   | Odds ratio | Standard error | P          | I2                                                 | Beta   | Odds ratio | Standard error | P          | I2    | Beta                                            | Odds ratio | Standard error | P        |  |  |
| rs35749011*  | 1  | 155,135,036   | GBASVT11         | a             | g                | 0.017                                              | 0    | 0.566  | 1.762      | 0.057          | 6.09x10-23 | 0                                                  | 0.836  | 2.307      | 0.148          | 7.48x10-09 | 65.5  | 0.601                                           | 1.824      | 0.053          | 1.37x-29 |  |  |
| rs823118     | 1  | 205,723,572   | RAB7L1/NUCKS1    | t             | c                | 0.559                                              | 55.7 | 0.119  | 1.126      | 0.016          | 1.36x10-13 | 0                                                  | 0.104  | 1.109      | 0.029          | 1.43x10-04 | 0     | 0.116                                           | 1.122      | 0.014          | 1.66x-16 |  |  |
| rs10797576   | 1  | 232,664,611   | SIPAL12          | t             | c                | 0.14                                               | 0    | 0.13   | 1.139      | 0.023          | 1.19x10-08 | 26                                                 | 0.104  | 1.11       | 0.039          | 3.38x10-03 | 0     | 0.123                                           | 1.131      | 0.020          | 4.87x-10 |  |  |
| rs6430538    | 2  | 135,539,967   | ACMSD/TMEM163    | t             | c                | 0.43                                               | 0    | -0.136 | 0.873      | 0.017          | 5.66x10-15 | 47.9                                               | -0.126 | 0.882      | 0.029          | 9.42x10-06 | 0     | -0.133                                          | 0.875      | 0.015          | 9.13x-20 |  |  |
| rs1474055*   | 2  | 169,110,394   | STK39            | t             | c                | 0.128                                              | 9.3  | 0.193  | 1.213      | 0.024          | 7.12x10-16 | 54.4                                               | 0.198  | 1.218      | 0.042          | 1.07x10-06 | 0     | 0.194                                           | 1.214      | 0.021          | 1.15x-20 |  |  |
| rs115185635* | 3  | 87,520,857    | KRT8P25/POOP2    | c             | g                | 0.035                                              | 91   | 0.582  | 1.789      | 0.104          | 2.18x10-08 | 30.4                                               | -0.071 | 0.931      | 0.07           | 0.846      | 96.3  | 0.133                                           | 1.142      | 0.058          | 0.022    |  |  |
| rs12837471   | 3  | 182,762,437   | MCCC1            | a             | g                | 0.193                                              | 26.6 | -0.17  | 0.844      | 0.021          | 3.32x10-16 | 59                                                 | -0.179 | 0.836      | 0.036          | 3.72x10-07 | 0     | -0.172                                          | 0.842      | 0.018          | 2.14x-21 |  |  |
| rs34311866   | 4  | 951,947       | TMEM175/GAK/DGKQ | t             | g                | 0.809                                              | 52.4 | -0.243 | 0.784      | 0.02           | 3.58x10-33 | 55.4                                               | -0.234 | 0.791      | 0.035          | 6.29x10-12 | 0     | -0.241                                          | 0.786      | 0.017          | 1.02x-43 |  |  |
| rs11724635   | 4  | 15,737,101    | BST1             | a             | t                | 0.553                                              | 14.8 | 0.116  | 1.122      | 0.016          | 8.07x10-13 | 20.6                                               | 0.129  | 1.138      | 0.028          | 2.73x10-06 | 0     | 0.119                                           | 1.126      | 0.014          | 9.44x-18 |  |  |
| rs6812193    | 4  | 77,198,986    | FAM47E/SCARB2    | t             | c                | 0.364                                              | 29.5 | -0.108 | 0.897      | 0.017          | 7.17x10-11 | 10.7                                               | -0.067 | 0.935      | 0.029          | 0.011      | 32.8  | -0.098                                          | 0.907      | 0.015          | 2.95x-11 |  |  |
| rs366182     | 4  | 90,626,111    | SNCA             | a             | g                | 0.633                                              | 48.5 | -0.306 | 0.737      | 0.018          | 3.23x10-67 | 34.4                                               | -0.196 | 0.822      | 0.028          | 1.75x10-12 | 90.8  | -0.274                                          | 0.760      | 0.015          | 4.16x-73 |  |  |
| rs9275326*   | 6  | 32,666,660    | HLA-DQB1         | t             | c                | 0.094                                              | 2.1  | -0.227 | 0.797      | 0.032          | 5.82x10-13 | 0                                                  | -0.105 | 0.9        | 0.05           | 0.018      | 76.3  | -0.192                                          | 0.826      | 0.027          | 1.19x-12 |  |  |
| rs199347     | 7  | 23,299,746    | GNMNB            | a             | g                | 0.59                                               | 10   | 0.116  | 1.123      | 0.017          | 2.37x10-12 | 26.6                                               | 0.07   | 1.072      | 0.029          | 7.66x10-03 | 46.6  | 0.104                                           | 1.110      | 0.015          | 1.18x-12 |  |  |
| rs117896735* | 10 | 121,536,327   | INPP5F           | a             | g                | 0.014                                              | 15.2 | 0.569  | 1.767      | 0.084          | 1.21x10-11 | 0                                                  | 0.339  | 1.404      | 0.111          | 1.10x10-03 | 63.4  | 0.485                                           | 1.624      | 0.067          | 4.34x-13 |  |  |
| rs3793947*   | 11 | 83,544,472    | DLG2             | a             | g                | 0.443                                              | 0    | -0.092 | 0.912      | 0.017          | 2.59x10-08 | 0                                                  | -0.024 | 0.976      | 0.028          | 0.201      | 76.8  | -0.074                                          | 0.929      | 0.015          | 3.96x-07 |  |  |
| rs329648     | 11 | 133,765,367   | MIR4697          | t             | c                | 0.354                                              | 0    | 0.095  | 1.1        | 0.017          | 1.65x10-08 | 48.5                                               | 0.114  | 1.121      | 0.029          | 4.38x10-05 | 0     | 0.100                                           | 1.105      | 0.015          | 9.83x-12 |  |  |
| rs76904798   | 12 | 40,614,434    | LRRK2            | t             | c                | 0.143                                              | 0    | 0.157  | 1.17       | 0.022          | 1.33x10-12 | 26.4                                               | 0.104  | 1.11       | 0.039          | 3.69x10-03 | 28.6  | 0.144                                           | 1.155      | 0.019          | 5.24x-14 |  |  |
| rs11060180   | 12 | 123,303,586   | CCDC62           | a             | g                | 0.558                                              | 42.8 | 0.097  | 1.101      | 0.017          | 2.14x10-08 | 0                                                  | 0.108  | 1.114      | 0.028          | 7.26x10-05 | 0     | 0.100                                           | 1.105      | 0.015          | 6.02x-12 |  |  |
| rs11158026   | 14 | 55,348,869    | GCH1             | a             | g                | 0.335                                              | 32.1 | -0.118 | 0.889      | 0.018          | 7.13x10-11 | 0                                                  | -0.054 | 0.948      | 0.03           | 0.039      | 70.1  | -0.101                                          | 0.904      | 0.015          | 5.85x-11 |  |  |
| rs1555399*   | 14 | 67,984,370    | TMEM229B         | t             | c                | 0.468                                              | 97.2 | -0.138 | 0.872      | 0.017          | 5.53x10-16 | 0                                                  | -0.03  | 0.971      | 0.028          | 0.144      | 90.8  | -0.109                                          | 0.897      | 0.015          | 6.53x-14 |  |  |
| rs2414739    | 15 | 61,994,134    | VPS13C           | a             | g                | 0.734                                              | 29   | 0.108  | 1.114      | 0.018          | 4.13x10-09 | 1.1                                                | 0.104  | 1.109      | 0.033          | 7.96x10-04 | 0     | 0.107                                           | 1.113      | 0.016          | 1.23x-11 |  |  |
| rs142435     | 16 | 31,121,793    | BCKDK/STX1B      | a             | g                | 0.381                                              | 25.5 | 0.09   | 1.094      | 0.016          | 3.89x10-08 | 27.5                                               | 0.125  | 1.133      | 0.029          | 7.72x10-06 | 10.4  | 0.098                                           | 1.103      | 0.014          | 2.43x-12 |  |  |
| rs17649553   | 17 | 43,994,648    | MAPT             | a             | g                | 0.226                                              | 0    | -0.261 | 0.771      | 0.021          | 4.86x10-37 | 0                                                  | -0.269 | 0.764      | 0.035          | 7.03x10-15 | 0     | -0.263                                          | 0.769      | 0.018          | 2.37x-48 |  |  |
| rs12456492   | 18 | 40,673,380    | RIT2             | t             | c                | 0.693                                              | 11.2 | -0.1   | 0.905      | 0.017          | 5.12x10-09 | 49.1                                               | -0.105 | 0.9        | 0.03           | 2.16x10-04 | 0     | -0.101                                          | 0.904      | 0.015          | 7.74x-12 |  |  |
| rs62120679*  | 19 | 2,363,319     | SPP12B           | t             | c                | 0.314                                              | 47.1 | 0.132  | 1.141      | 0.022          | 2.53x10-09 | 40.3                                               | -0.002 | 0.999      | 0.034          | 0.518      | 90.9  | 0.093                                           | 1.097      | 0.019          | 5.57x-07 |  |  |
| rs8118008*   | 20 | 3,168,166     | DDRK1            | a             | g                | 0.657                                              | 32.8 | 0.105  | 1.111      | 0.019          | 2.32x10-08 | 0                                                  | 0.107  | 1.113      | 0.029          | 1.18x10-04 | 0     | 0.106                                           | 1.111      | 0.016          | 3.04x-11 |  |  |
| rs34016896   | 3  | 160,992,864   | NMD3             | t             | c                | 0.319                                              | 37.8 | 0.077  | 1.08       | 0.017          | 7.68x10-06 | 0                                                  | 0.028  | 1.028      | 0.03           | 0.174      | 50.5  | 0.065                                           | 1.067      | 0.015          | 1.08x-05 |  |  |
| rs691323     | 8  | 16,697,091    | FGF20            | a             | g                | 0.275                                              | 0    | -0.083 | 0.921      | 0.019          | 1.30x10-05 | 1.7                                                | -0.103 | 0.902      | 0.032          | 6.16x10-04 | 0     | -0.088                                          | 0.916      | 0.016          | 6.68x-08 |  |  |
| rs60298754   | 8  | 89,373,041    | MMP16            | t             | c                | 0.024                                              | 53.6 | 0.075  | 1.078      | 0.056          | 0.181      | -                                                  | -      | -          | -              | -          | 0.075 | 1.078                                           | 0.056      | 0.181          |          |  |  |
| rs7077361    | 10 | 15,561,543    | ITGA8            | t             | c                | 0.874                                              | 0    | 0.104  | 1.11       | 0.025          | 3.24x10-05 | 34.4                                               | 0.043  | 1.044      | 0.042          | 0.154      | 35.8  | 0.088                                           | 1.092      | 0.022          | 4.16x-05 |  |  |
| rs11866035   | 17 | 17,715,101    | SREBF1/RA11      | a             | g                | 0.298                                              | 56.2 | -0.065 | 0.937      | 0.018          | 2.17x10-04 | 0                                                  | -0.055 | 0.947      | 0.031          | 0.036      | 0     | -0.063                                          | 0.939      | 0.016          | 5.99x-05 |  |  |
| rs2823357    | 21 | 16,914,905    | USP25            | a             | g                | 0.37                                               | 57   | 0.035  | 1.036      | 0.016          | 0.032      | 55.9                                               | 0.018  | 1.018      | 0.029          | 0.267      | 0     | 0.031                                           | 1.031      | 0.014          | 0.027    |  |  |

Previously Reported as Significant in Genome Wide Studies

Supplementary Table 3 (page 20):  
 Additional details related to Table 2.  
 Replication genotyping for these SNPs failed assay design or quality control and a suitable proxy variant was selected (rs1596117, proxy rs4859430; rs7681154, proxy rs3910105; rs13201101, proxy rs8192591; based on discovery series comparison, the minor allele for rs3910105 tags the major allele of rs7681154 therefore risk is consistent across proxy and discovery SNP). Note, only replication phase p-values are one-sided. Nearest gene or previously published proximal gene names included in table.

| SNP        | Discovery series | Replication series | Nearest gene | Discovery series p-value | Replication series p-value | LD (r) | Discovery series OR | Replication series OR | Discovery series 95% CI | Replication series 95% CI |
|------------|------------------|--------------------|--------------|--------------------------|----------------------------|--------|---------------------|-----------------------|-------------------------|---------------------------|
| rs1596117  | rs4859430        | rs4859430          | MAP3K4       | 0.002                    | 0.002                      | 0.99   | 1.02                | 1.02                  | 0.99-1.05               | 0.99-1.05                 |
| rs7681154  | rs3910105        | rs3910105          | MAP3K4       | 0.002                    | 0.002                      | 0.99   | 1.02                | 1.02                  | 0.99-1.05               | 0.99-1.05                 |
| rs13201101 | rs8192591        | rs8192591          | MAP3K4       | 0.002                    | 0.002                      | 0.99   | 1.02                | 1.02                  | 0.99-1.05               | 0.99-1.05                 |
| rs13201101 | rs3910105        | rs3910105          | MAP3K4       | 0.002                    | 0.002                      | 0.99   | 1.02                | 1.02                  | 0.99-1.05               | 0.99-1.05                 |
| rs13201101 | rs7681154        | rs7681154          | MAP3K4       | 0.002                    | 0.002                      | 0.99   | 1.02                | 1.02                  | 0.99-1.05               | 0.99-1.05                 |
| rs13201101 | rs1596117        | rs1596117          | MAP3K4       | 0.002                    | 0.002                      | 0.99   | 1.02                | 1.02                  | 0.99-1.05               | 0.99-1.05                 |
| rs13201101 | rs13201101       | rs13201101         | MAP3K4       | 0.002                    | 0.002                      | 1.00   | 1.02                | 1.02                  | 0.99-1.05               | 0.99-1.05                 |

Supplementary Table 4 (page 21): Summary statistics for risk profile scoring analyses.

| Study    | Trend p-value | AUC  | Trend (1 SD of change from mean) |           | 1st quintile |        | 2nd quintile |           | 3rd quintile |           | 4th quintile |           | 5th quintile |           |
|----------|---------------|------|----------------------------------|-----------|--------------|--------|--------------|-----------|--------------|-----------|--------------|-----------|--------------|-----------|
|          |               |      | OR                               | 95% CI    | OR           | 95% CI | OR           | 95% CI    | OR           | 95% CI    | OR           | 95% CI    | OR           | 95% CI    |
| USA      | <2x10-16      | 0.61 | 1.5                              | 1.41-1.59 | 1            | -      | 1.47         | 1.23-1.76 | 1.66         | 1.39-1.99 | 2.14         | 1.79-2.56 | 3.16         | 2.64-3.79 |
| Germany  | 6.35x10-12    | 0.59 | 1.4                              | 1.27-1.54 | 1            | -      | 1.34         | 1-1.78    | 1.7          | 1.27-2.27 | 1.86         | 1.38-2.49 | 2.66         | 1.97-3.59 |
| Greece   | 5.12x10-11    | 0.58 | 1.38                             | 1.25-1.52 | 1            | -      | 1.38         | 1.03-1.85 | 1.47         | 1.09-1.97 | 1.61         | 1.2-2.17  | 2.48         | 1.83-3.36 |
| UK       | 6.36x10-05    | 0.61 | 1.51                             | 1.23-1.85 | 1            | -      | 1.48         | 0.78-2.83 | 2.38         | 1.15-4.93 | 2.52         | 1.28-4.95 | 4.13         | 2.03-8.39 |
| France   | <2x10-16      | 0.67 | 1.92                             | 1.65-2.22 | 1            | -      | 1.43         | 0.93-2.18 | 2.24         | 1.48-3.39 | 3.01         | 1.96-4.62 | 5.97         | 3.79-9.38 |
| Combined | <2x10-16      | 0.63 | 1.51                             | 1.38-1.66 | 1            | -      | 1.42         | 1.25-1.61 | 1.7          | 1.5-1.93  | 2.07         | 1.72-2.48 | 3.31         | 2.55-4.3  |
| % Cases  |               |      |                                  |           |              | 36.14  |              | 43.92     |              | 48.44     |              | 53.62     |              | 63.34     |

Supplementary Table 5 (page 22):  
 Genome-wide significant SNPs are associated with distinct changes in methylation and expression levels in proximal genomic regions across multiple brain regions.

| Methylation or expression | Brain region | SNP       | Probe        | Chromosome | SNP position (BP) | Reference allele | Alternate allele | Reference allele frequency | Imputation quality for SNP (R <sup>2</sup> CSQ from minimum) | Effect of alternate allele dosage (in Z units) | Standard error         | P-value                | FDR adjusted P-value   | Probe start (BP) | Probe end (BP) | Gene or miRNA symbol |
|---------------------------|--------------|-----------|--------------|------------|-------------------|------------------|------------------|----------------------------|--------------------------------------------------------------|------------------------------------------------|------------------------|------------------------|------------------------|------------------|----------------|----------------------|
| Expression                | Cerebellum   | rs823118  | ILMN_1698082 | 1          | 205723572         | T                | C                | 0.545                      | 0.984                                                        | 0.317                                          | 0.089                  | 7.72x10 <sup>-06</sup> | 4.23x10 <sup>-04</sup> | 205897394        | 205897443      | NUCKS1               |
|                           |              | rs1823116 | ILMN_163085  | 1          | 205723572         | T                | C                | 0.545                      | 0.984                                                        | -0.347                                         | 0.078                  | 4.37x10 <sup>-07</sup> | 4.27x10 <sup>-05</sup> | 205739374        | 205739423      | NUCKS1               |
|                           |              | rs193947  | ILMN_179816  | 6          | 23283746          | A                | G                | 0.591                      | 0.87                                                         | -0.414                                         | 0.079                  | 1.66x10 <sup>-07</sup> | 1.37x10 <sup>-05</sup> | 23240107         | 23240156       | NUPL2                |
|                           |              | rs193947  | ILMN_2115154 | 7          | 23283746          | A                | G                | 0.591                      | 0.87                                                         | -0.44                                          | 0.082                  | 2.66x10 <sup>-08</sup> | 2.86x10 <sup>-06</sup> | 23240192         | 23240241       | NUPL2                |
|                           |              | rs1764953 | ILMN_179549  | 17         | 43984648          | C                | C                | 0.738                      | 0.965                                                        | -0.471                                         | 0.082                  | 7.90x10 <sup>-09</sup> | 1.32x10 <sup>-06</sup> | 43513445         | 43513494       | PLEKHM1              |
|                           |              | rs1764953 | ILMN_2393693 | 17         | 43984648          | C                | C                | 0.738                      | 0.965                                                        | -1.241                                         | 0.09                   | 1.41x10 <sup>-03</sup> | 4.69x10 <sup>-04</sup> | 43594483         | 43594532       | MCG5746              |
|                           |              | rs1818008 | ILMN_1797928 | 20         | 3189166           | A                | T                | 0.602                      | 0.965                                                        | -0.235                                         | 0.072                  | 1.00x10 <sup>-03</sup> | 4.80x10 <sup>-02</sup> | 3171277          | 3171277        | DDRGK1               |
|                           |              | rs823118  | ILMN_1698082 | 1          | 205723572         | T                | C                | 0.545                      | 0.984                                                        | -0.273                                         | 0.089                  | 6.88x10 <sup>-08</sup> | 1.19x10 <sup>-05</sup> | 205897394        | 205897443      | NUCKS1               |
|                           |              | rs823118  | ILMN_193085  | 1          | 205723572         | T                | C                | 0.545                      | 0.984                                                        | -0.237                                         | 0.086                  | 6.88x10 <sup>-08</sup> | 1.19x10 <sup>-05</sup> | 205739374        | 205739423      | NUCKS1               |
|                           |              | rs193947  | ILMN_179816  | 6          | 23283746          | A                | G                | 0.591                      | 0.87                                                         | -0.404                                         | 0.079                  | 3.20x10 <sup>-04</sup> | 3.59x10 <sup>-05</sup> | 23240192         | 23240241       | NUPL2                |
|                           |              | rs193947  | ILMN_2115154 | 7          | 23283746          | A                | G                | 0.591                      | 0.87                                                         | -0.404                                         | 0.079                  | 3.91x10 <sup>-04</sup> | 2.80x10 <sup>-05</sup> | 3107258          | 3107258        | NUPL2                |
|                           |              | rs14235   | ILMN_1792926 | 16         | 31121793          | G                | G                | 0.82                       | 0.942                                                        | 0.325                                          | 0.092                  | 7.93x10 <sup>-04</sup> | 3.30x10 <sup>-02</sup> | 31142528         | 31142528       | NUPL2                |
|                           |              | rs14235   | ILMN_1804679 | 16         | 31121793          | G                | A                | 0.82                       | 0.942                                                        | -0.308                                         | 0.092                  | 7.93x10 <sup>-04</sup> | 3.30x10 <sup>-02</sup> | 31142528         | 31142528       | NUPL2                |
|                           |              | rs1764953 | ILMN_1698080 | 17         | 43984648          | G                | T                | 0.738                      | 0.965                                                        | -0.278                                         | 0.082                  | 6.99x10 <sup>-04</sup> | 4.46x10 <sup>-06</sup> | 44594196         | 44594245       | KAT8                 |
|                           |              | rs818008  | ILMN_1797928 | 20         | 3189166           | A                | T                | 0.602                      | 0.965                                                        | -0.25                                          | 0.072                  | 5.16x10 <sup>-04</sup> | 2.90x10 <sup>-02</sup> | 3171278          | 3171278        | ARRL1A               |
| rs823118                  | CG14159172   | 1         | 205723572    | T          | C                 | 0.545            | 0.986            | -0.844                     | 0.079                                                        | 1.03x10 <sup>-26</sup>                         | 4.46x10 <sup>-24</sup> | 205819179              | 205819228              | DDRGK1           |                |                      |
| rs823118                  | CG14159172   | 1         | 205723572    | T          | C                 | 0.545            | 0.986            | -0.844                     | 0.079                                                        | 1.03x10 <sup>-26</sup>                         | 4.46x10 <sup>-24</sup> | 205819179              | 205819228              | DDRGK1           |                |                      |
| rs13201101                | CG07636337   | 6         | 32343504     | C          | T                 | 0.949            | 0.997            | -0.863                     | 0.188                                                        | 4.46x10 <sup>-02</sup>                         | 4.46x10 <sup>-02</sup> | 32191855               | 32191855               | NOTCH4           |                |                      |
| rs13201101                | CG14700707   | 6         | 32343504     | C          | T                 | 0.949            | 0.997            | -0.864                     | 0.186                                                        | 3.73x10 <sup>-04</sup>                         | 4.60x10 <sup>-02</sup> | 31849846               | 31849896               | SLC44A4          |                |                      |
| rs193947                  | CG17274742   | 7         | 23283746     | A          | T                 | 0.745            | 0.903            | -0.765                     | 0.092                                                        | 3.97x10 <sup>-05</sup>                         | 6.88x10 <sup>-03</sup> | 32191840               | 32191890               | NOTCH4           |                |                      |
| rs1764953                 | CG19832721   | 17        | 43984648     | G          | T                 | 0.745            | 0.903            | -0.404                     | 0.092                                                        | 1.17x10 <sup>-05</sup>                         | 2.53x10 <sup>-03</sup> | 23284849               | 23284899               | GPINMB           |                |                      |
| rs818008                  | CG11004910   | 20        | 3189166      | A          | G                 | 0.545            | 0.998            | -0.283                     | 0.083                                                        | 4.43x10 <sup>-07</sup>                         | 1.70x10 <sup>-04</sup> | 44249816               | 44249866               | KILM1267         |                |                      |
| rs823118                  | CG14159172   | 1         | 205723572    | T          | C                 | 0.545            | 0.986            | -0.793                     | 0.079                                                        | 3.62x10 <sup>-24</sup>                         | 4.89x10 <sup>-21</sup> | 205819179              | 205819228              | SLC44A1          |                |                      |
| rs823118                  | CG14159172   | 1         | 205723572    | T          | C                 | 0.545            | 0.986            | -0.793                     | 0.079                                                        | 3.62x10 <sup>-24</sup>                         | 4.89x10 <sup>-21</sup> | 205819179              | 205819228              | SLC44A1          |                |                      |
| rs13201101                | CG07636337   | 6         | 32343504     | C          | T                 | 0.949            | 0.997            | -0.798                     | 0.188                                                        | 1.82x10 <sup>-05</sup>                         | 2.82x10 <sup>-02</sup> | 31849846               | 31849896               | SLC44A4          |                |                      |
| rs193947                  | CG17274742   | 7         | 23283746     | A          | T                 | 0.578            | 0.903            | -0.444                     | 0.092                                                        | 8.46x10 <sup>-08</sup>                         | 1.83x10 <sup>-05</sup> | 23284849               | 23284899               | GPINMB           |                |                      |
| rs193947                  | CG22632319   | 7         | 23283746     | A          | A                 | 0.578            | 0.903            | -0.444                     | 0.092                                                        | 7.55x10 <sup>-08</sup>                         | 1.83x10 <sup>-05</sup> | 23284849               | 23284899               | GPINMB           |                |                      |
| rs14235                   | CG25033993   | 16        | 31121793     | G          | A                 | 0.811            | 0.743            | 0.441                      | 0.1                                                          | 1.12x10 <sup>-05</sup>                         | 1.93x10 <sup>-03</sup> | 31022372               | 31022422               | STXB2            |                |                      |

Supplementary Table 6 (page 23): Minor allele frequencies for all SNPs in meta-analysis stratified by case-control status for discovery and replication phases. All replication samples were included in these estimates. Discovery phase estimates include all 23andMe samples, PGPD, HIHG, NGRC and all IPDGC samples except those from the UK and Iceland.

| SNP         | C  | Position (bp) | Minor allele | Discovery and conditional phases,<br>minor allele frequency (cases) | Discovery and conditional phases,<br>minor allele frequency (controls) | Replication phase,<br>minor allele frequency<br>(cases) | Replication phase,<br>minor allele<br>frequency<br>(controls) |
|-------------|----|---------------|--------------|---------------------------------------------------------------------|------------------------------------------------------------------------|---------------------------------------------------------|---------------------------------------------------------------|
| rs114138760 | 1  | 154898185     | C            | 0.015                                                               | 0.011                                                                  | 0.013                                                   | 0.009                                                         |
| rs35749011  | 1  | 155135036     | A            | 0.026                                                               | 0.014                                                                  | NA                                                      | NA                                                            |
| rs71628662  | 1  | 155359992     | C            | 0.028                                                               | 0.018                                                                  | 0.015                                                   | 0.007                                                         |
| rs8231118   | 1  | 205723572     | C            | 0.416                                                               | 0.444                                                                  | 0.405                                                   | 0.435                                                         |
| rs10797576  | 1  | 232664611     | T            | 0.152                                                               | 0.134                                                                  | 0.163                                                   | 0.146                                                         |
| rs6430538   | 2  | 135539967     | T            | 0.408                                                               | 0.436                                                                  | 0.480                                                   | 0.497                                                         |
| rs1474055   | 2  | 169110394     | T            | 0.145                                                               | 0.123                                                                  | NA                                                      | NA                                                            |
| rs1955337   | 2  | 169129145     | T            | 0.147                                                               | 0.125                                                                  | 0.142                                                   | 0.121                                                         |
| rs62267708  | 3  | 87489314      | T            | 0.021                                                               | 0.021                                                                  | 0.042                                                   | 0.043                                                         |
| rs115185635 | 3  | 87520857      | C            | 0.022                                                               | 0.022                                                                  | NA                                                      | NA                                                            |
| rs34016896  | 3  | 160992864     | T            | 0.331                                                               | 0.312                                                                  | 0.335                                                   | 0.326                                                         |
| rs12637471  | 3  | 182762437     | A            | 0.177                                                               | 0.200                                                                  | 0.174                                                   | 0.199                                                         |
| rs79217002  | 3  | 183011072     | G            | 0.011                                                               | 0.008                                                                  | 0.011                                                   | 0.012                                                         |
| rs34884217  | 4  | 944210        | C            | 0.062                                                               | 0.073                                                                  | 0.096                                                   | 0.105                                                         |
| rs34311866  | 4  | 951947        | C            | 0.226                                                               | 0.183                                                                  | 0.236                                                   | 0.195                                                         |
| rs11724635  | 4  | 15737101      | C            | 0.422                                                               | 0.455                                                                  | 0.421                                                   | 0.456                                                         |
| rs4859430   | 4  | 77149099      | A            | 0.150                                                               | 0.132                                                                  | 0.142                                                   | 0.133                                                         |
| rs1596117   | 4  | 77151490      | T            | 0.218                                                               | 0.198                                                                  | NA                                                      | NA                                                            |
| rs6812193   | 4  | 77198986      | T            | 0.342                                                               | 0.370                                                                  | 0.348                                                   | 0.363                                                         |
| rs356182    | 4  | 90626111      | G            | 0.421                                                               | 0.355                                                                  | 0.397                                                   | 0.337                                                         |
| rs3910105   | 4  | 90682571      | G            | 0.427                                                               | 0.457                                                                  | 0.444                                                   | 0.459                                                         |
| rs7681154   | 4  | 90763703      | C            | 0.502                                                               | 0.500                                                                  | NA                                                      | NA                                                            |
| rs8192591   | 6  | 32185796      | T            | 0.039                                                               | 0.036                                                                  | 0.033                                                   | 0.028                                                         |
| rs13201101  | 6  | 32343604      | T            | 0.057                                                               | 0.050                                                                  | NA                                                      | NA                                                            |
| rs9275326   | 6  | 32666660      | T            | 0.083                                                               | 0.097                                                                  | 0.083                                                   | 0.093                                                         |
| rs199347    | 7  | 23293746      | G            | 0.385                                                               | 0.413                                                                  | 0.396                                                   | 0.416                                                         |
| rs591323    | 8  | 16697091      | A            | 0.261                                                               | 0.279                                                                  | 0.252                                                   | 0.272                                                         |
| rs60298754  | 8  | 89373041      | T            | 0.025                                                               | 0.023                                                                  | NA                                                      | NA                                                            |
| rs7077361   | 10 | 15561543      | C            | 0.116                                                               | 0.130                                                                  | 0.124                                                   | 0.131                                                         |
| rs10886515  | 10 | 121343589     | C            | 0.270                                                               | 0.291                                                                  | 0.281                                                   | 0.284                                                         |
| rs117896735 | 10 | 121536327     | A            | 0.017                                                               | 0.012                                                                  | NA                                                      | NA                                                            |
| rs118117788 | 10 | 121710488     | T            | 0.013                                                               | 0.008                                                                  | 0.021                                                   | 0.015                                                         |
| rs12283611  | 11 | 83487277      | A            | 0.398                                                               | 0.415                                                                  | 0.418                                                   | 0.426                                                         |
| rs3793947   | 11 | 83544472      | A            | 0.428                                                               | 0.446                                                                  | NA                                                      | NA                                                            |
| rs329648    | 11 | 133765367     | T            | 0.372                                                               | 0.346                                                                  | 0.388                                                   | 0.359                                                         |
| rs76904798  | 12 | 40614434      | T            | 0.162                                                               | 0.141                                                                  | 0.159                                                   | 0.144                                                         |
| rs11060180  | 12 | 123303586     | G            | 0.426                                                               | 0.444                                                                  | 0.420                                                   | 0.446                                                         |
| rs11158026  | 14 | 55348869      | T            | 0.309                                                               | 0.334                                                                  | 0.307                                                   | 0.318                                                         |
| rs1077989   | 14 | 67975822      | C            | 0.484                                                               | 0.486                                                                  | 0.480                                                   | 0.487                                                         |
| rs1555399   | 14 | 67984370      | A            | 0.478                                                               | 0.481                                                                  | NA                                                      | NA                                                            |
| rs2414739   | 15 | 61994134      | G            | 0.244                                                               | 0.269                                                                  | 0.240                                                   | 0.264                                                         |
| rs14235     | 16 | 31121793      | A            | 0.400                                                               | 0.374                                                                  | 0.427                                                   | 0.395                                                         |
| rs11868035  | 17 | 17715101      | A            | 0.287                                                               | 0.301                                                                  | 0.303                                                   | 0.314                                                         |
| rs17649553  | 17 | 43994648      | T            | 0.189                                                               | 0.231                                                                  | 0.187                                                   | 0.228                                                         |
| rs12456492  | 18 | 40673380      | G            | 0.328                                                               | 0.300                                                                  | 0.337                                                   | 0.316                                                         |
| rs117022814 | 19 | 2209647       | T            | 0.027                                                               | 0.023                                                                  | 0.022                                                   | 0.022                                                         |
| rs10402629  | 19 | 2324458       | G            | 0.244                                                               | 0.225                                                                  | 0.217                                                   | 0.218                                                         |
| rs62120679  | 19 | 2363319       | T            | 0.321                                                               | 0.300                                                                  | NA                                                      | NA                                                            |
| rs55785911  | 20 | 3153503       | A            | 0.357                                                               | 0.374                                                                  | 0.368                                                   | 0.386                                                         |
| rs8118008   | 20 | 3168166       | G            | 0.341                                                               | 0.359                                                                  | NA                                                      | NA                                                            |
| rs2823357   | 21 | 16914905      | A            | 0.382                                                               | 0.375                                                                  | 0.383                                                   | 0.378                                                         |

Supplementary Figure 1 (pages 24 - 55): Regional association plots. 32 regional association plots for SNPs from discovery phase analyses +/- 1 Mb from most significant SNP per locus in Table 1. The  $r^2$  pattern is based on most significant SNP per locus, based on the 283 European ancestry samples from the August 2010 release of the 1000 genomes project dataset. Secondary signals are annotated in text as per their description in the conditional analysis section of Table 2. Recombination rates are as per HapMap phase 2 European ancestry samples. Nearest gene or previously published proximal gene names included in table.

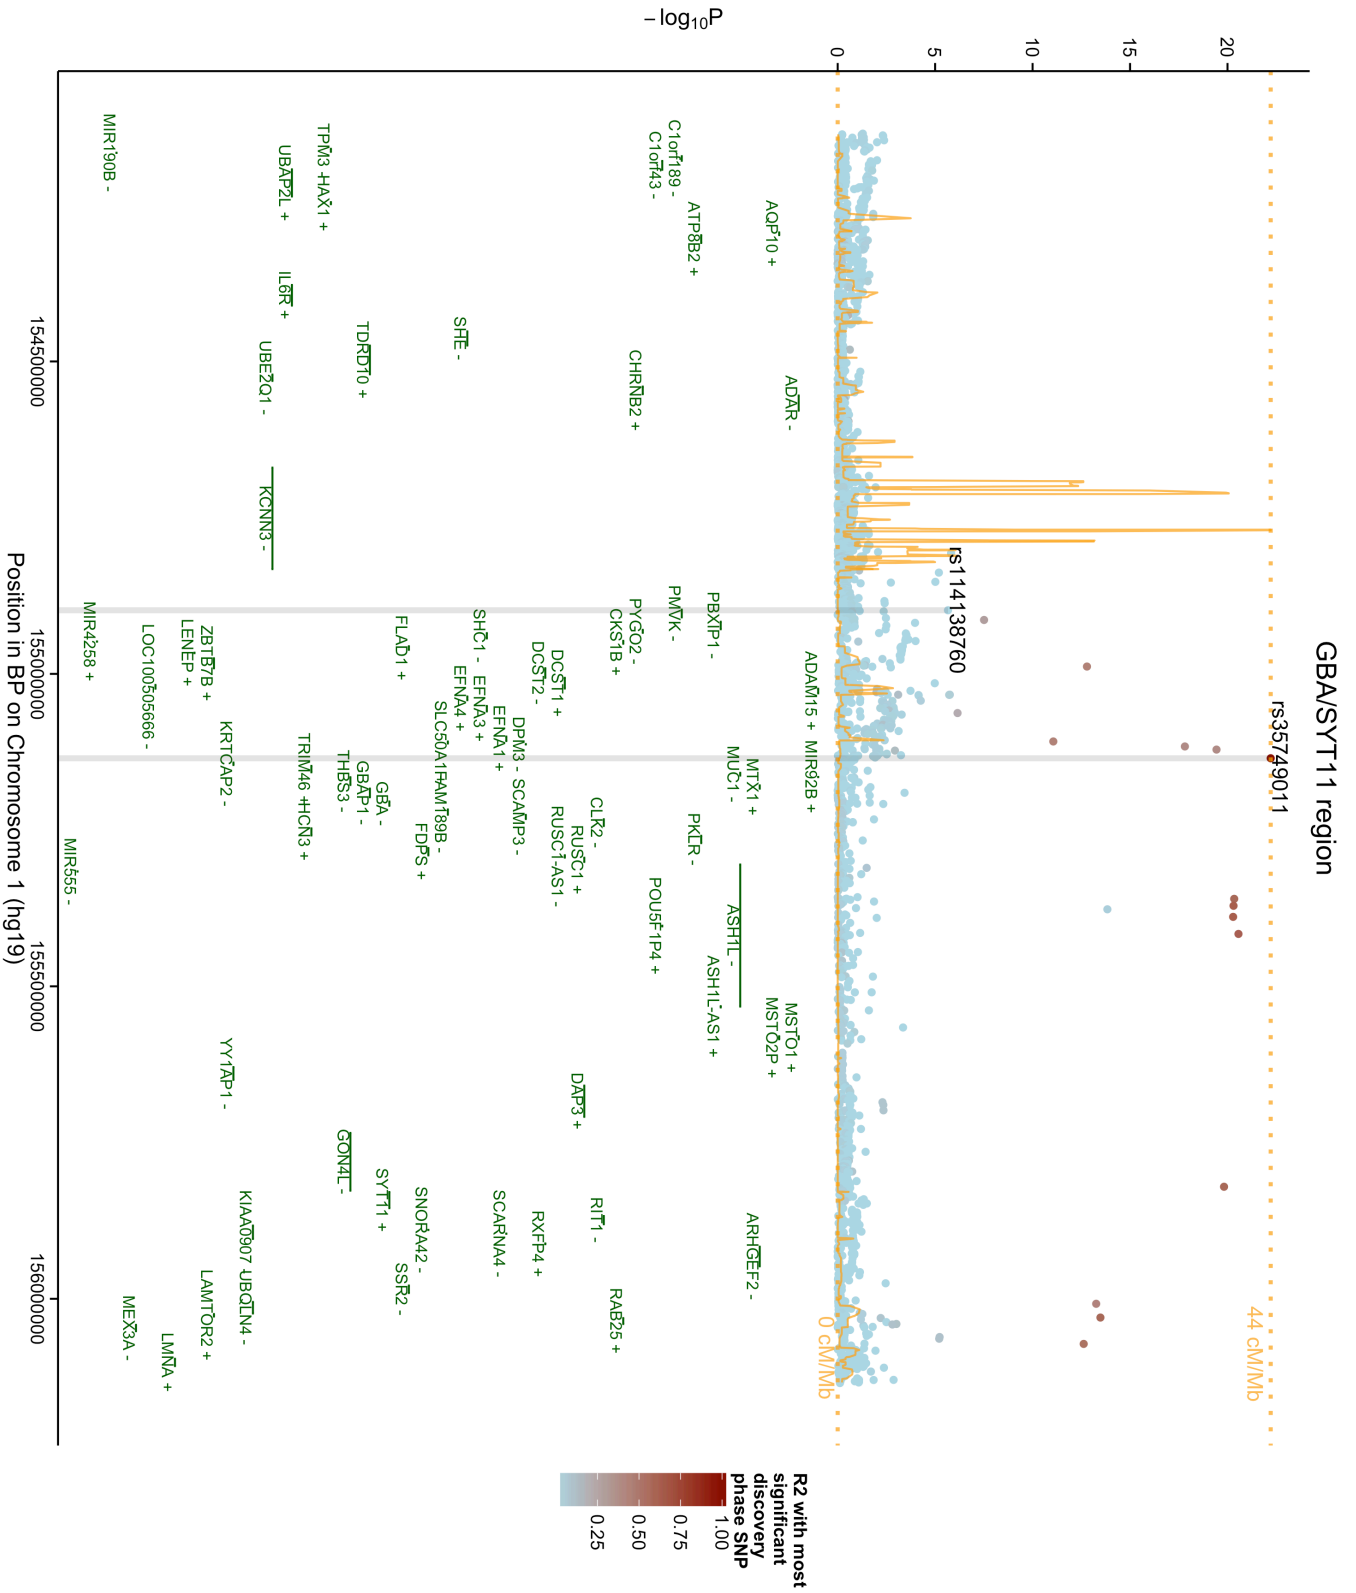



# RAB7L1/NUCKS1 region

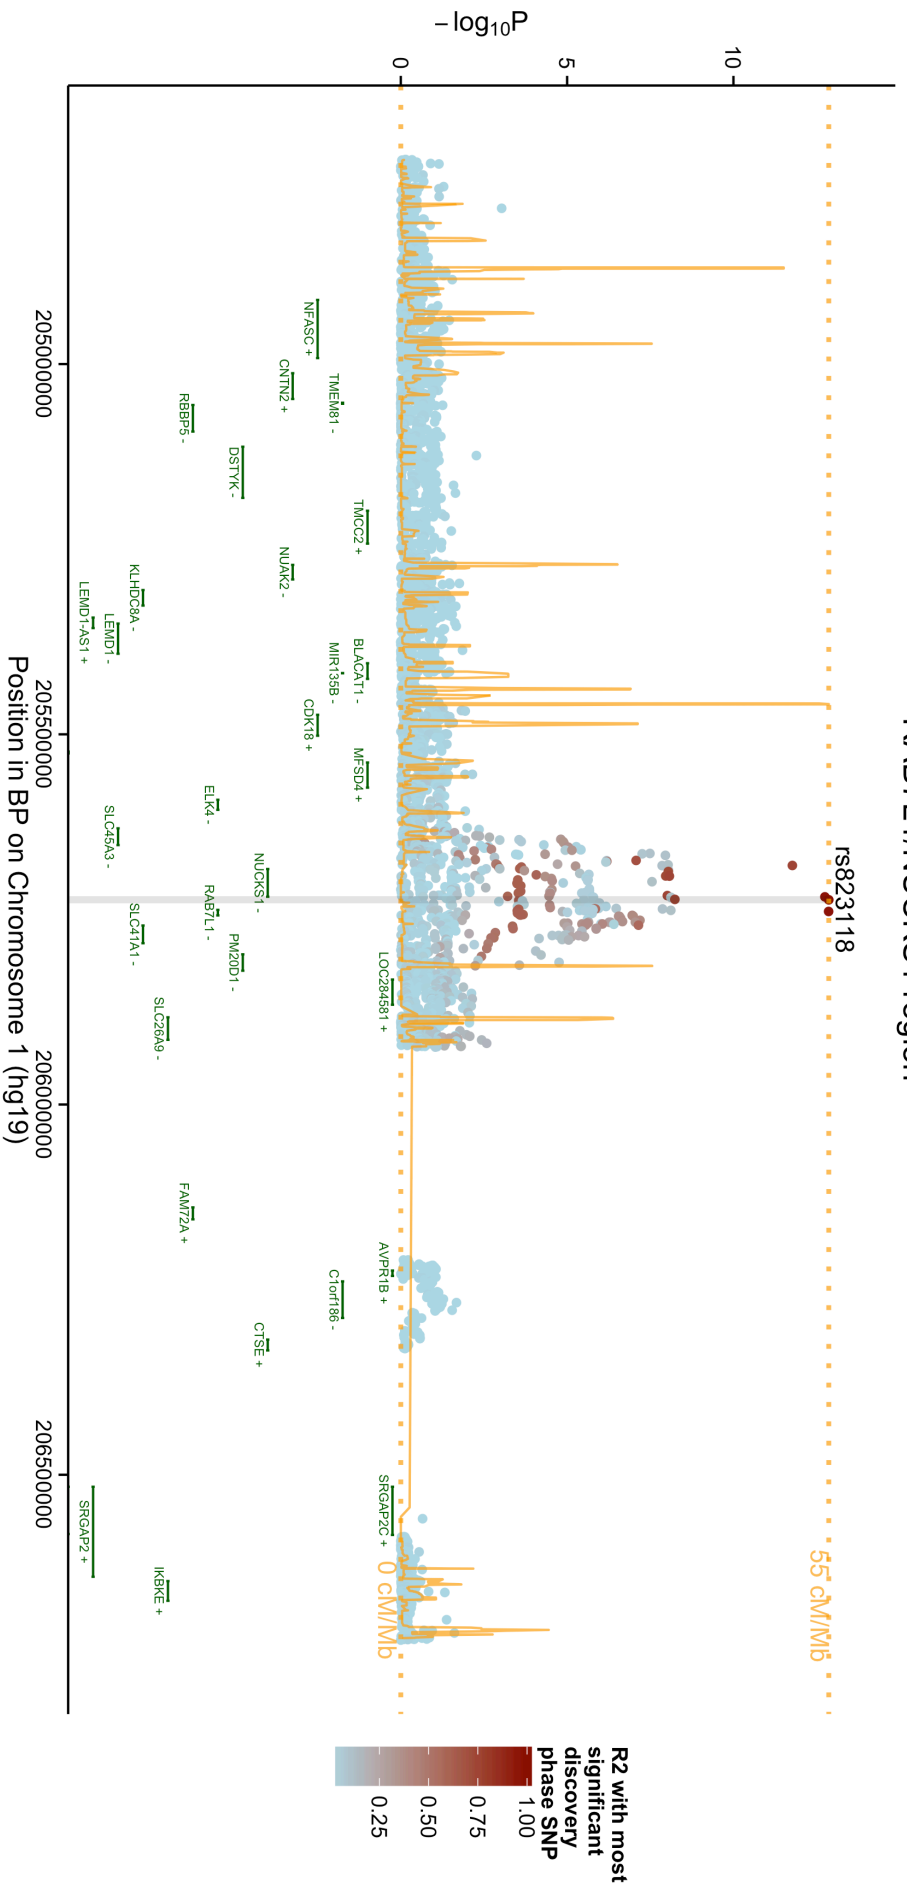

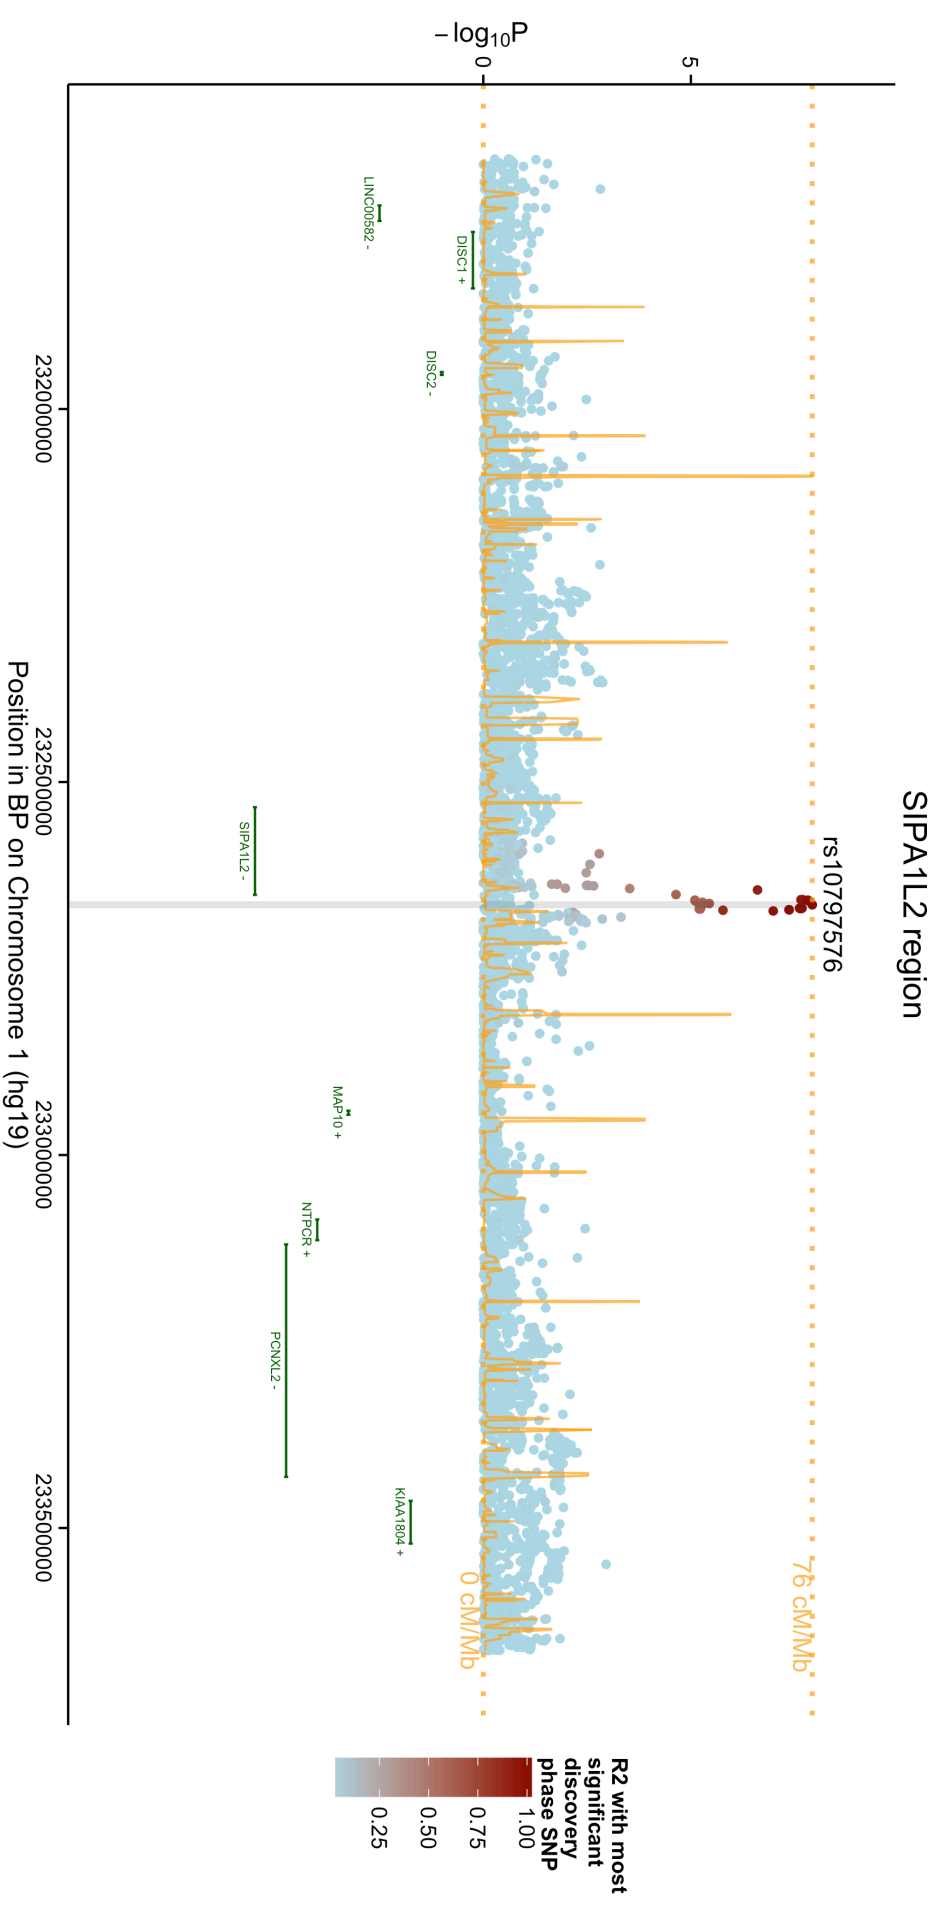

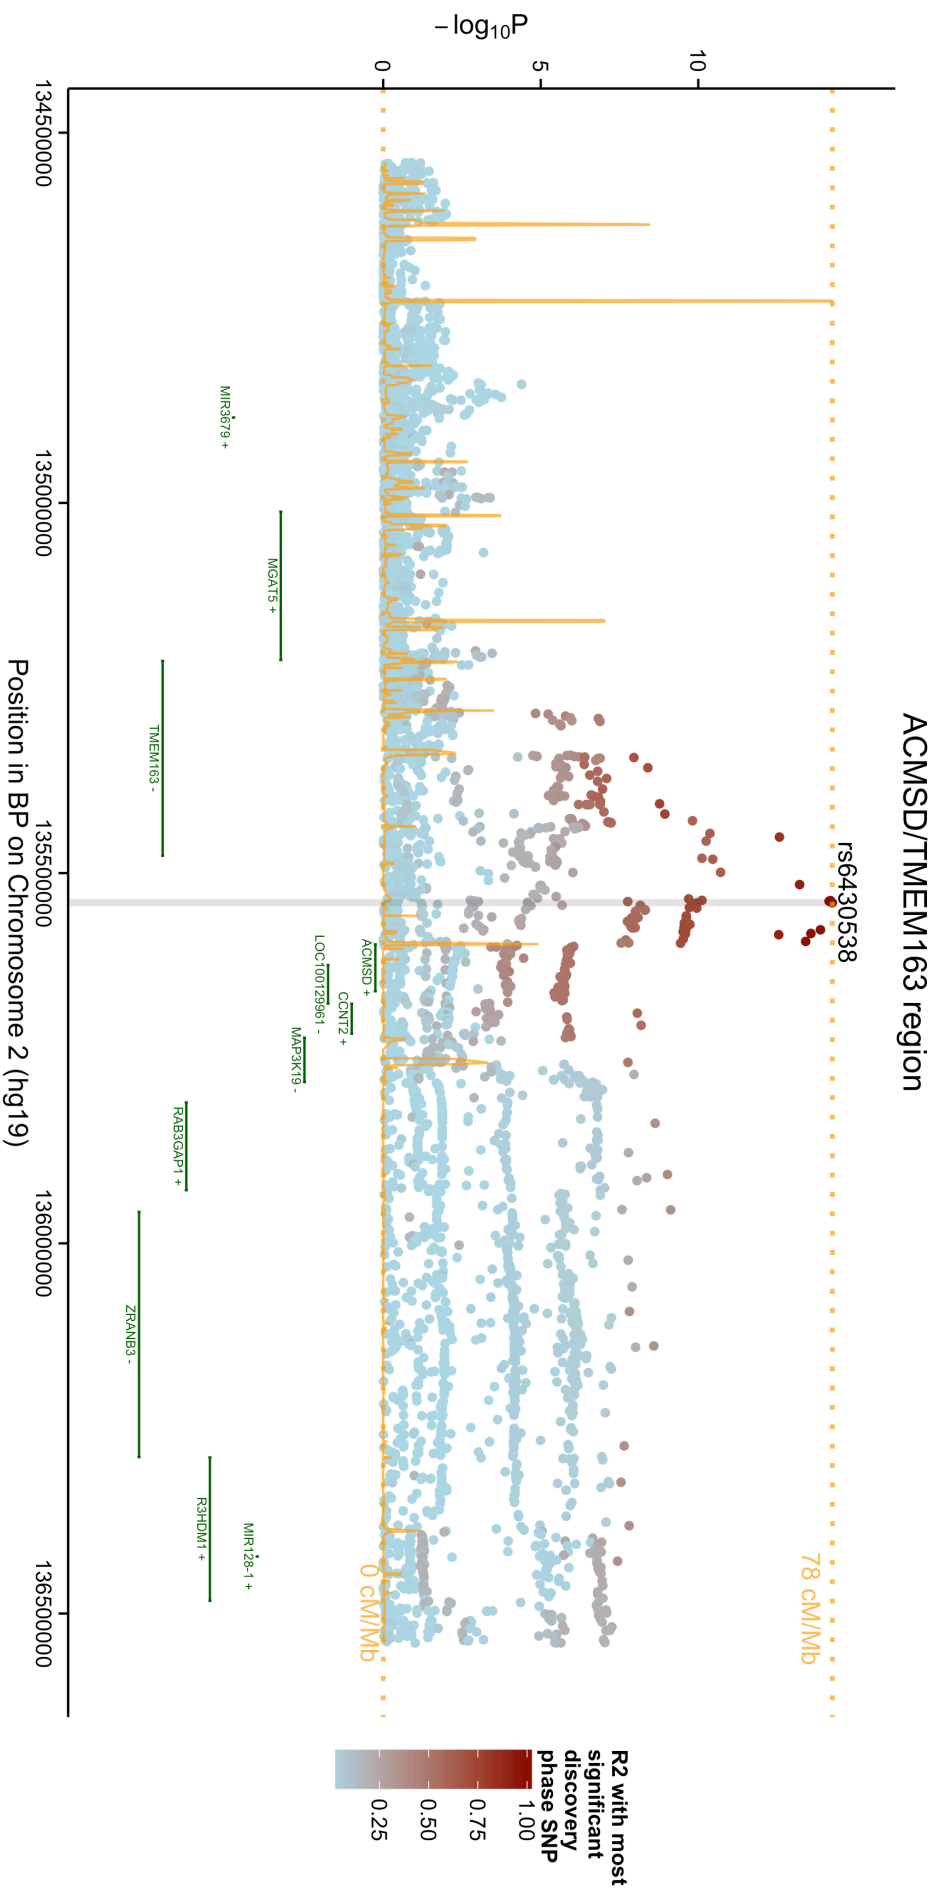

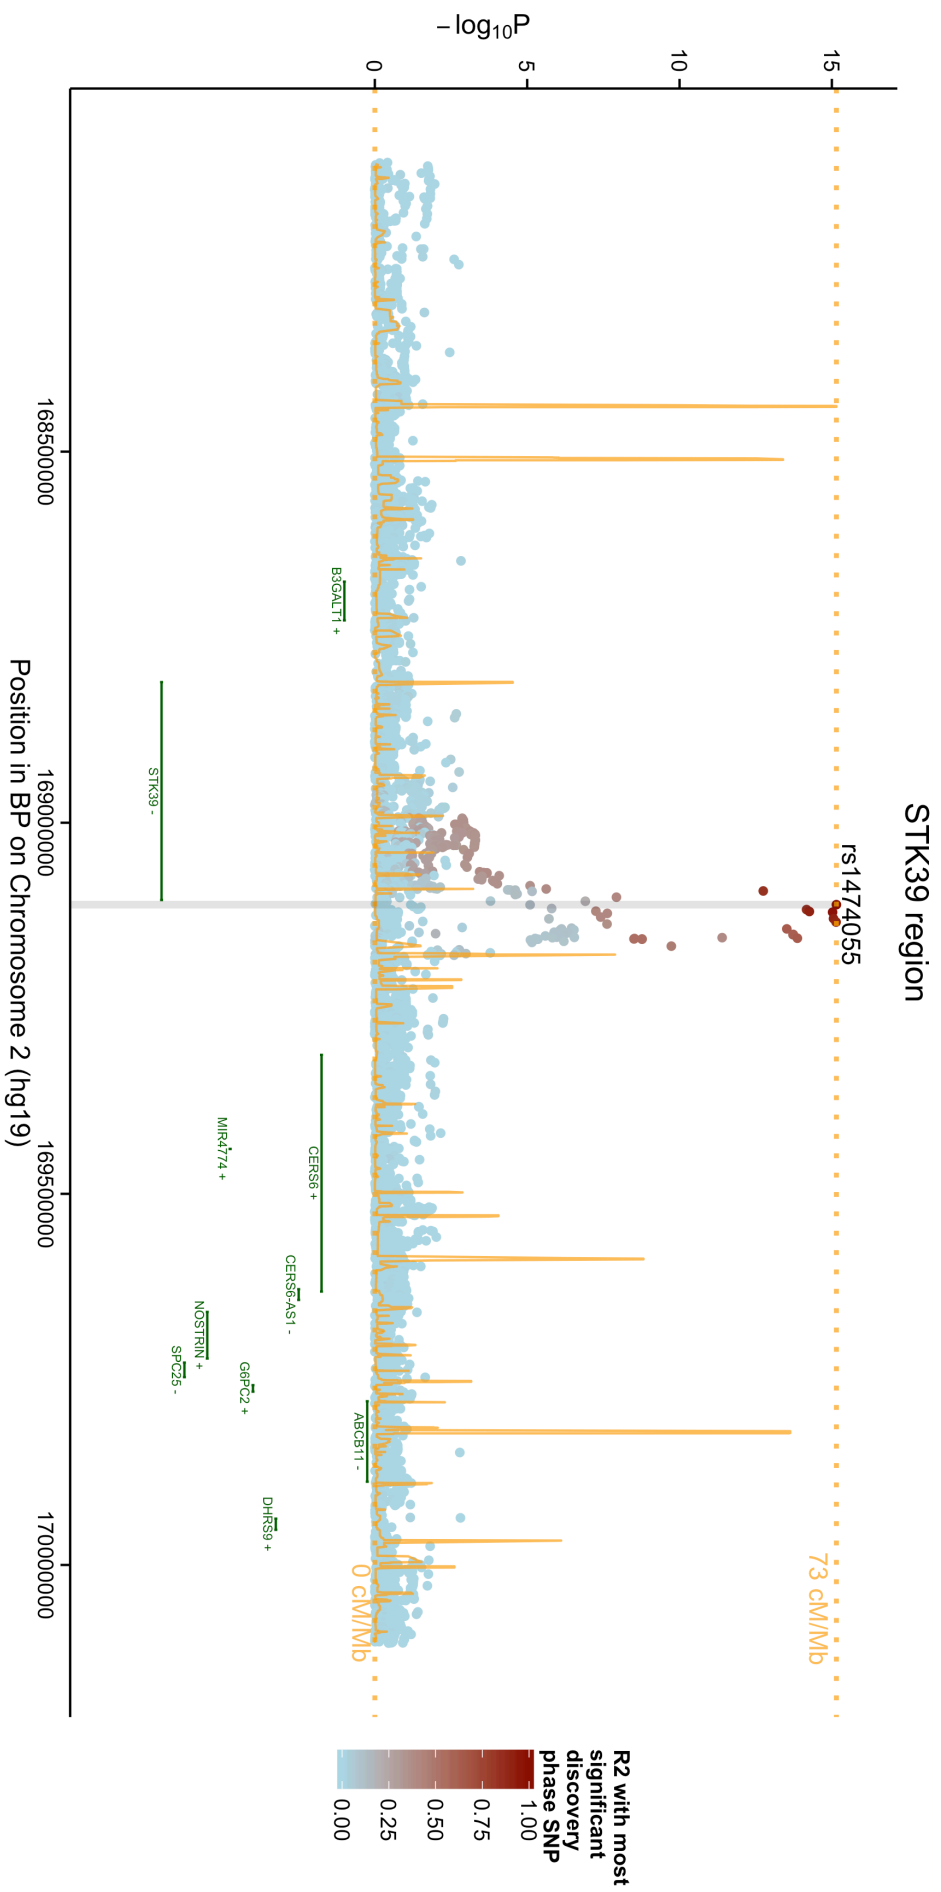

# KRT8P25/APOOP2 region

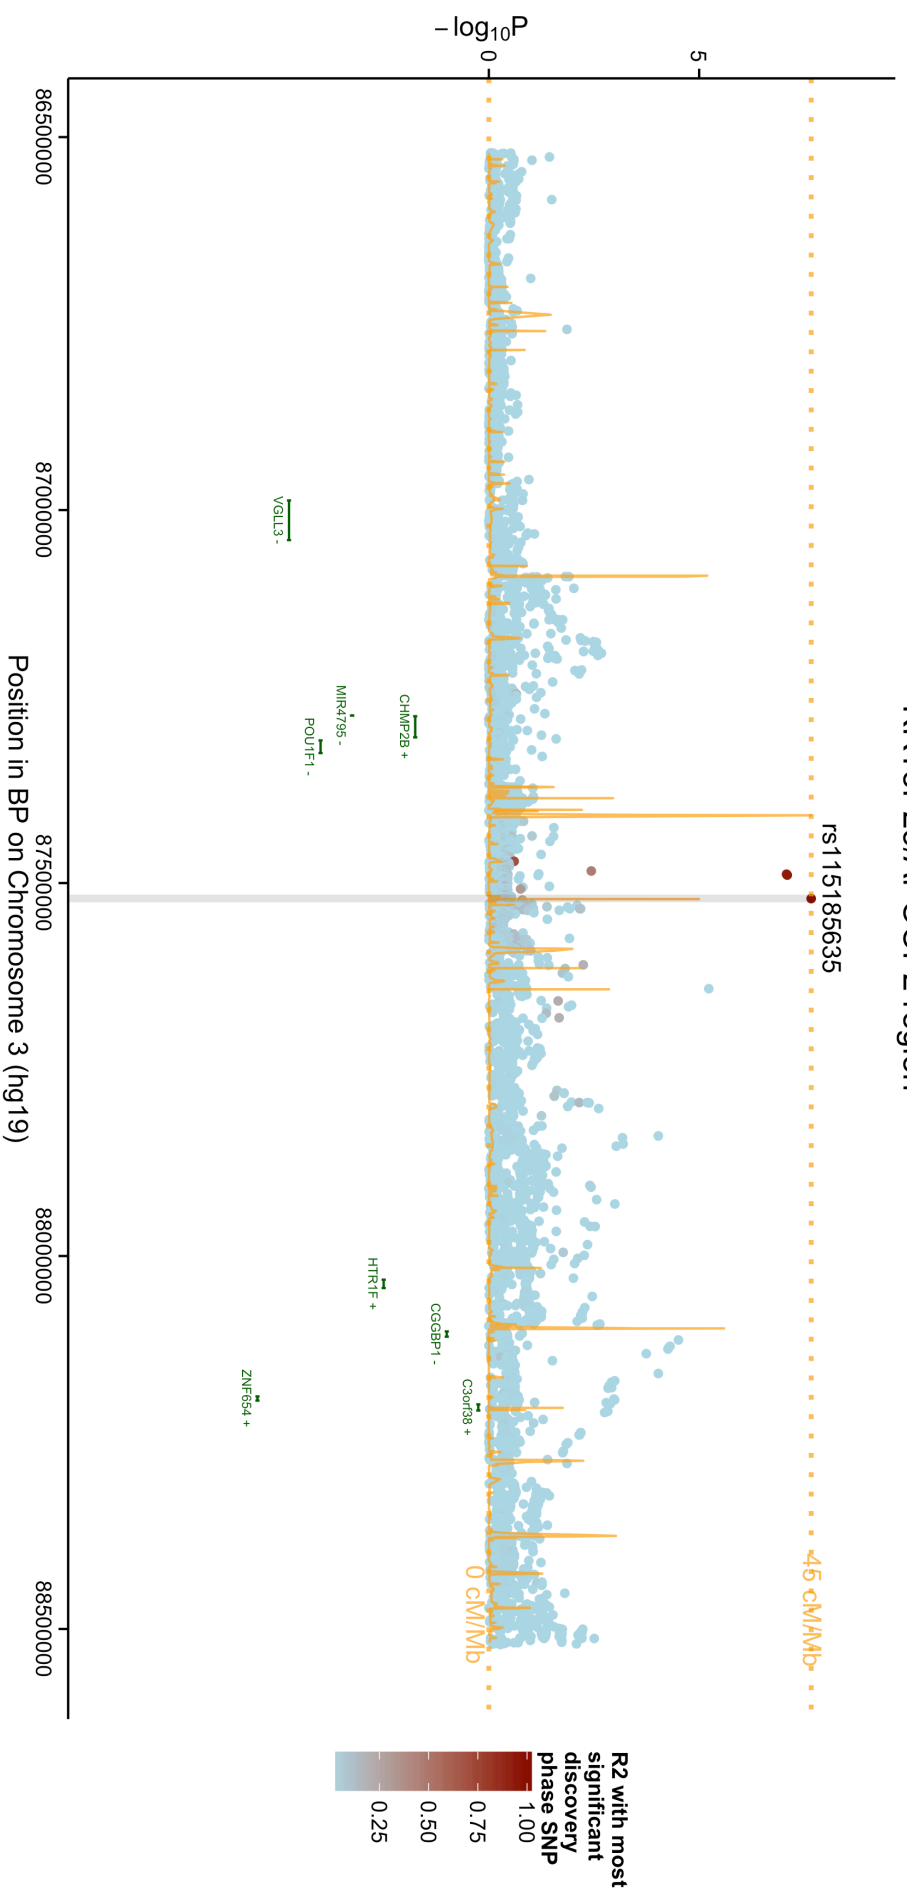

**R2 with most significant discovered phase SNP**  
1.00  
0.75  
0.50  
0.25

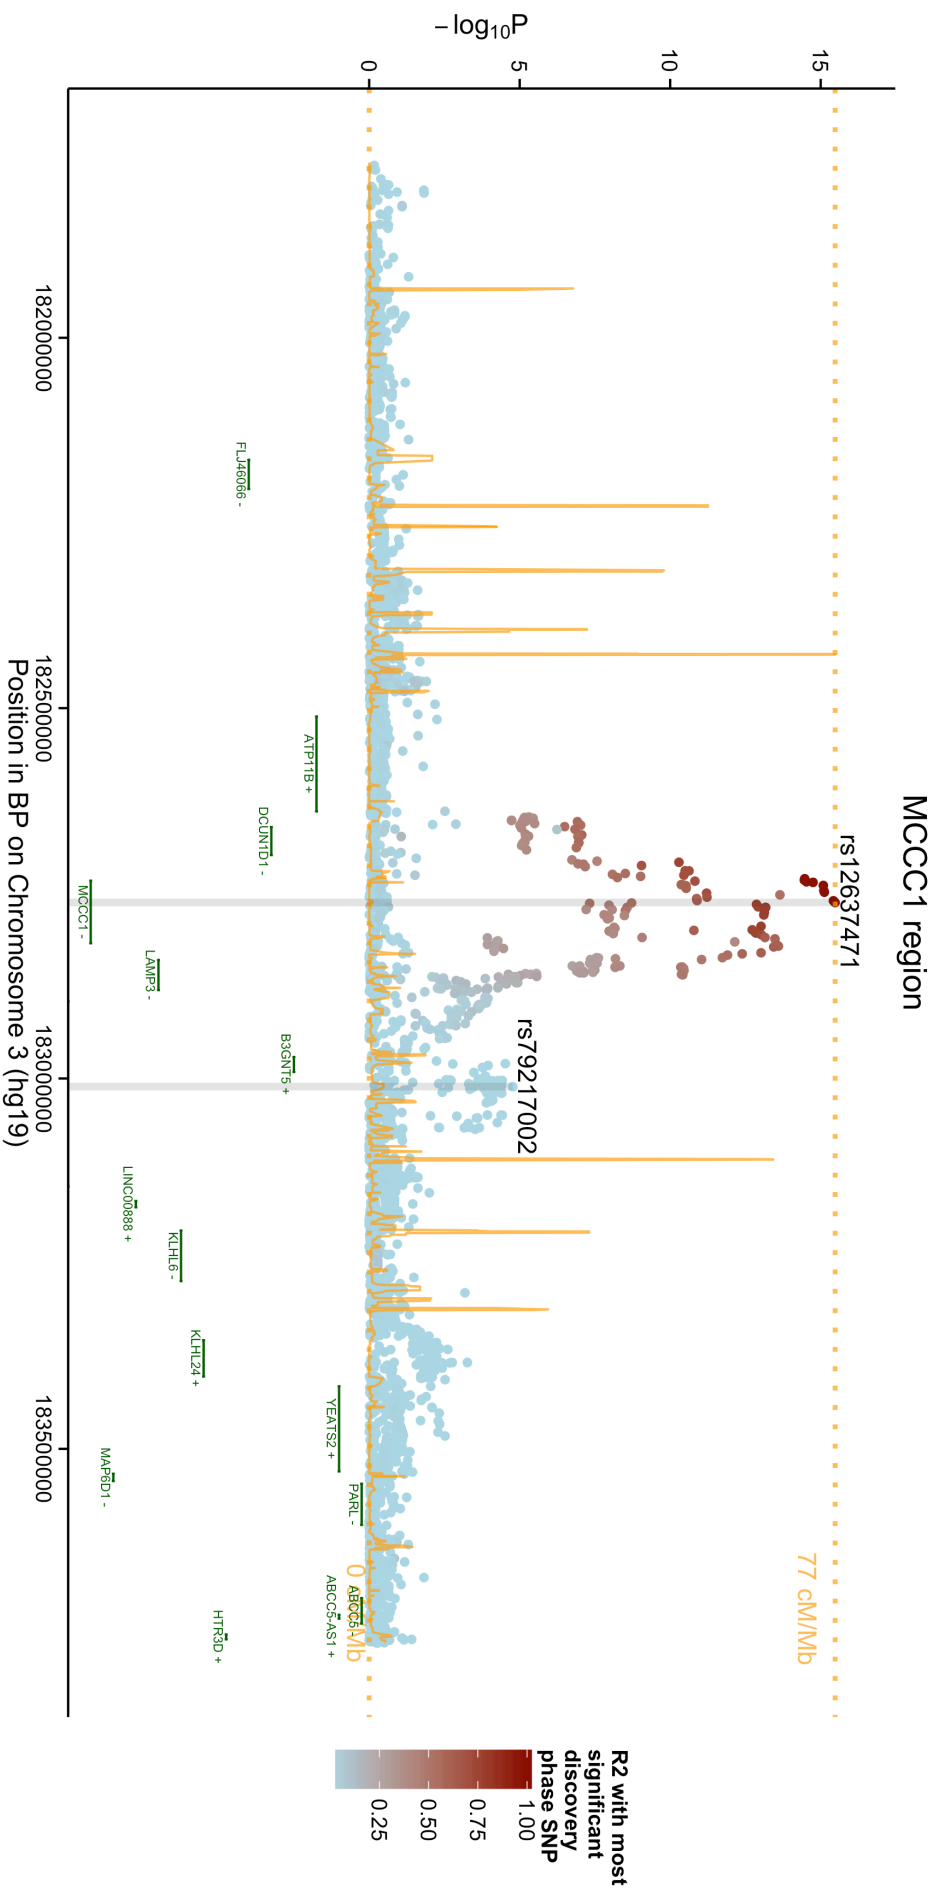

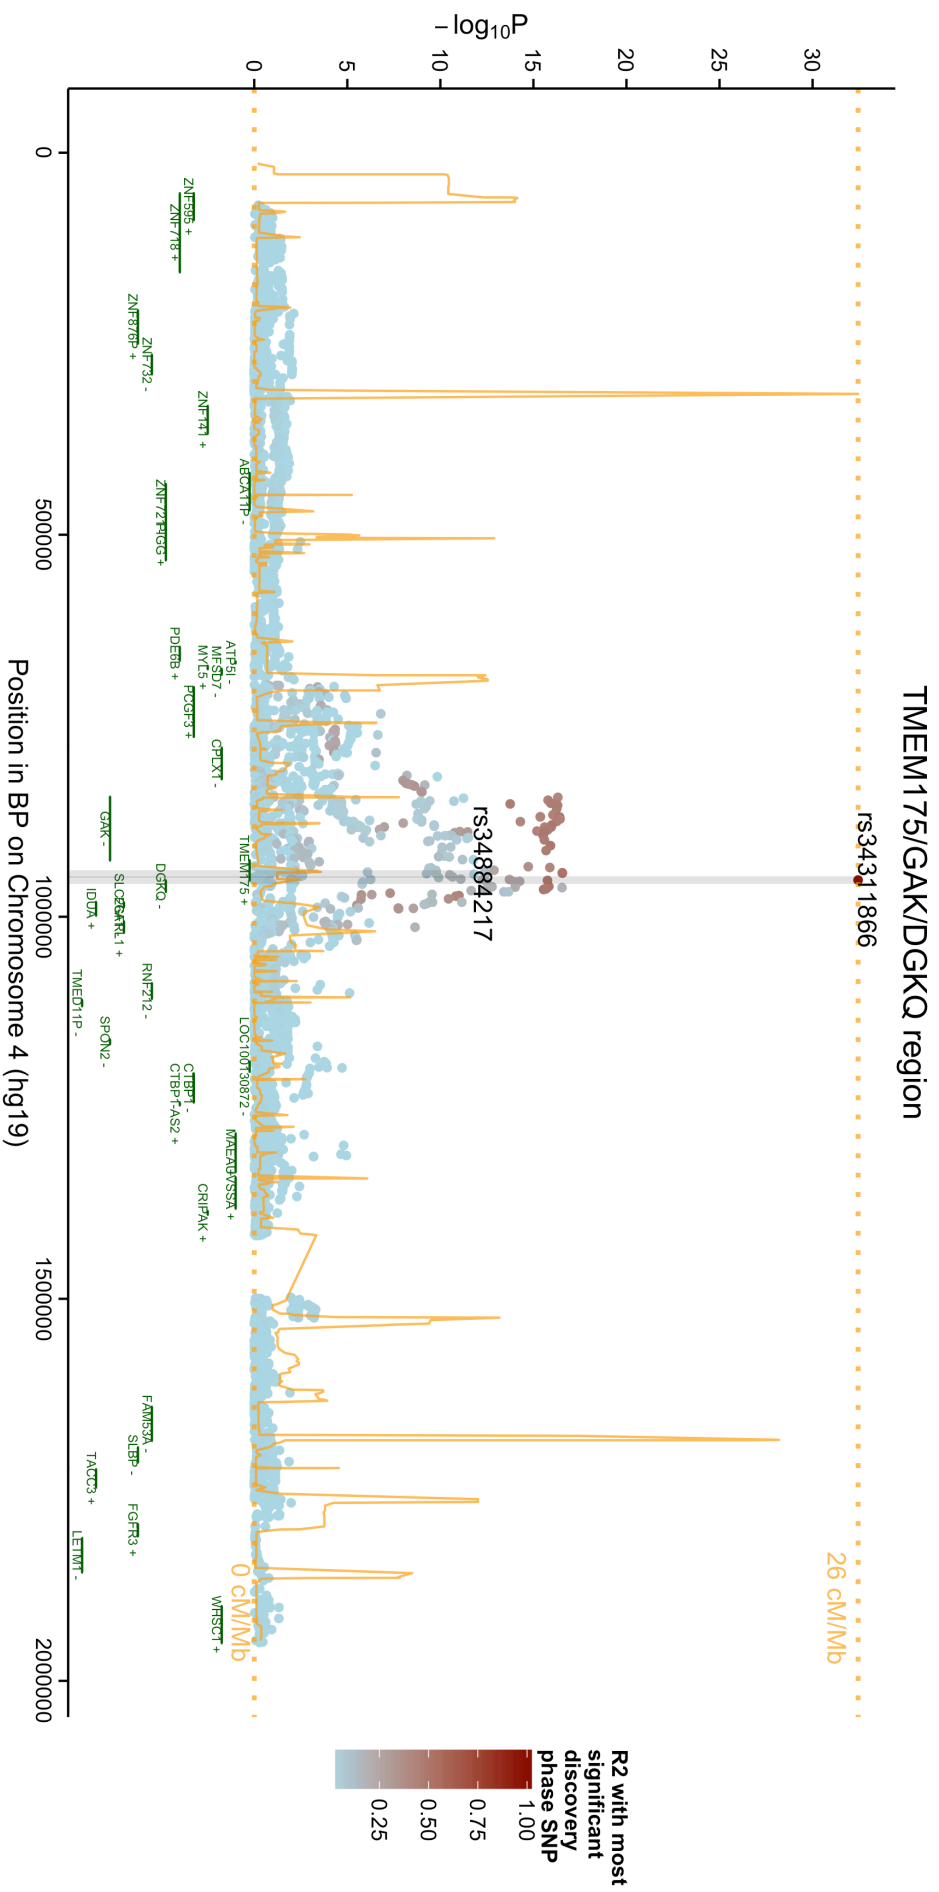

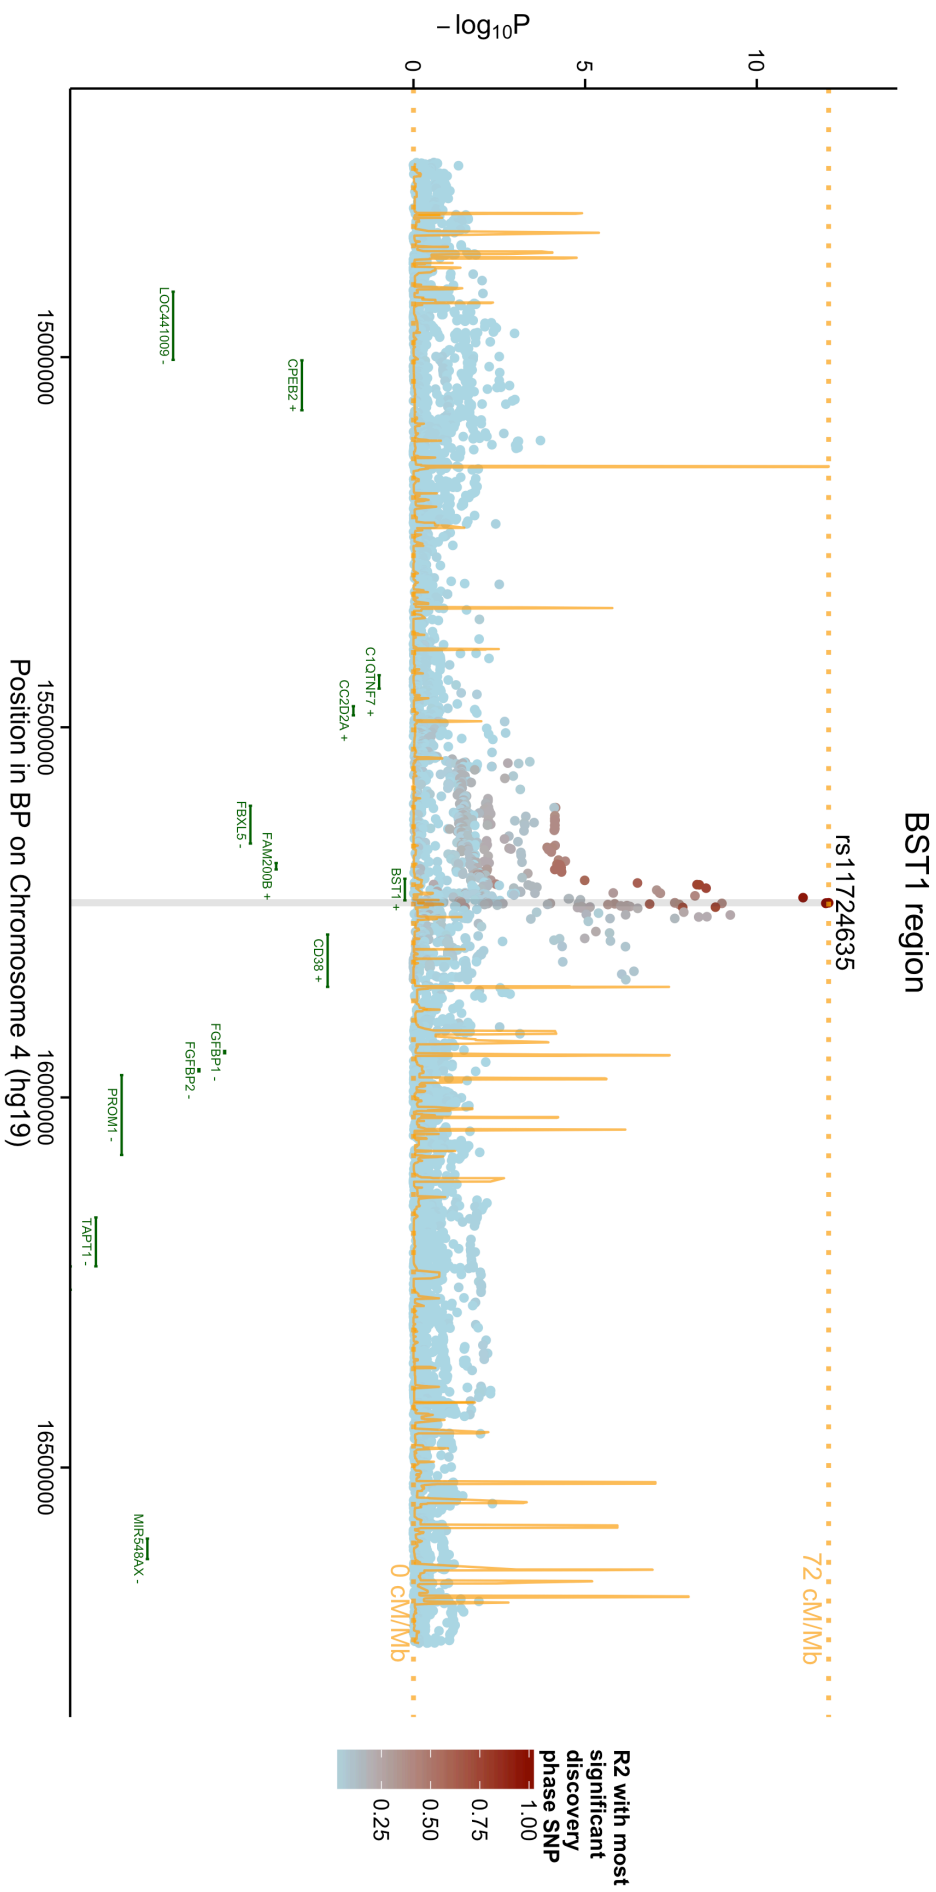



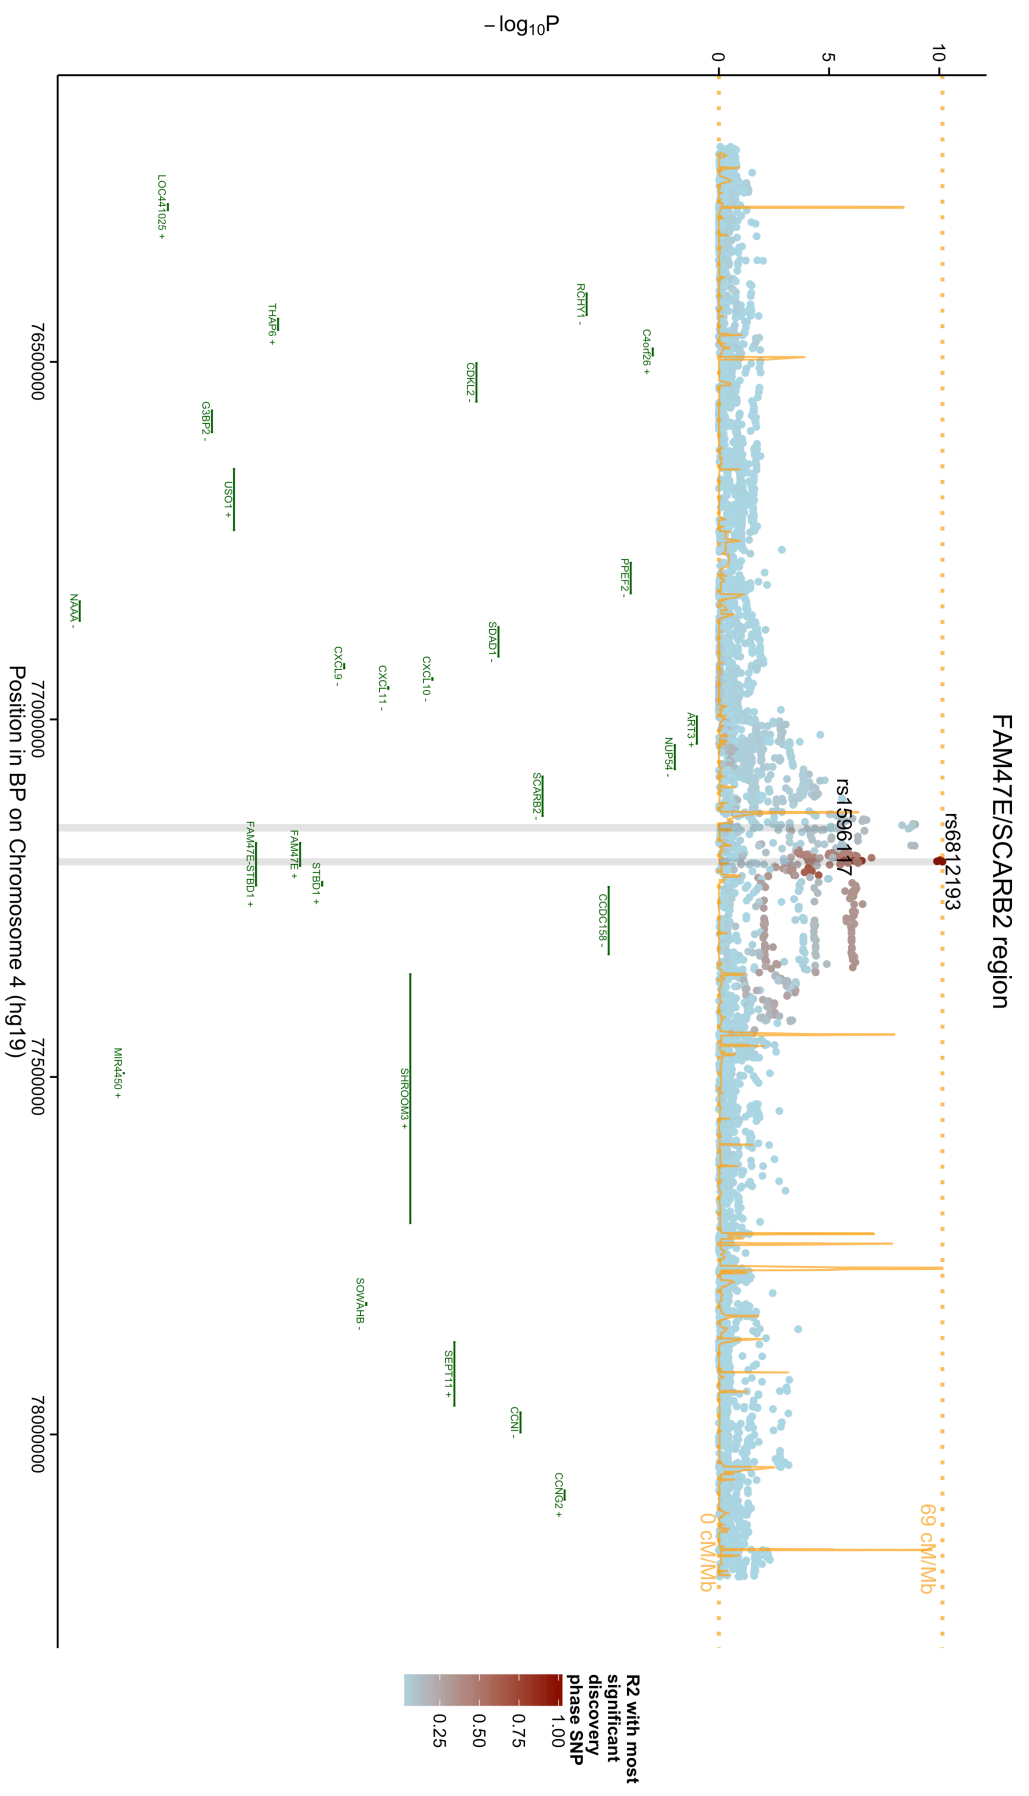

R2 with most significant discover phase SNP

1.00

0.75

0.50

0.25

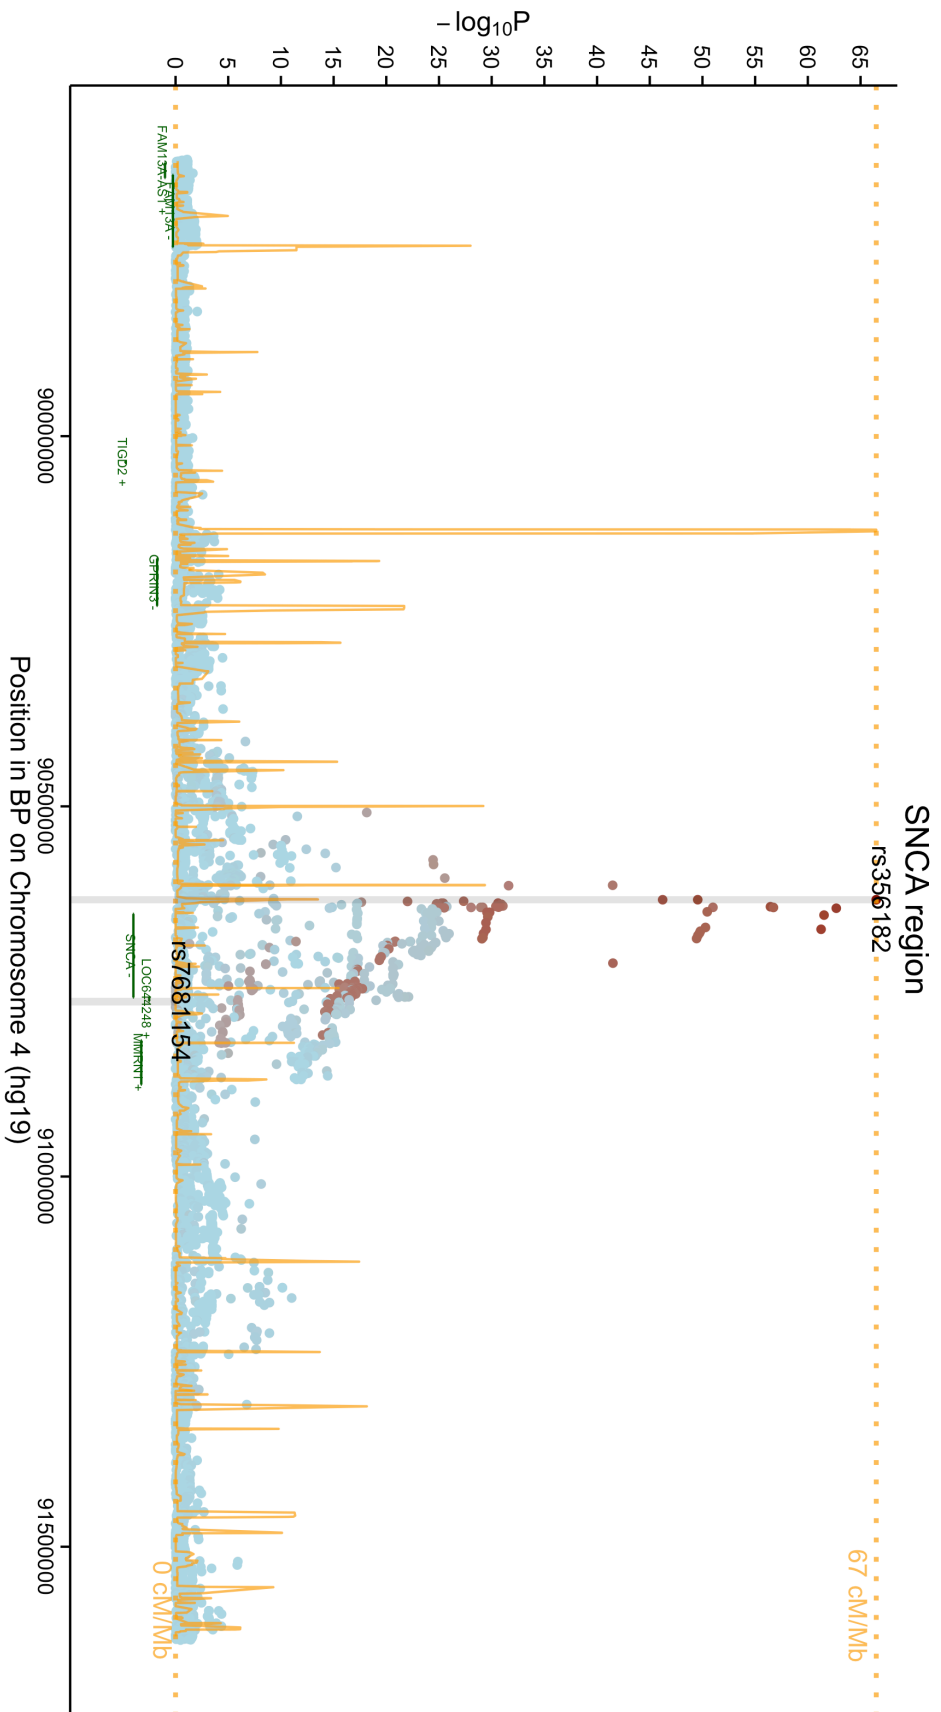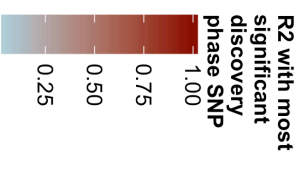

# HLA-DQB1 region

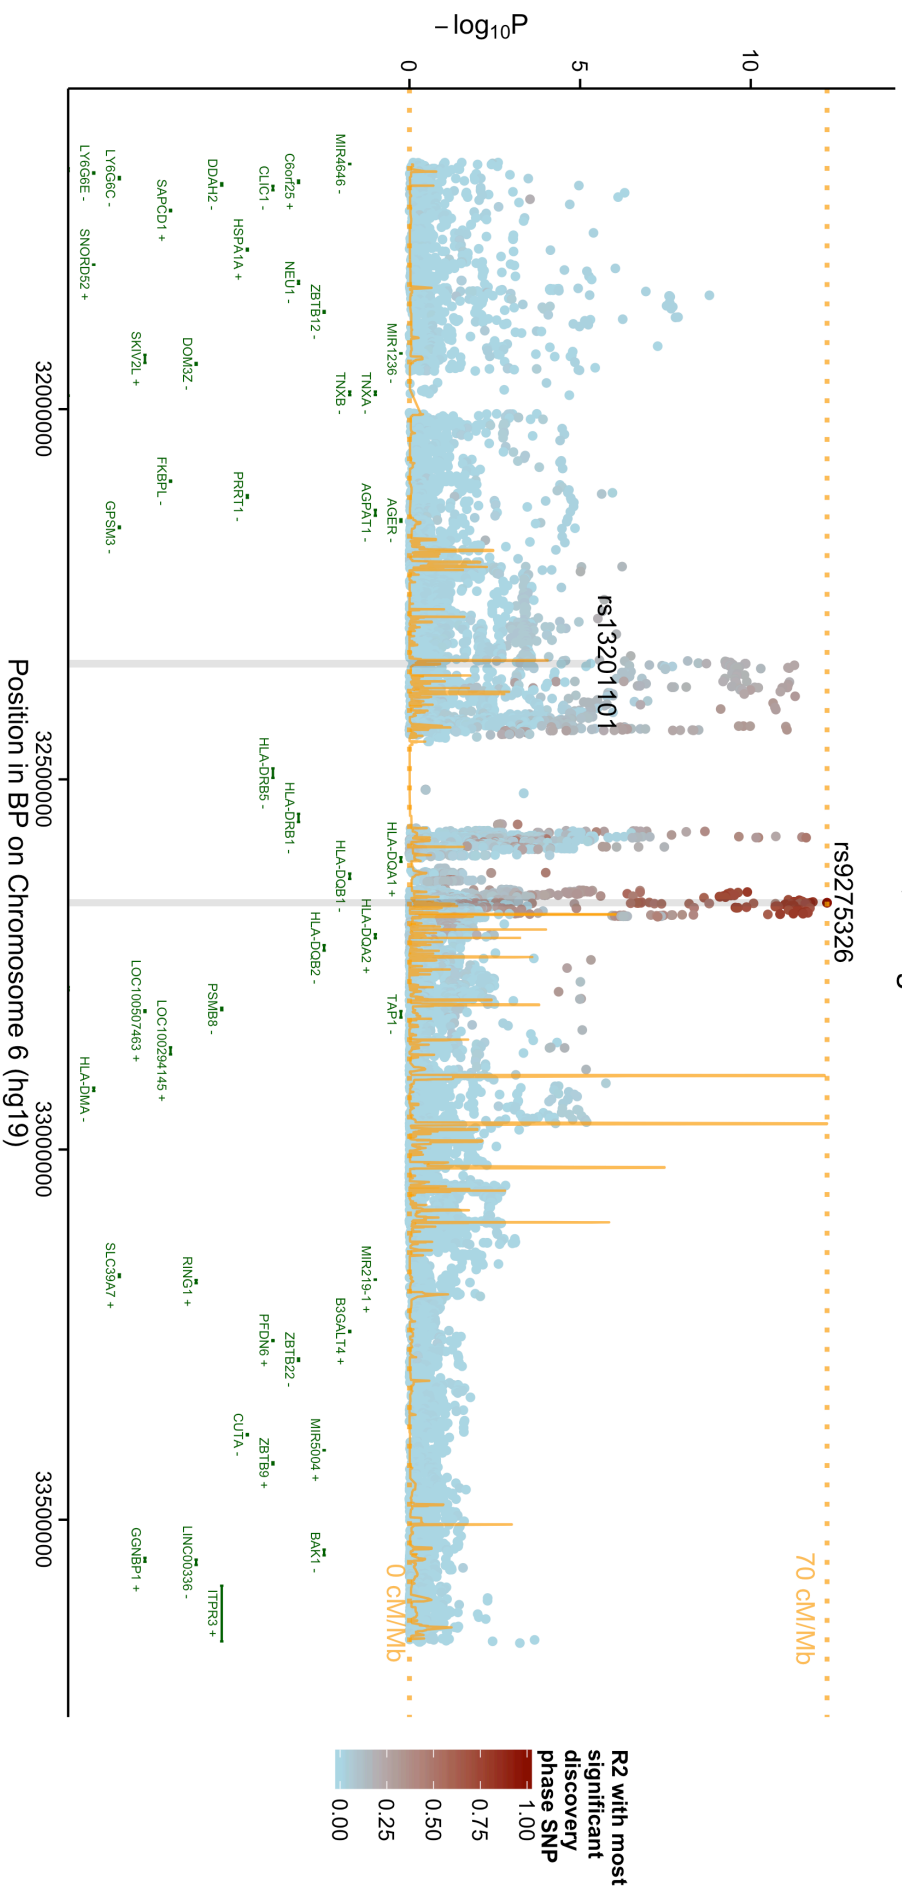

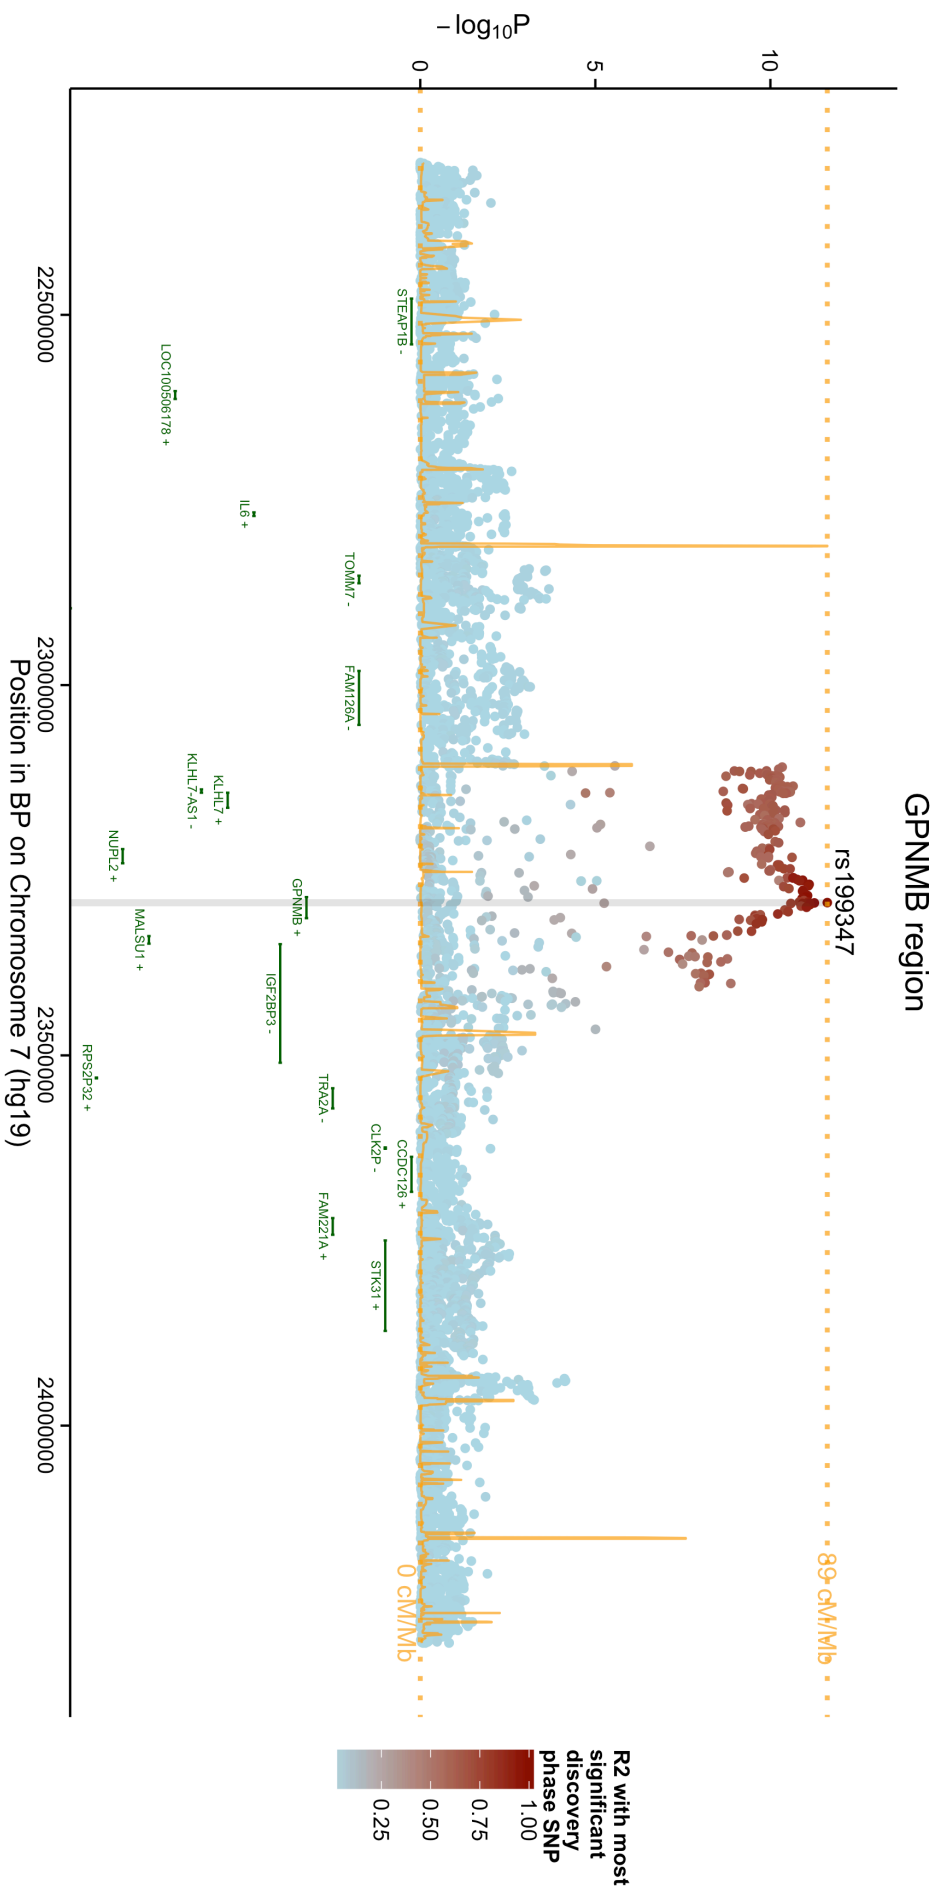

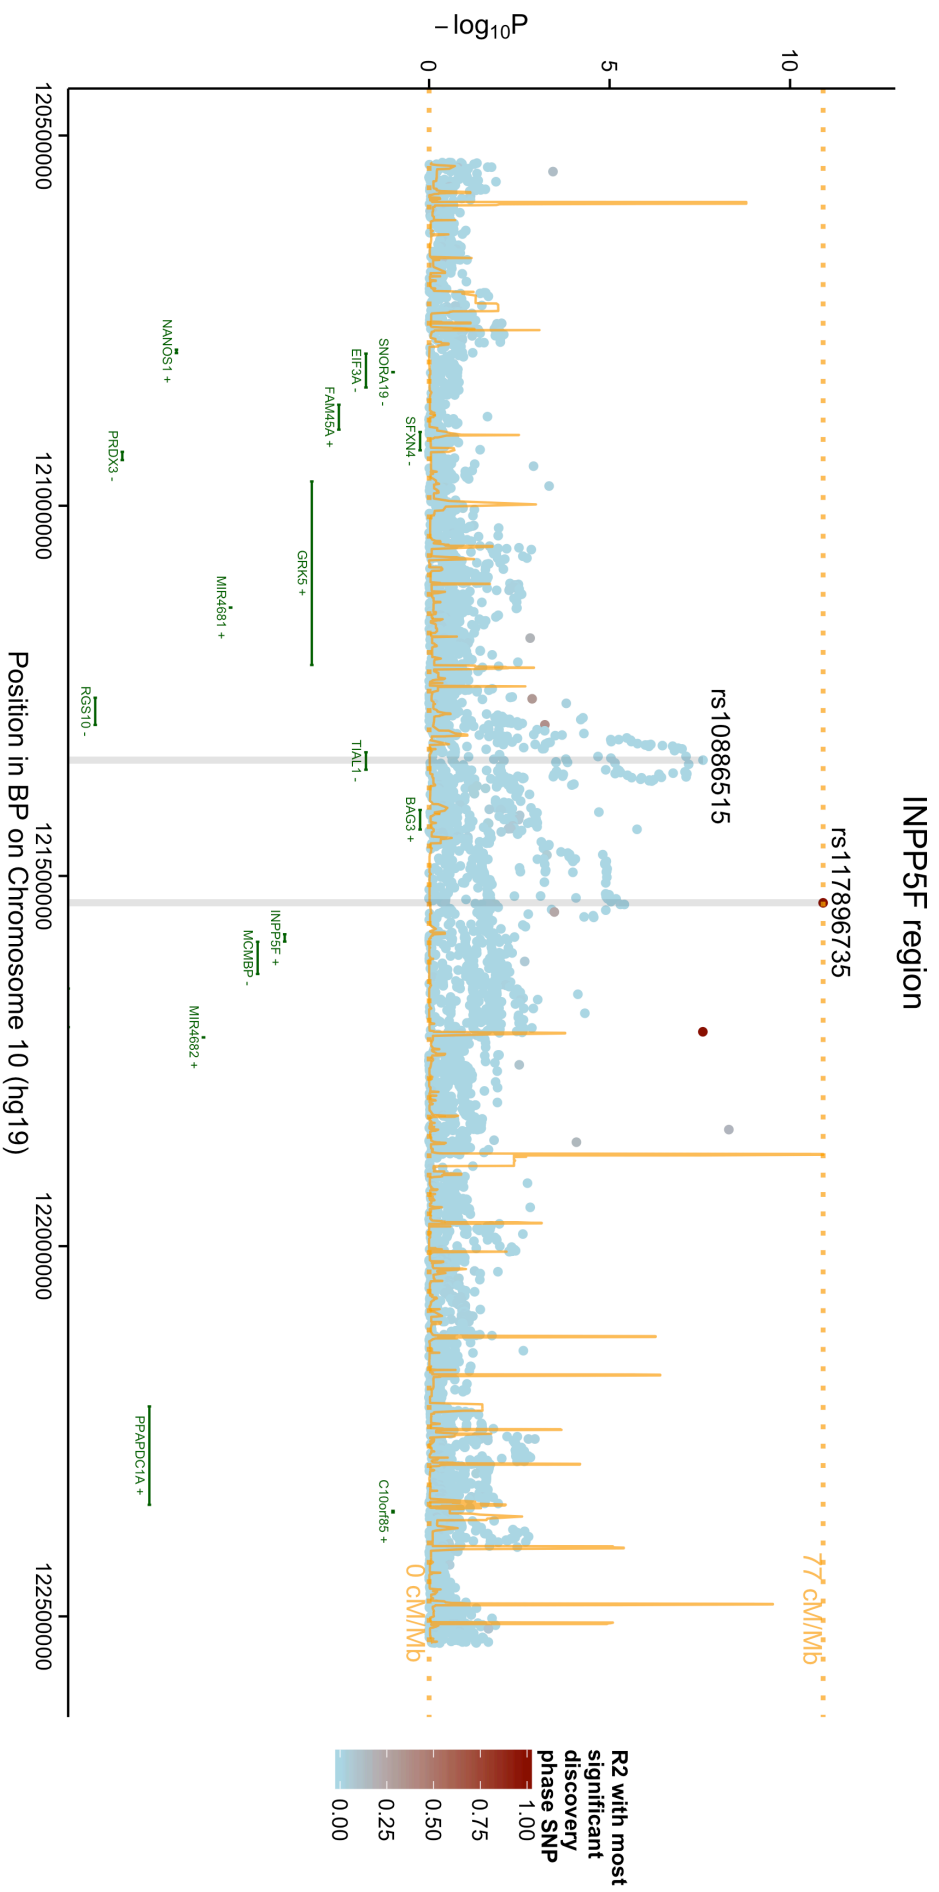

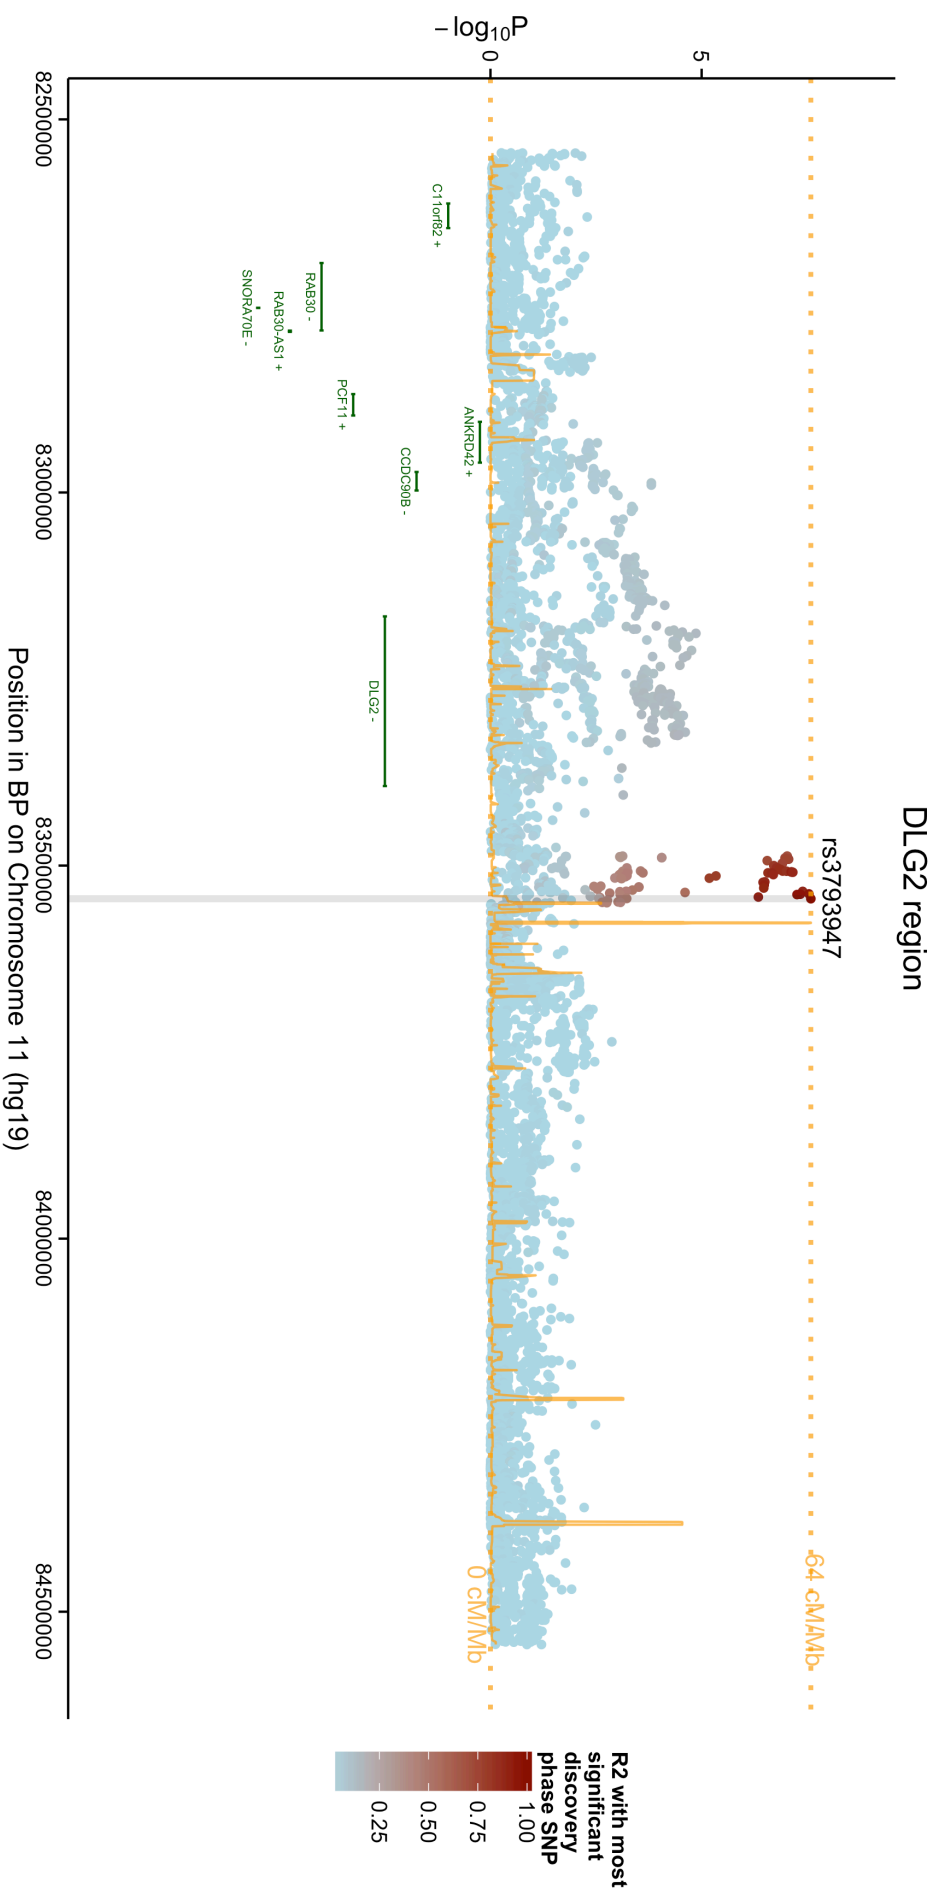

R2 with most significant discover phase SNP

1.00  
0.75  
0.50  
0.25

# LOC283174 region

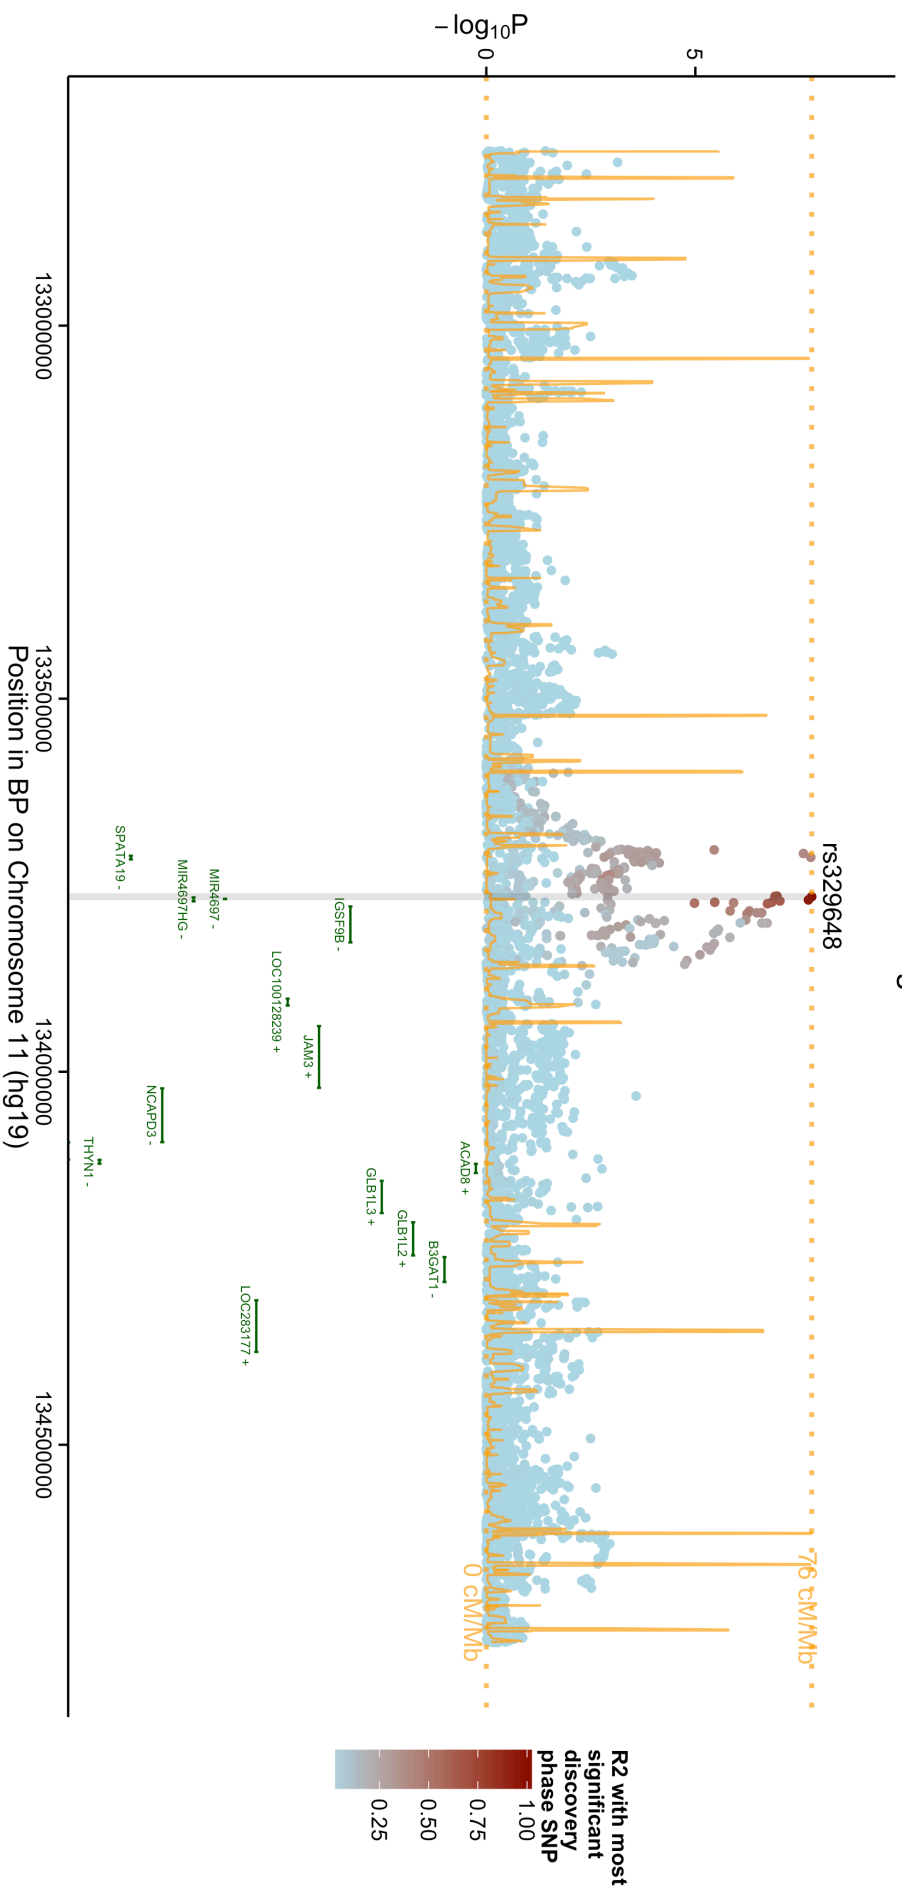

R2 with most significant discover phase SNP

1.00  
0.75  
0.50  
0.25

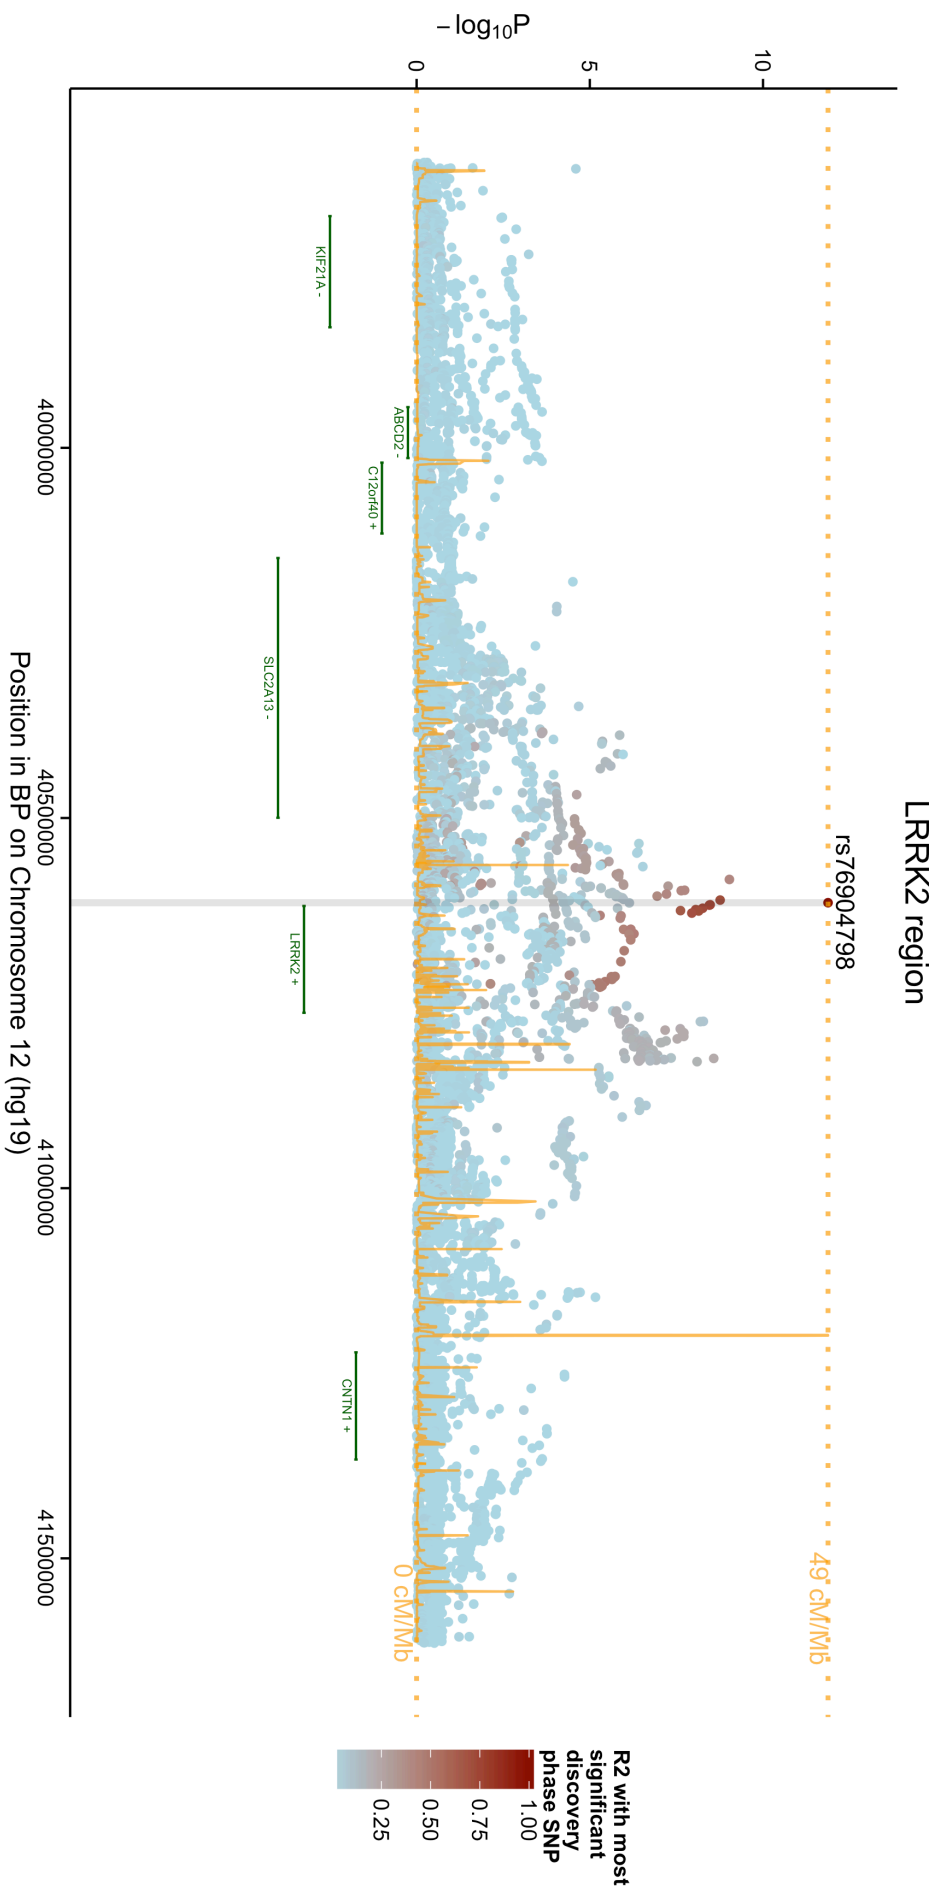



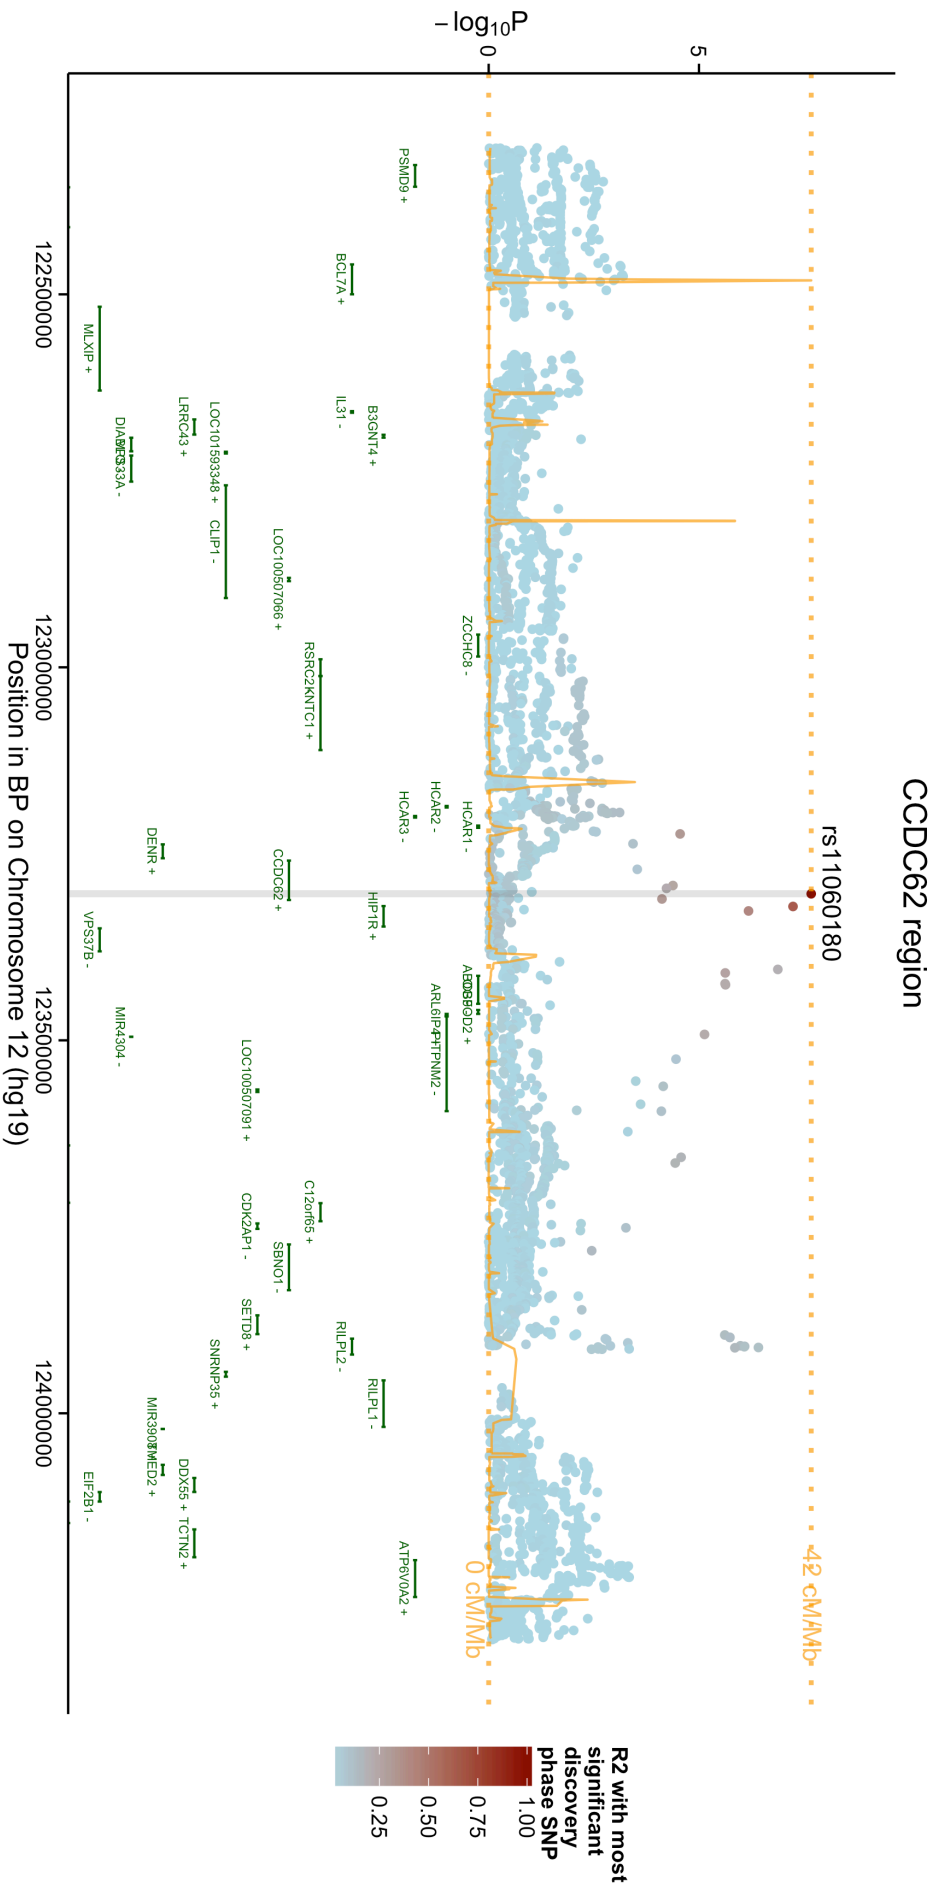

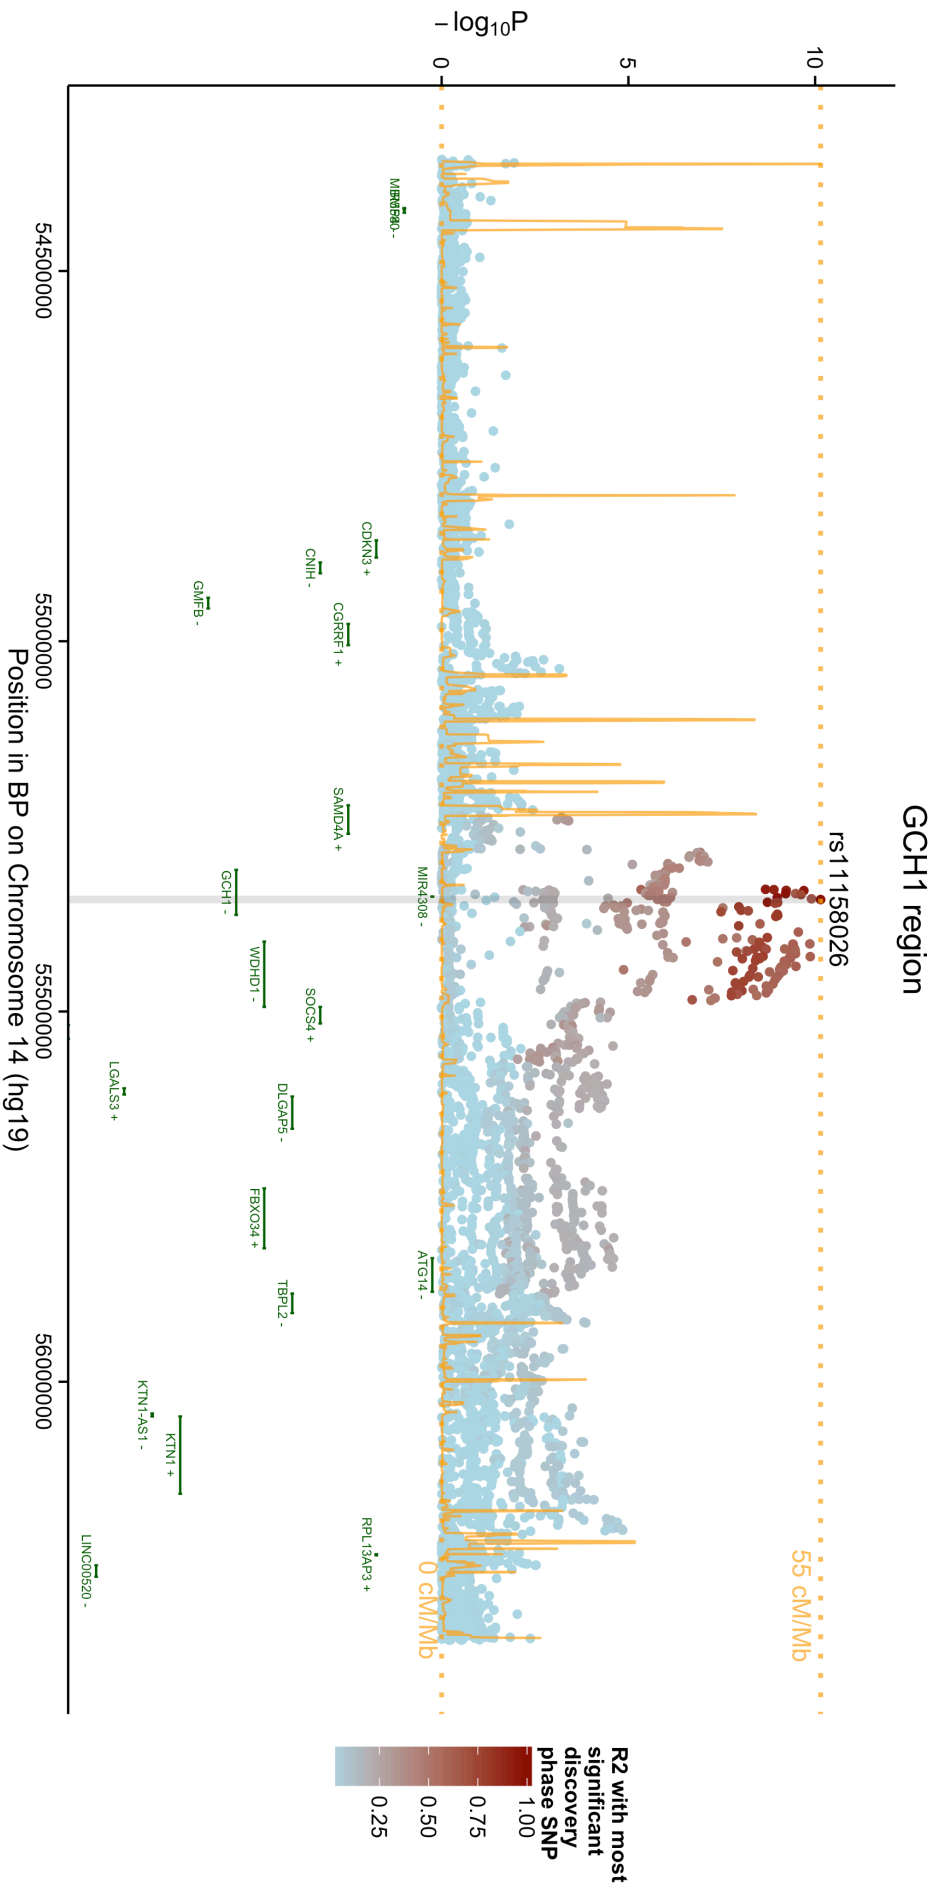

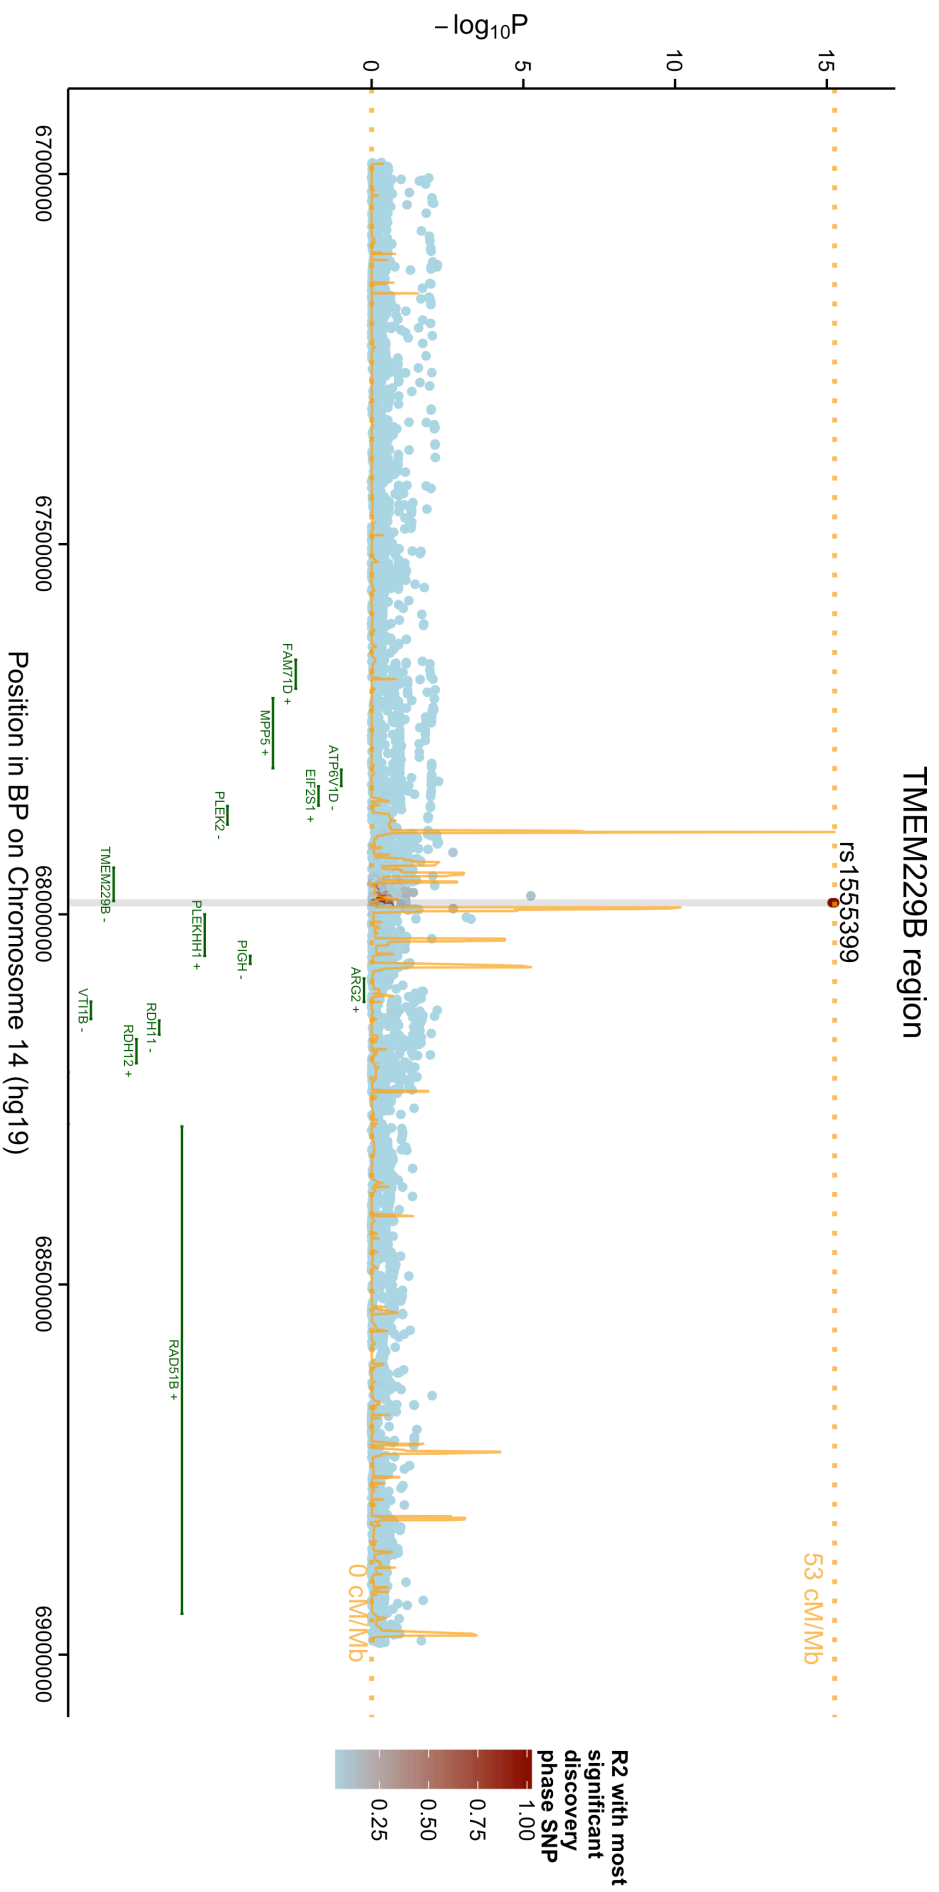

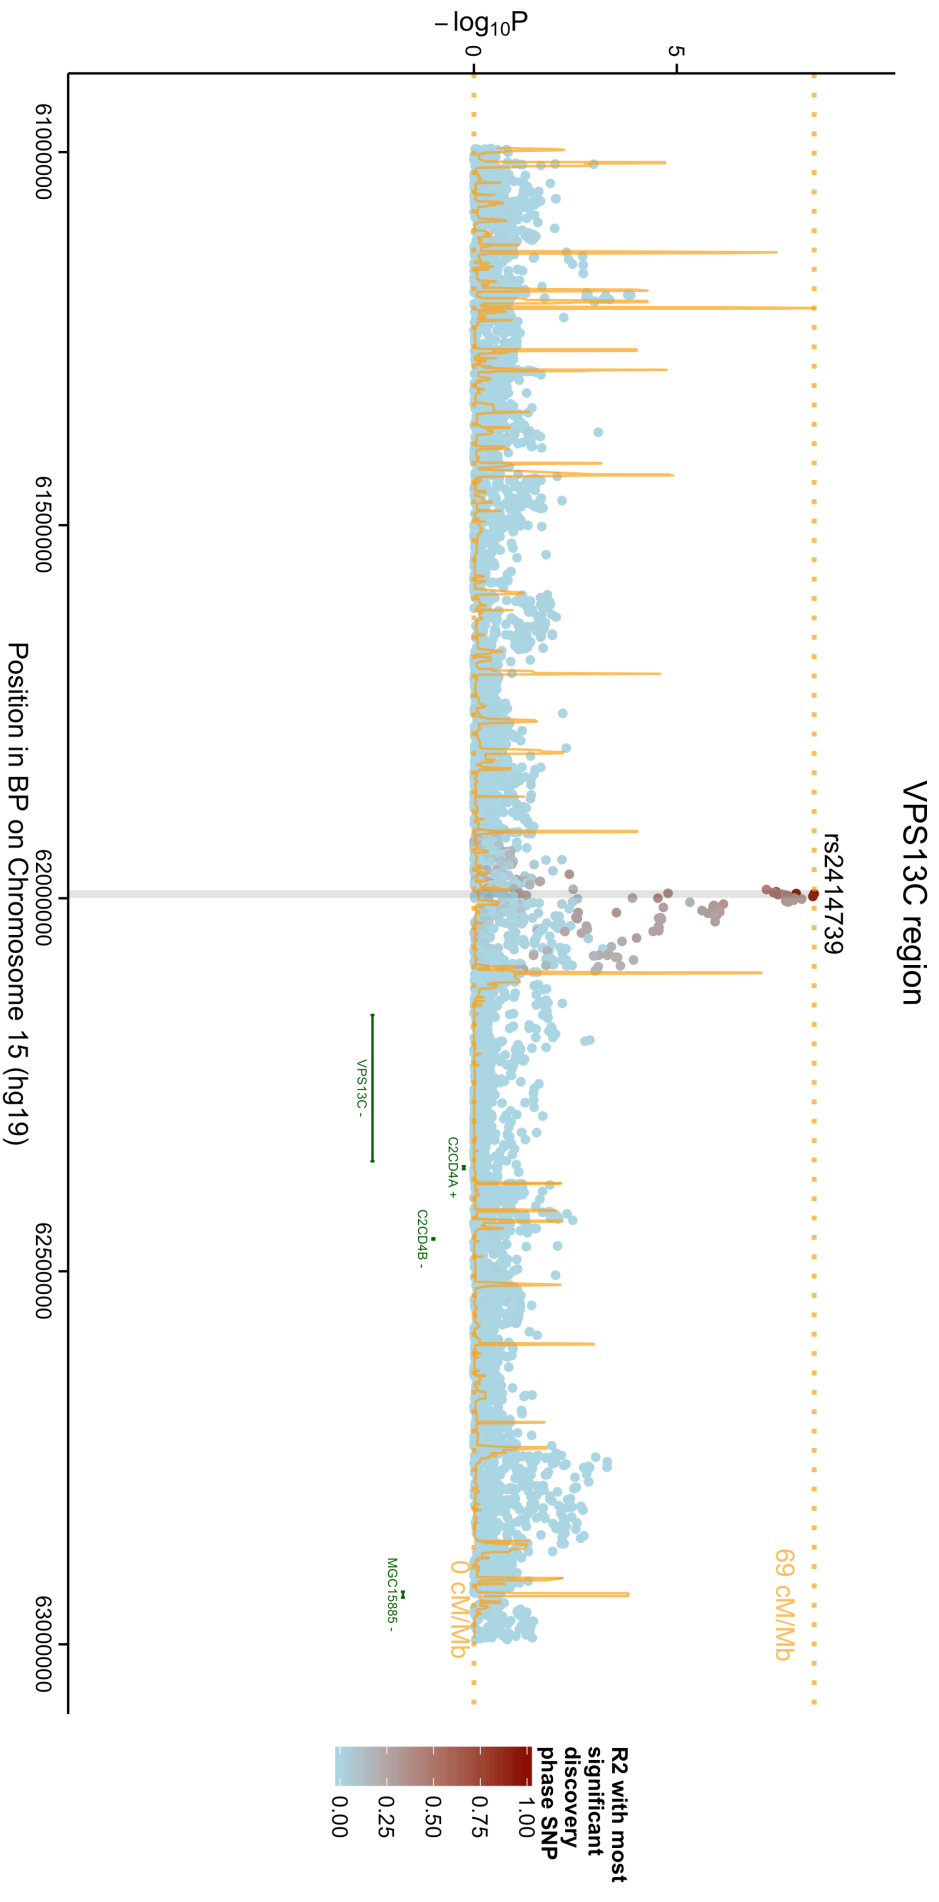

## BCKDK/ STX1B region

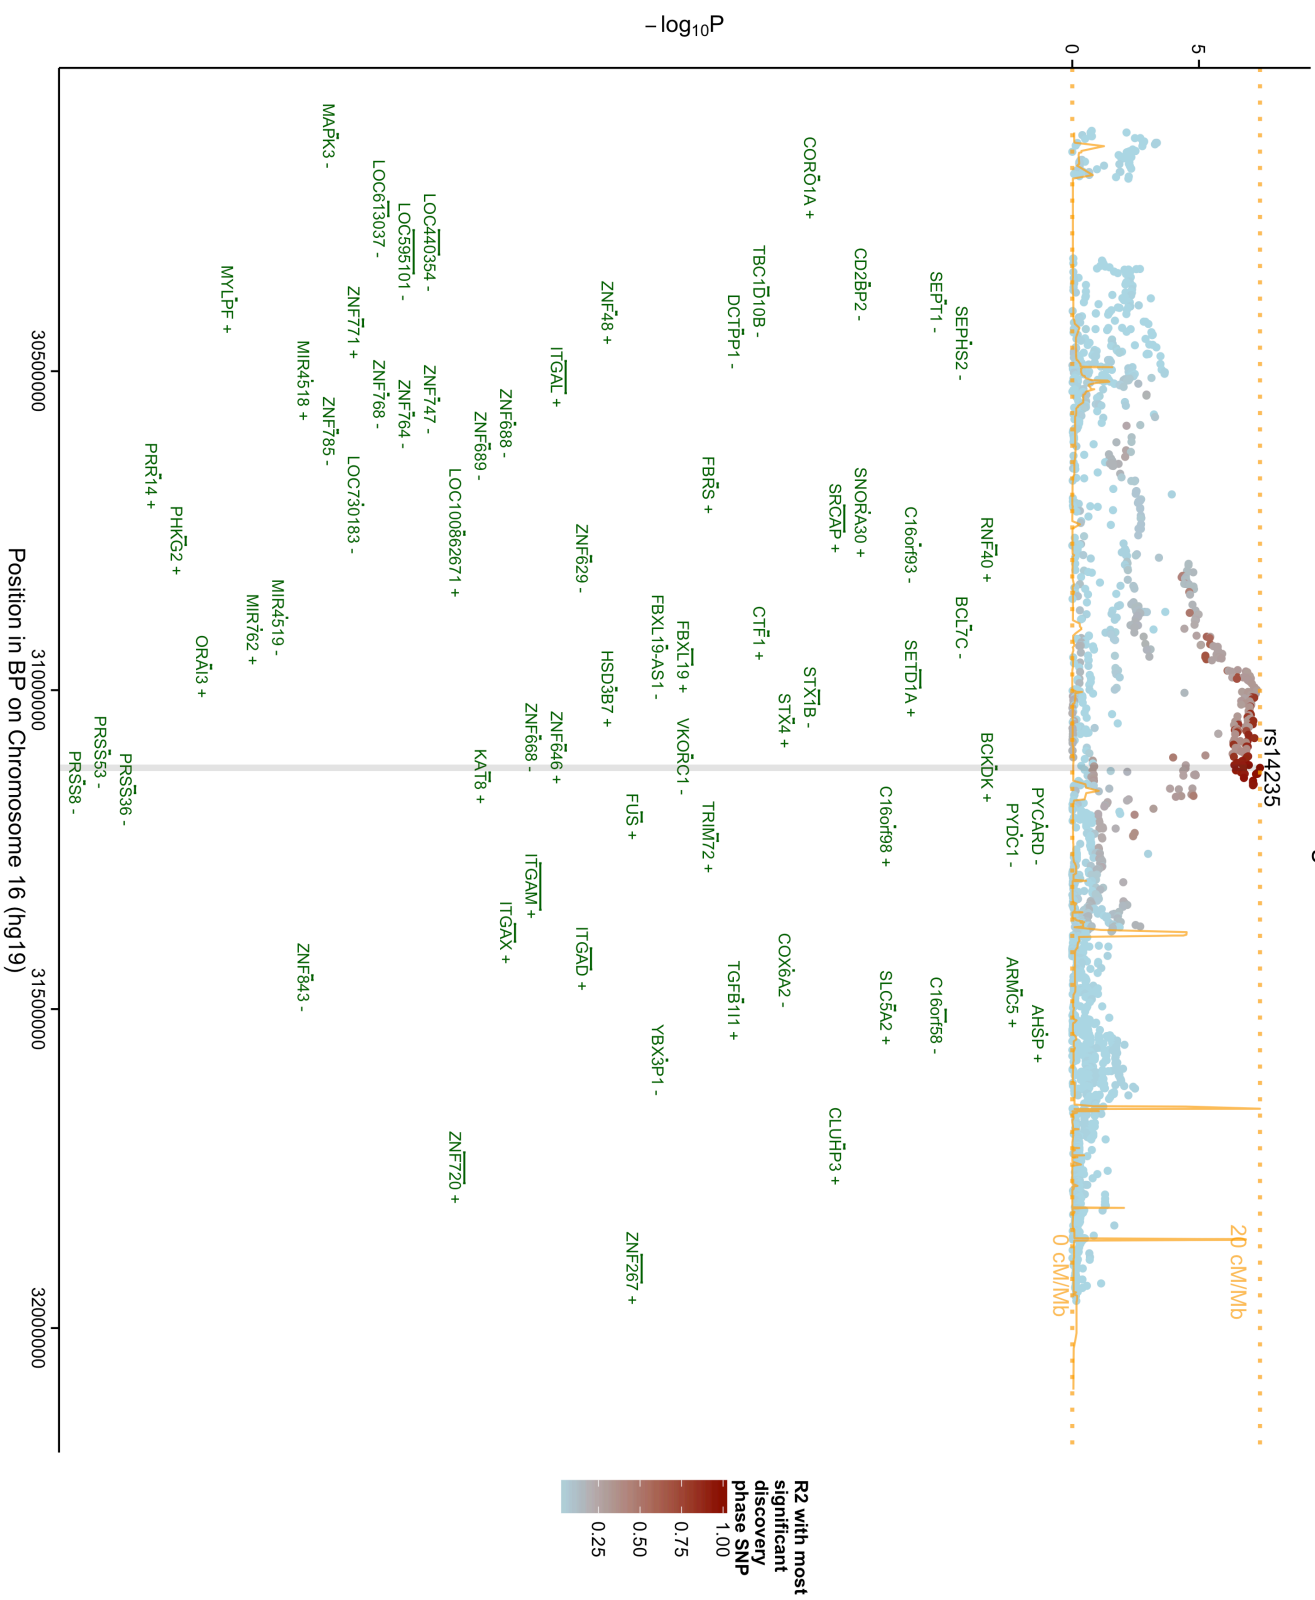

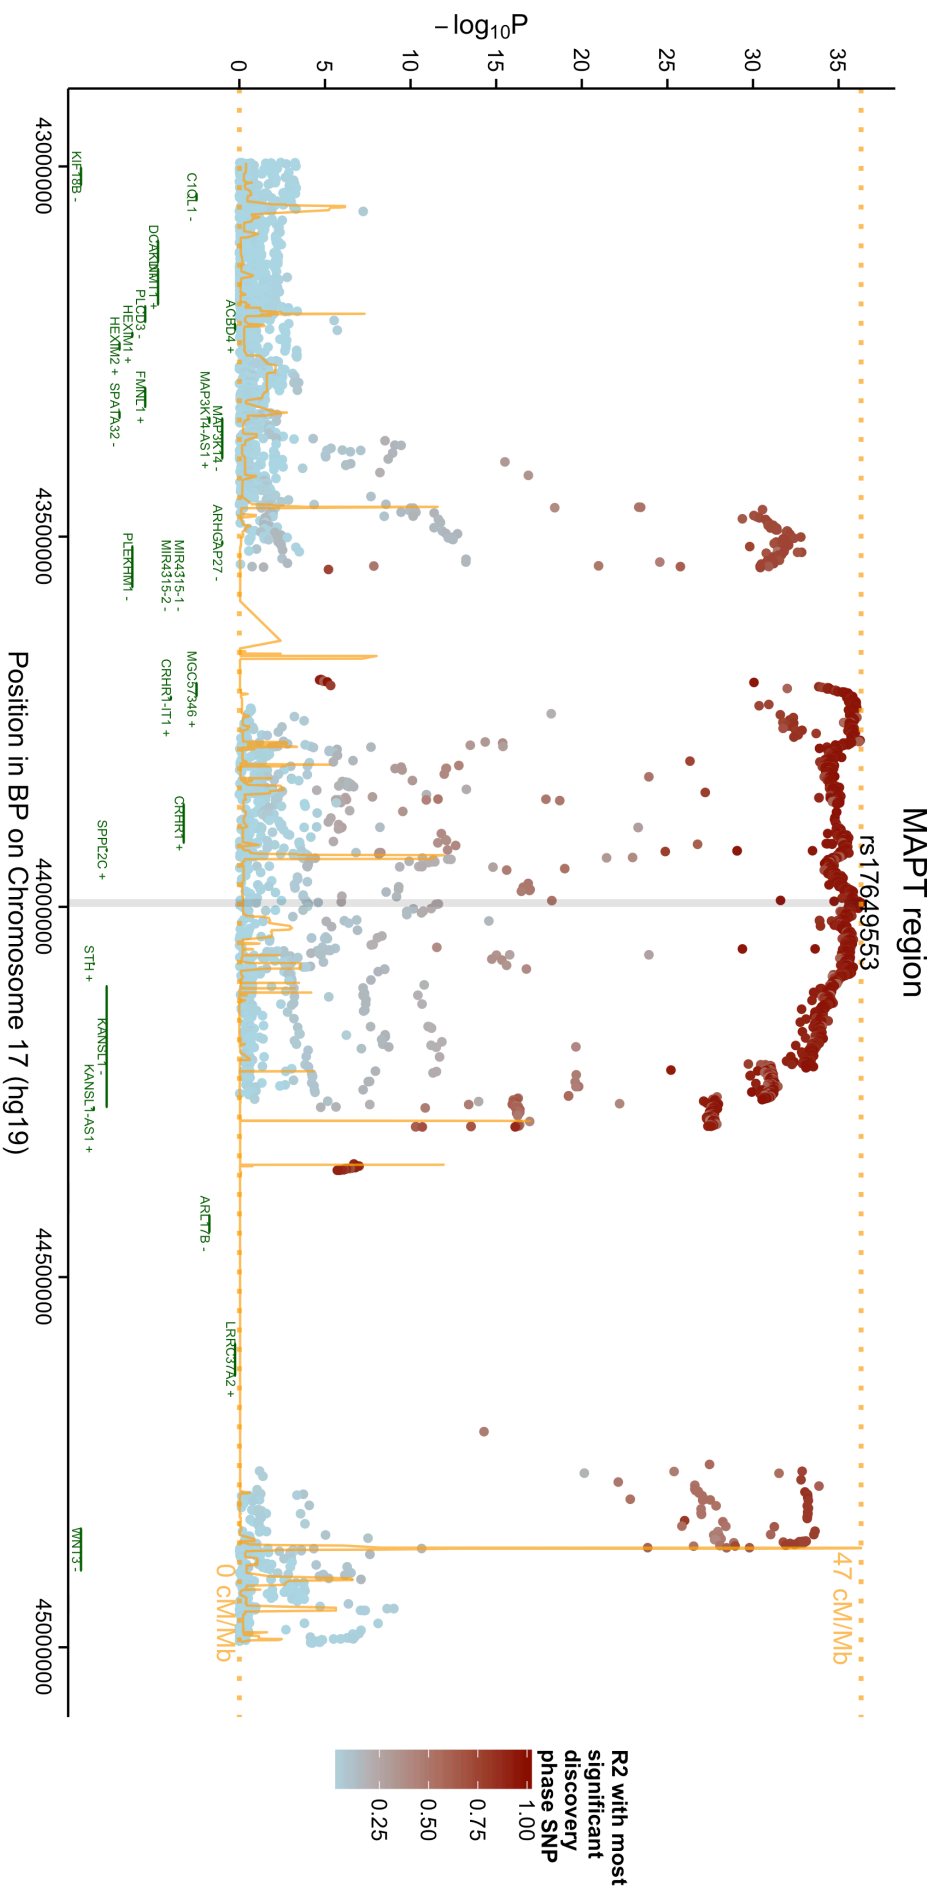

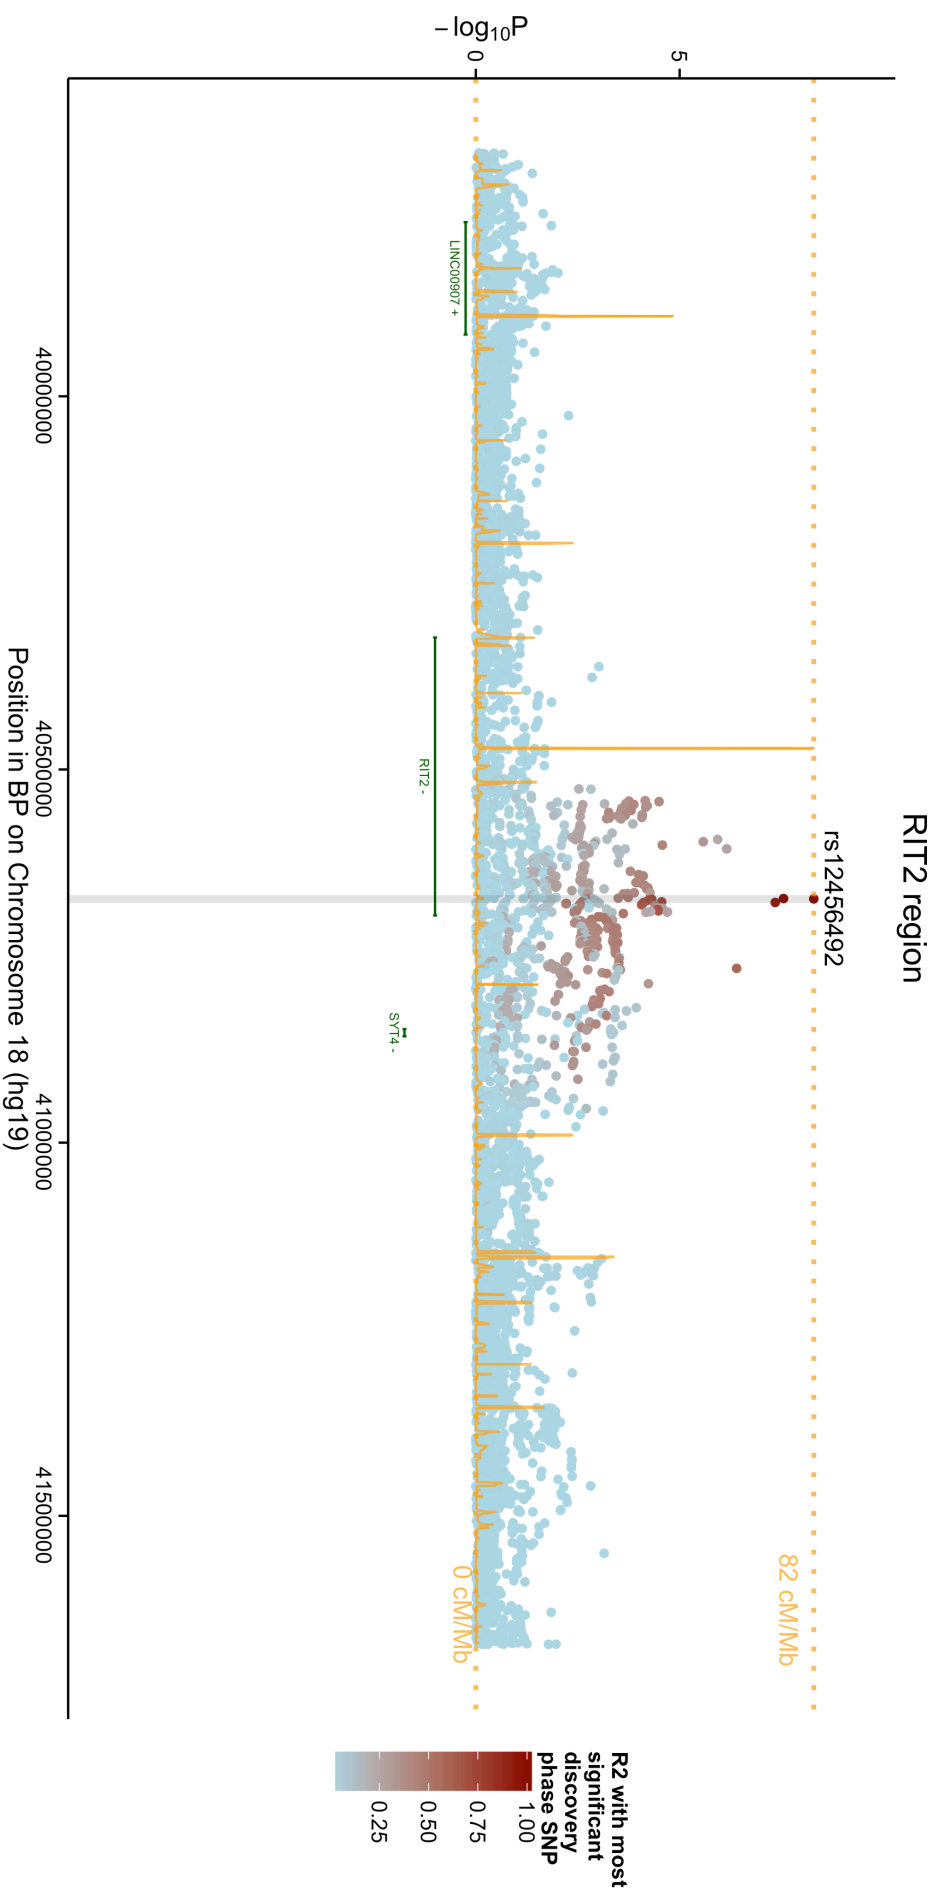

**R2 with most significant discover phase SNP**

1.00

0.75

0.50

0.25

### SPPL2B region

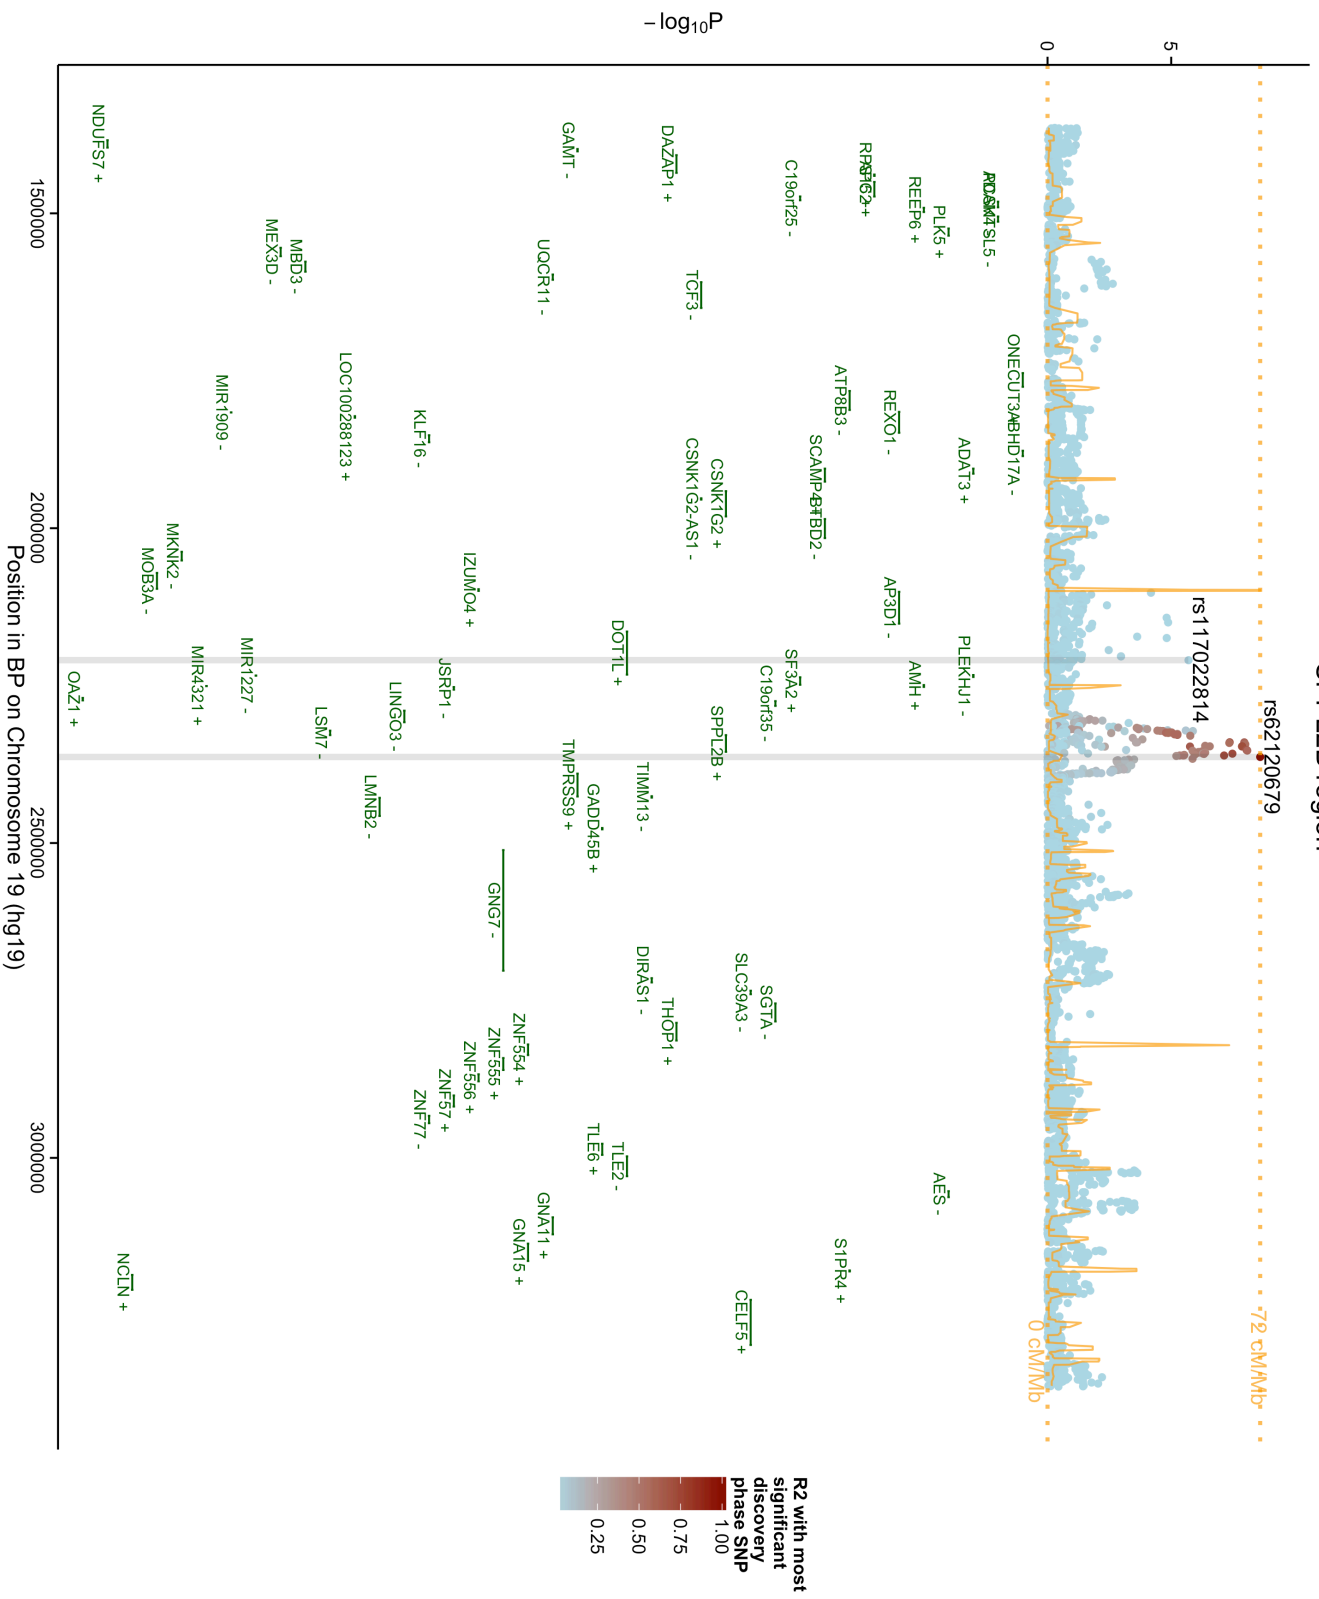



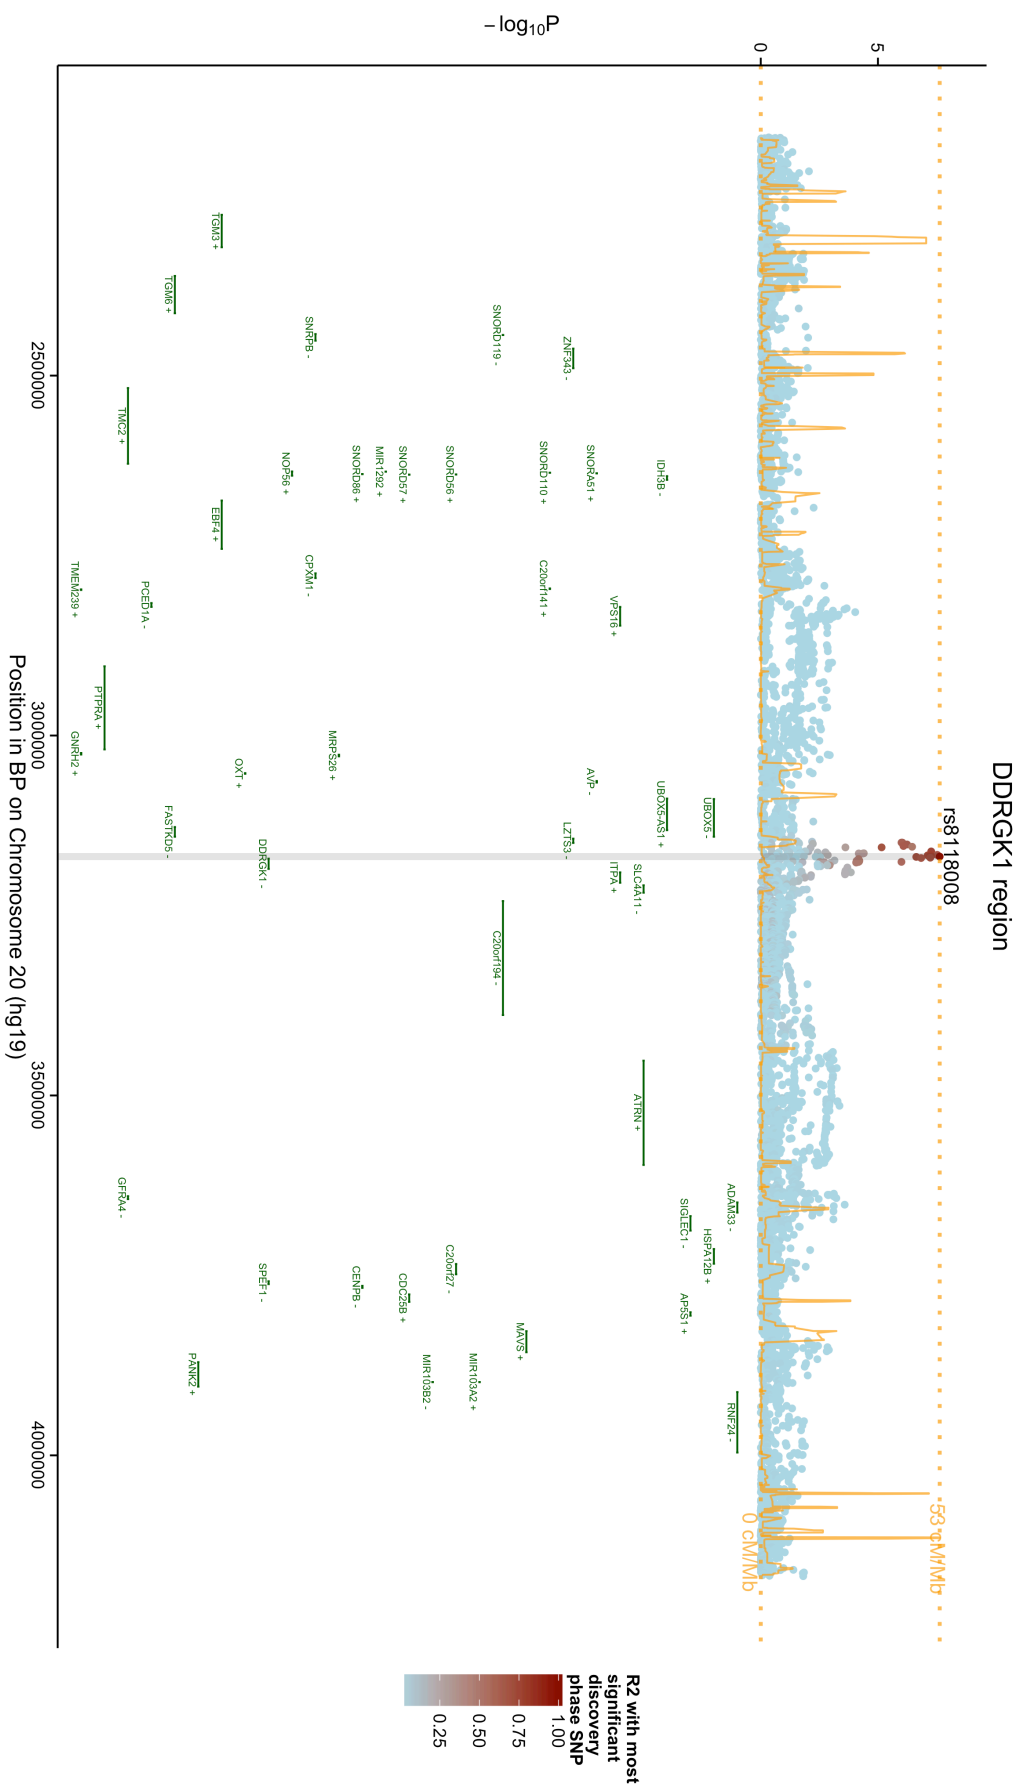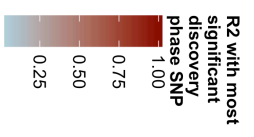

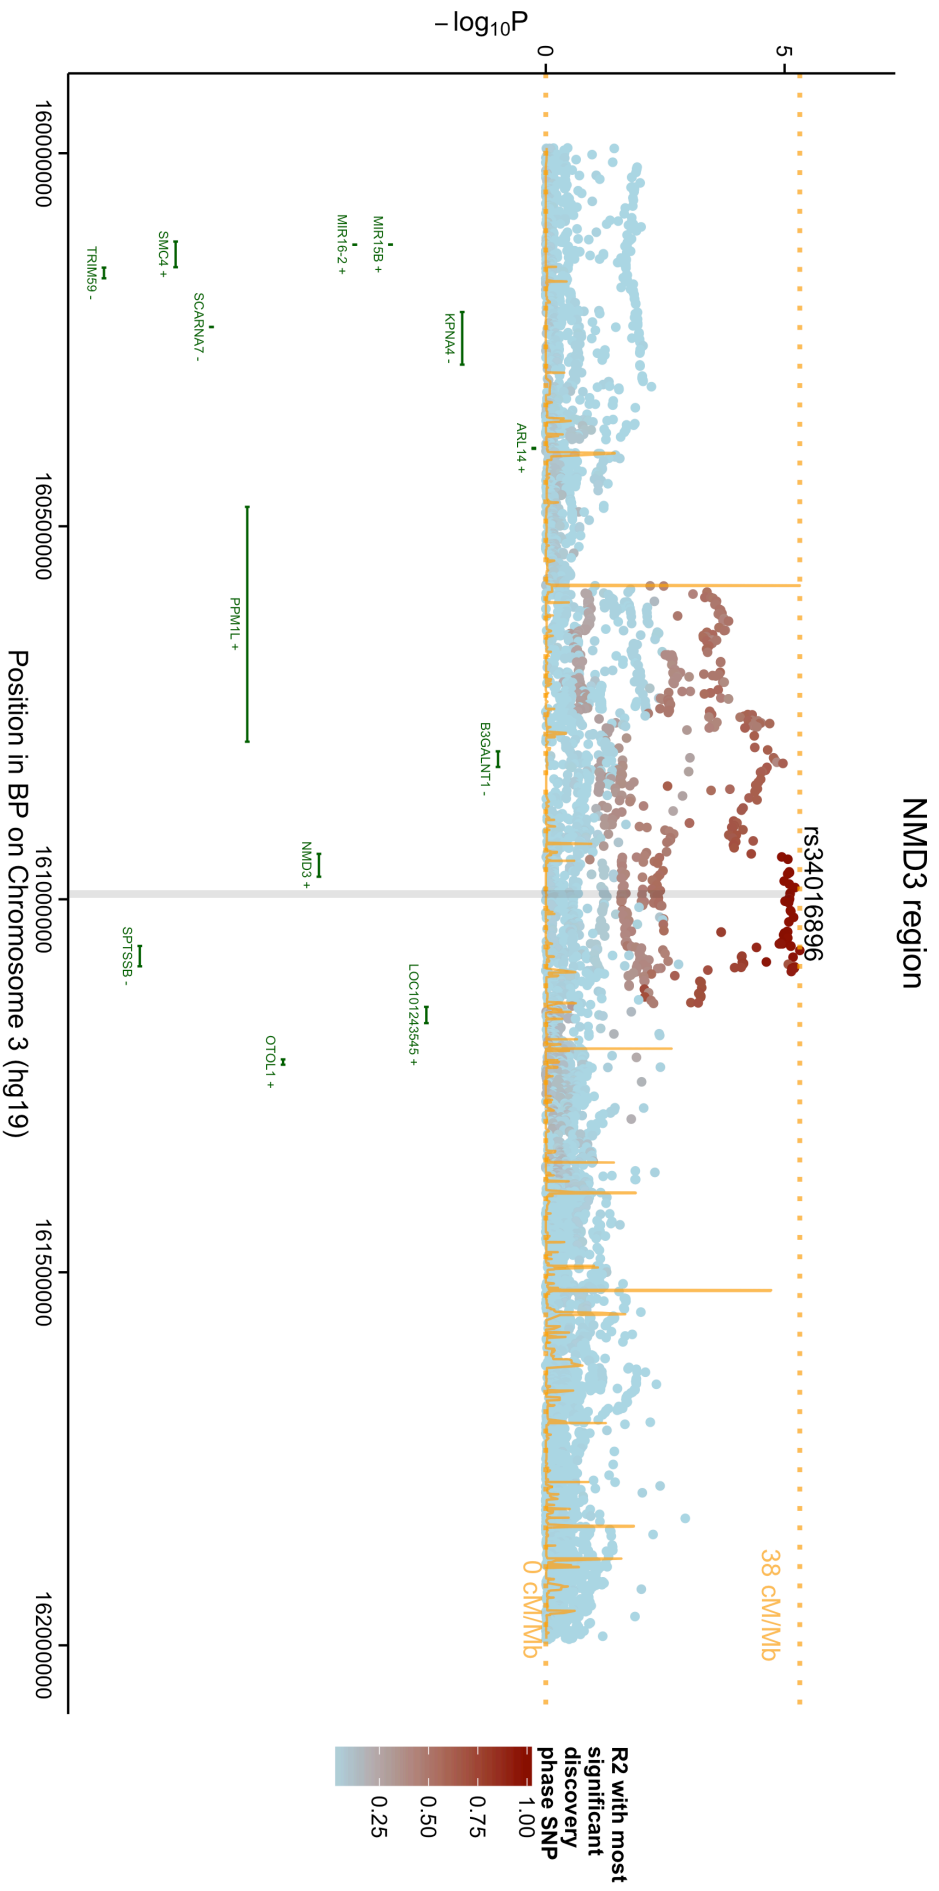

# FGF20 region

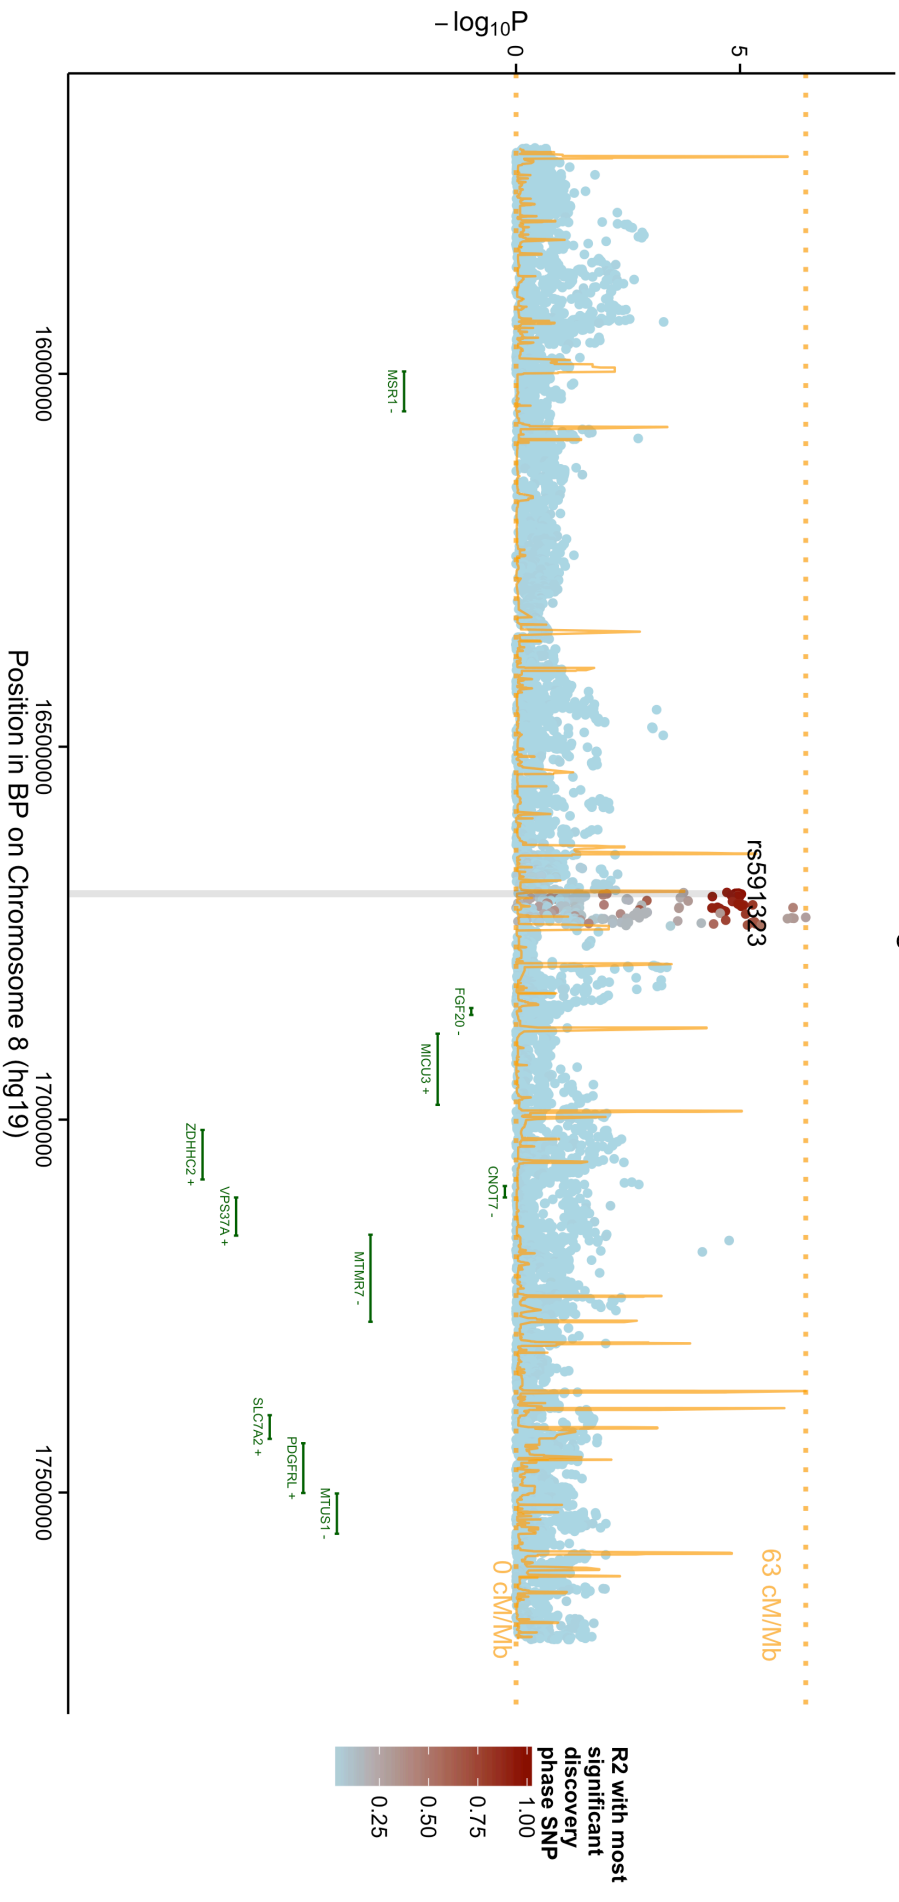

R2 with most significant discover phase SNP

1.00  
0.75  
0.50  
0.25

# MMP16 region

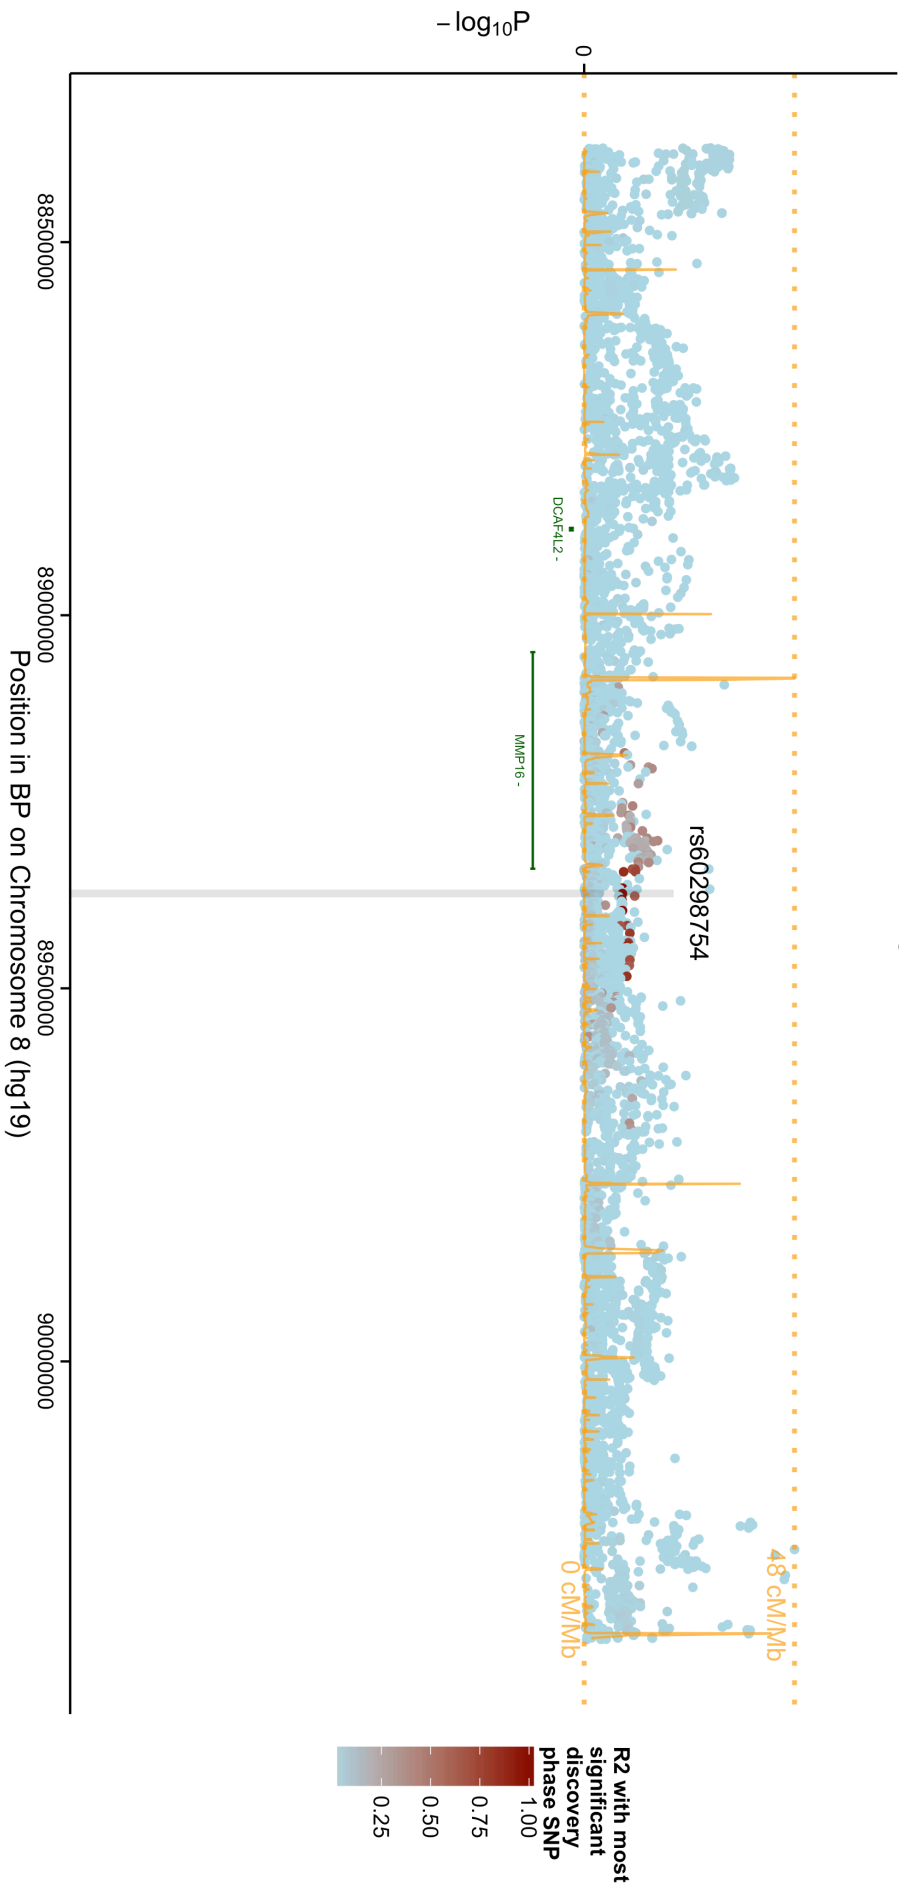

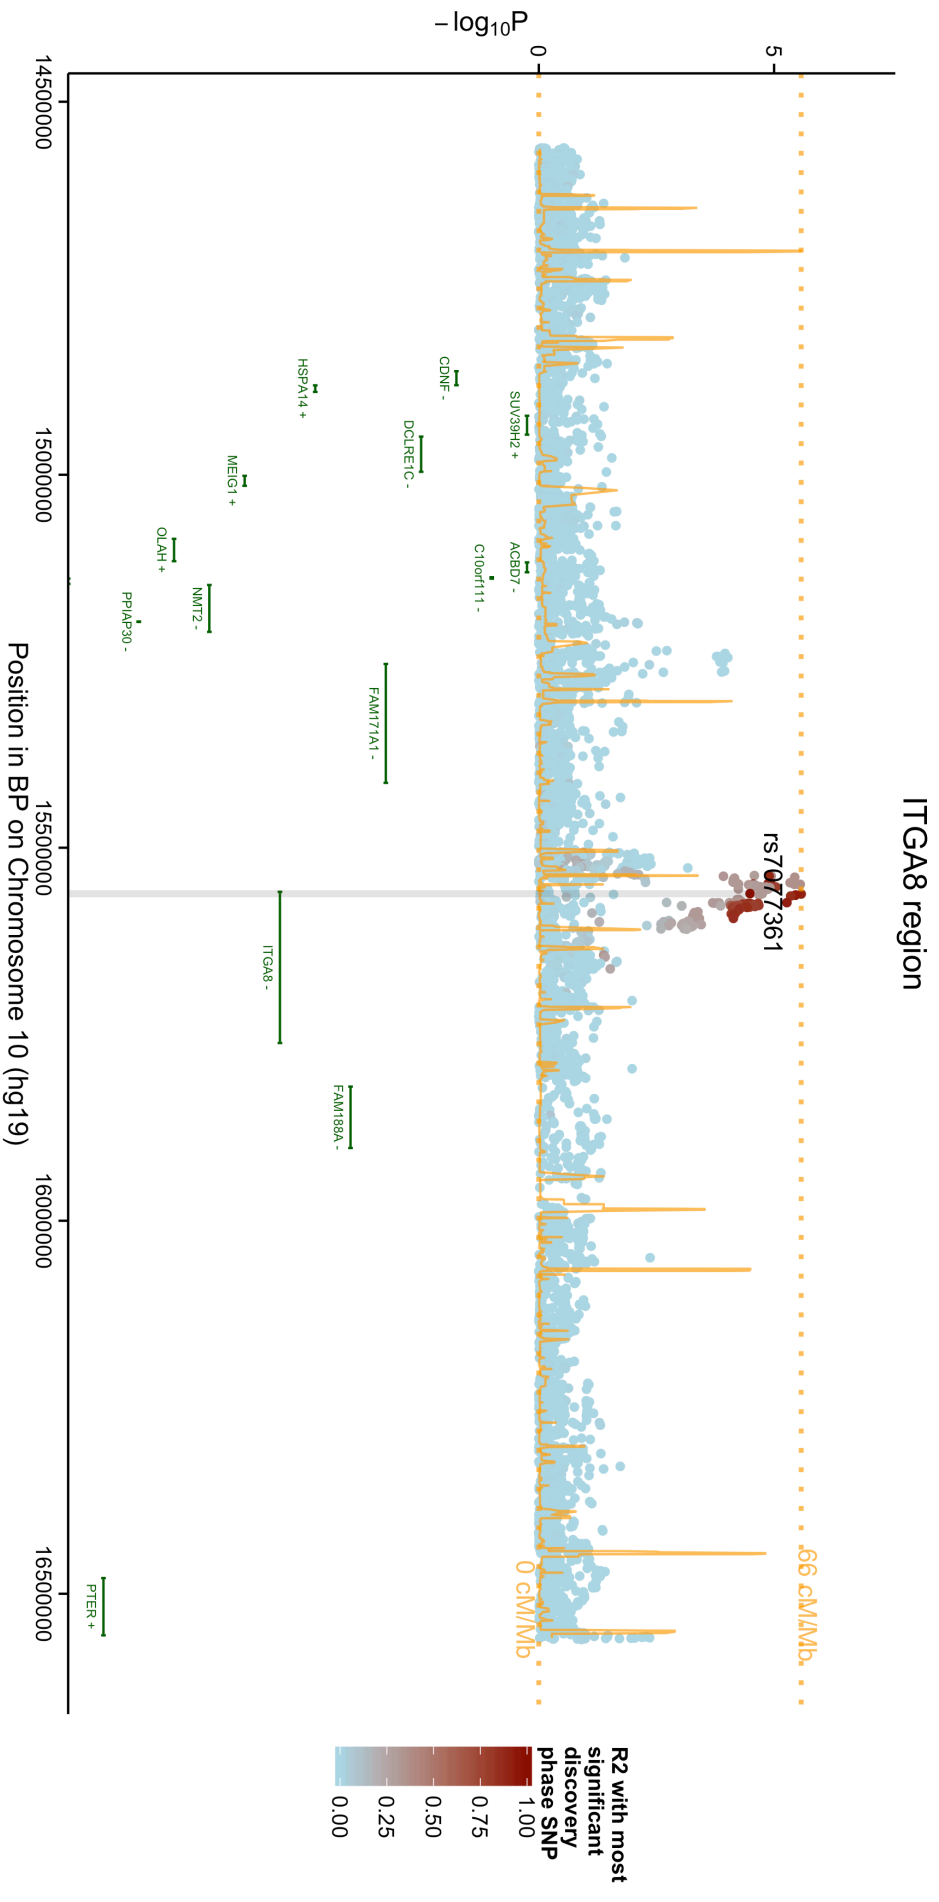

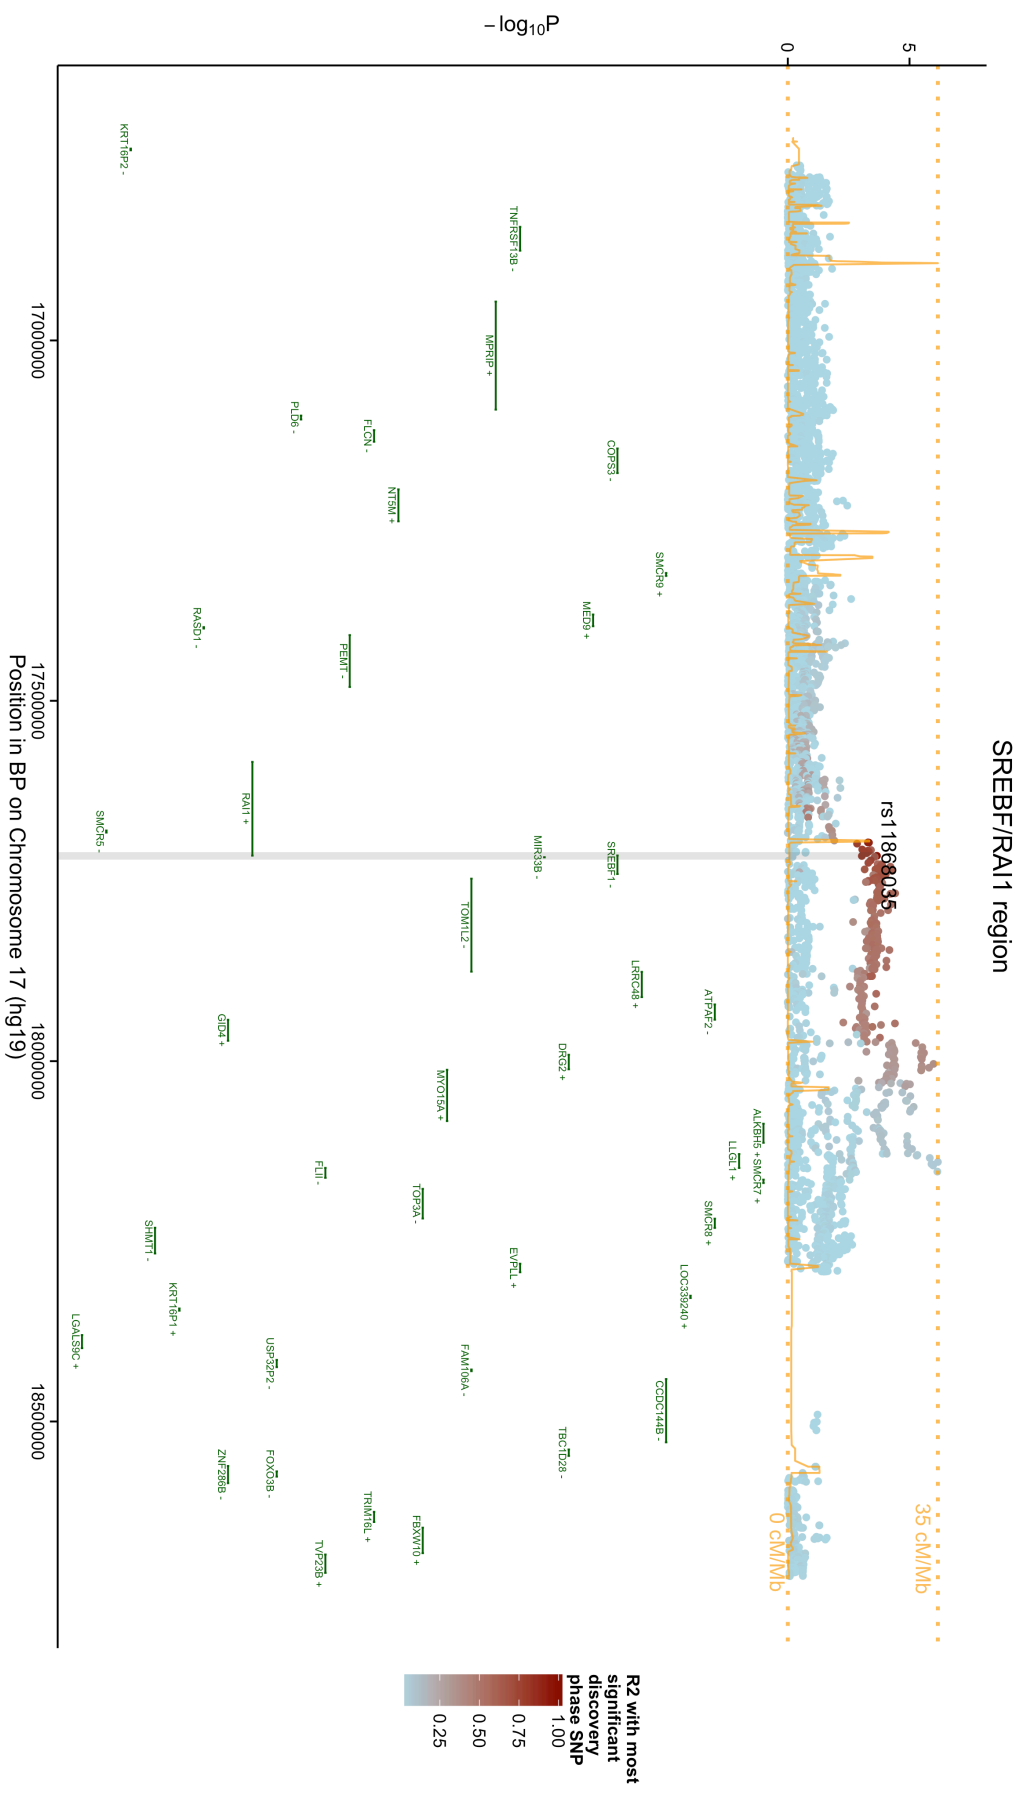

# USP25 region

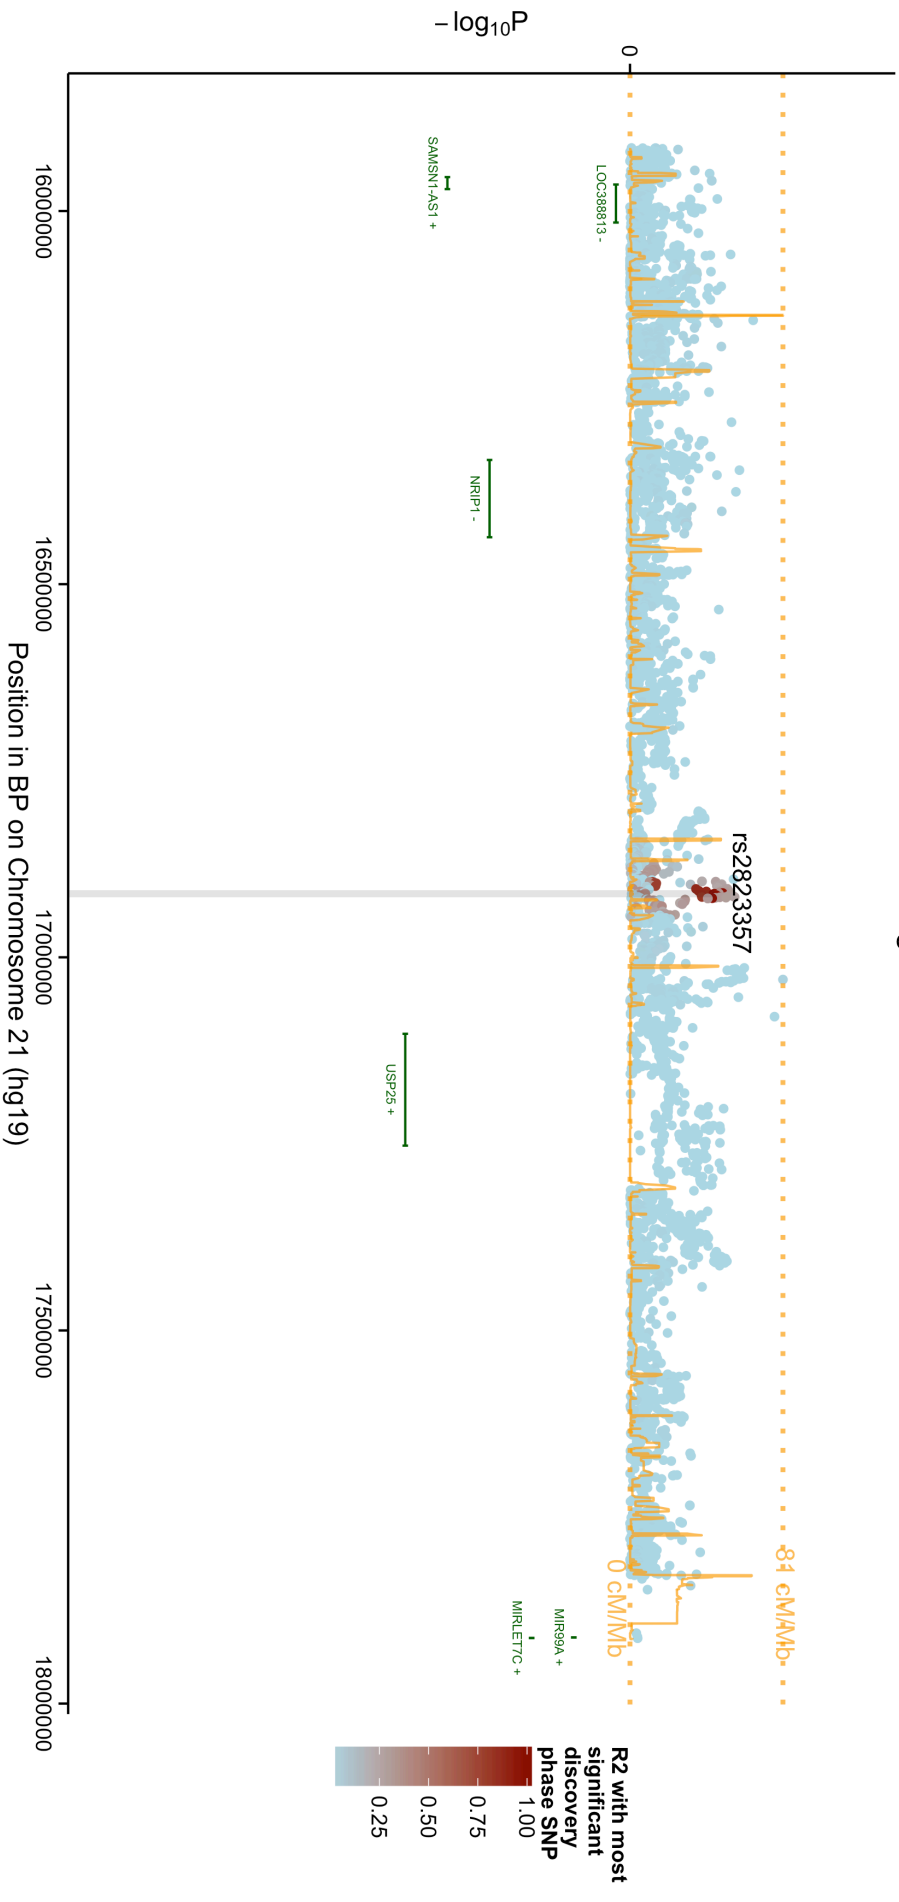

Supplementary Figure 2 (page 56 - 95): Forest plots. 40 Forest plots of SNPs from discovery and conditional phases described in Tables 1 and 2. Nearest gene or previously published proximal gene names included in table.

### rs35749011 GBA/SYT11 Discovery SNP

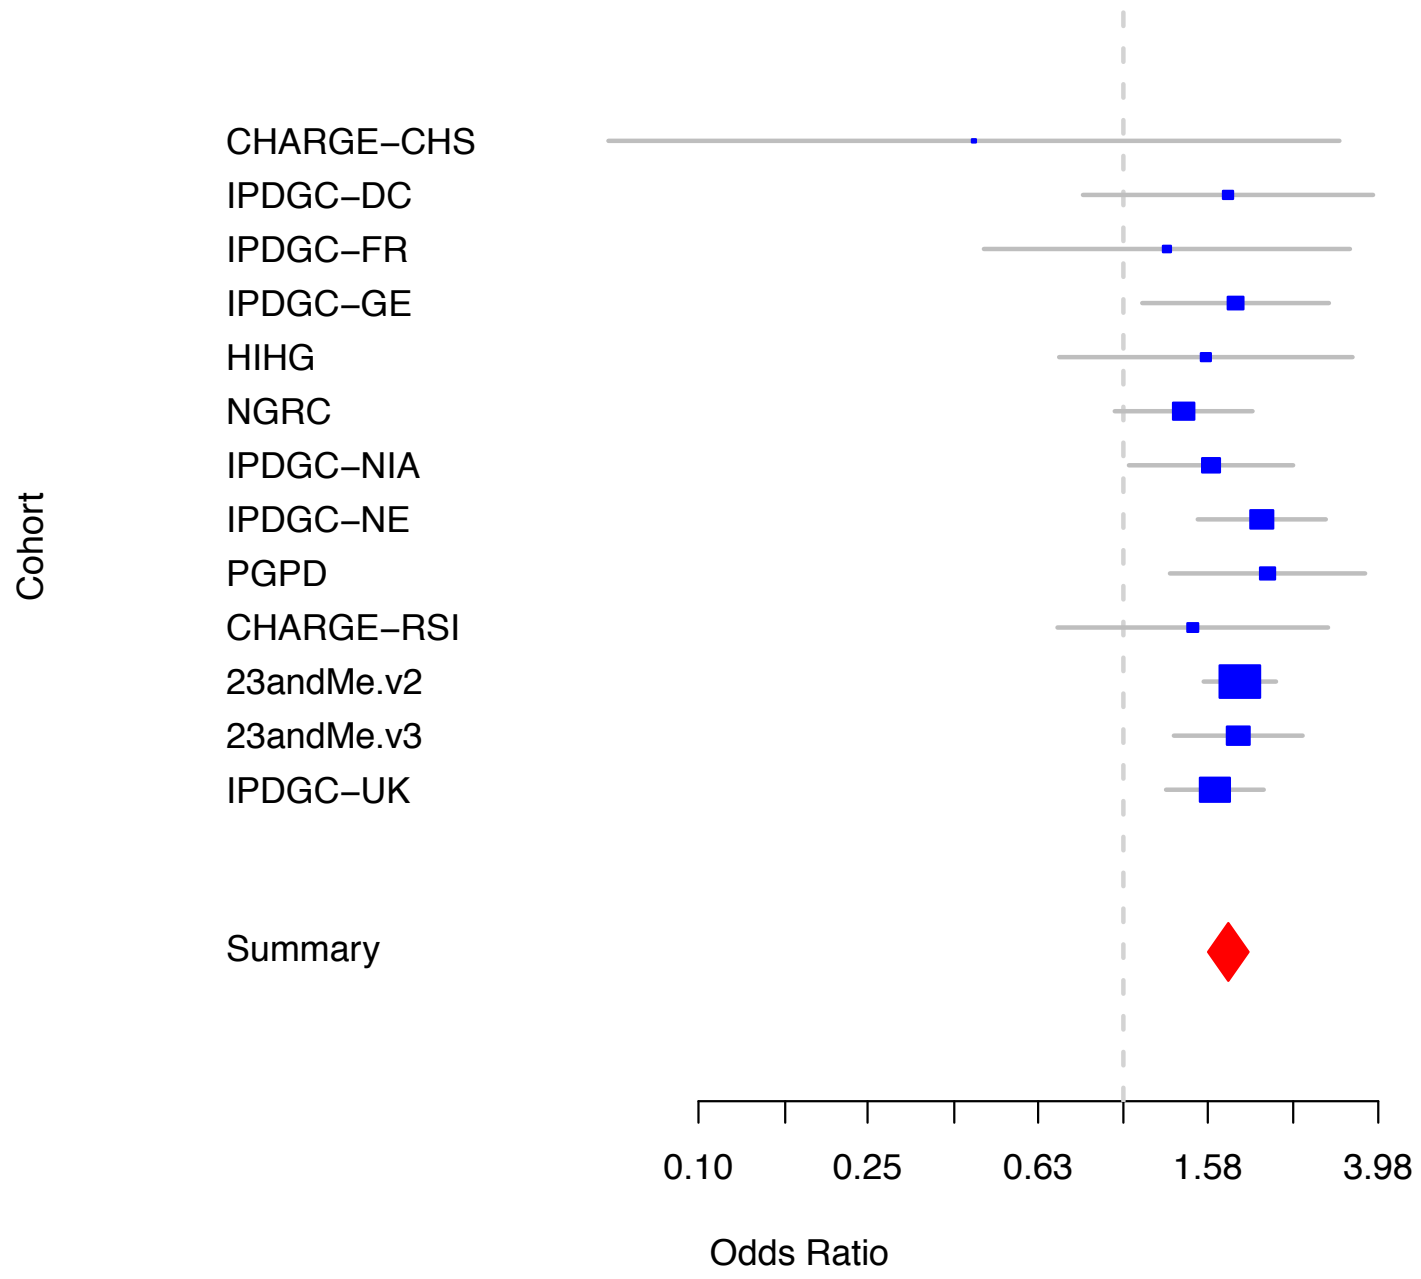



## rs823118 RAB7L1/NUCKS1 Discovery SNP

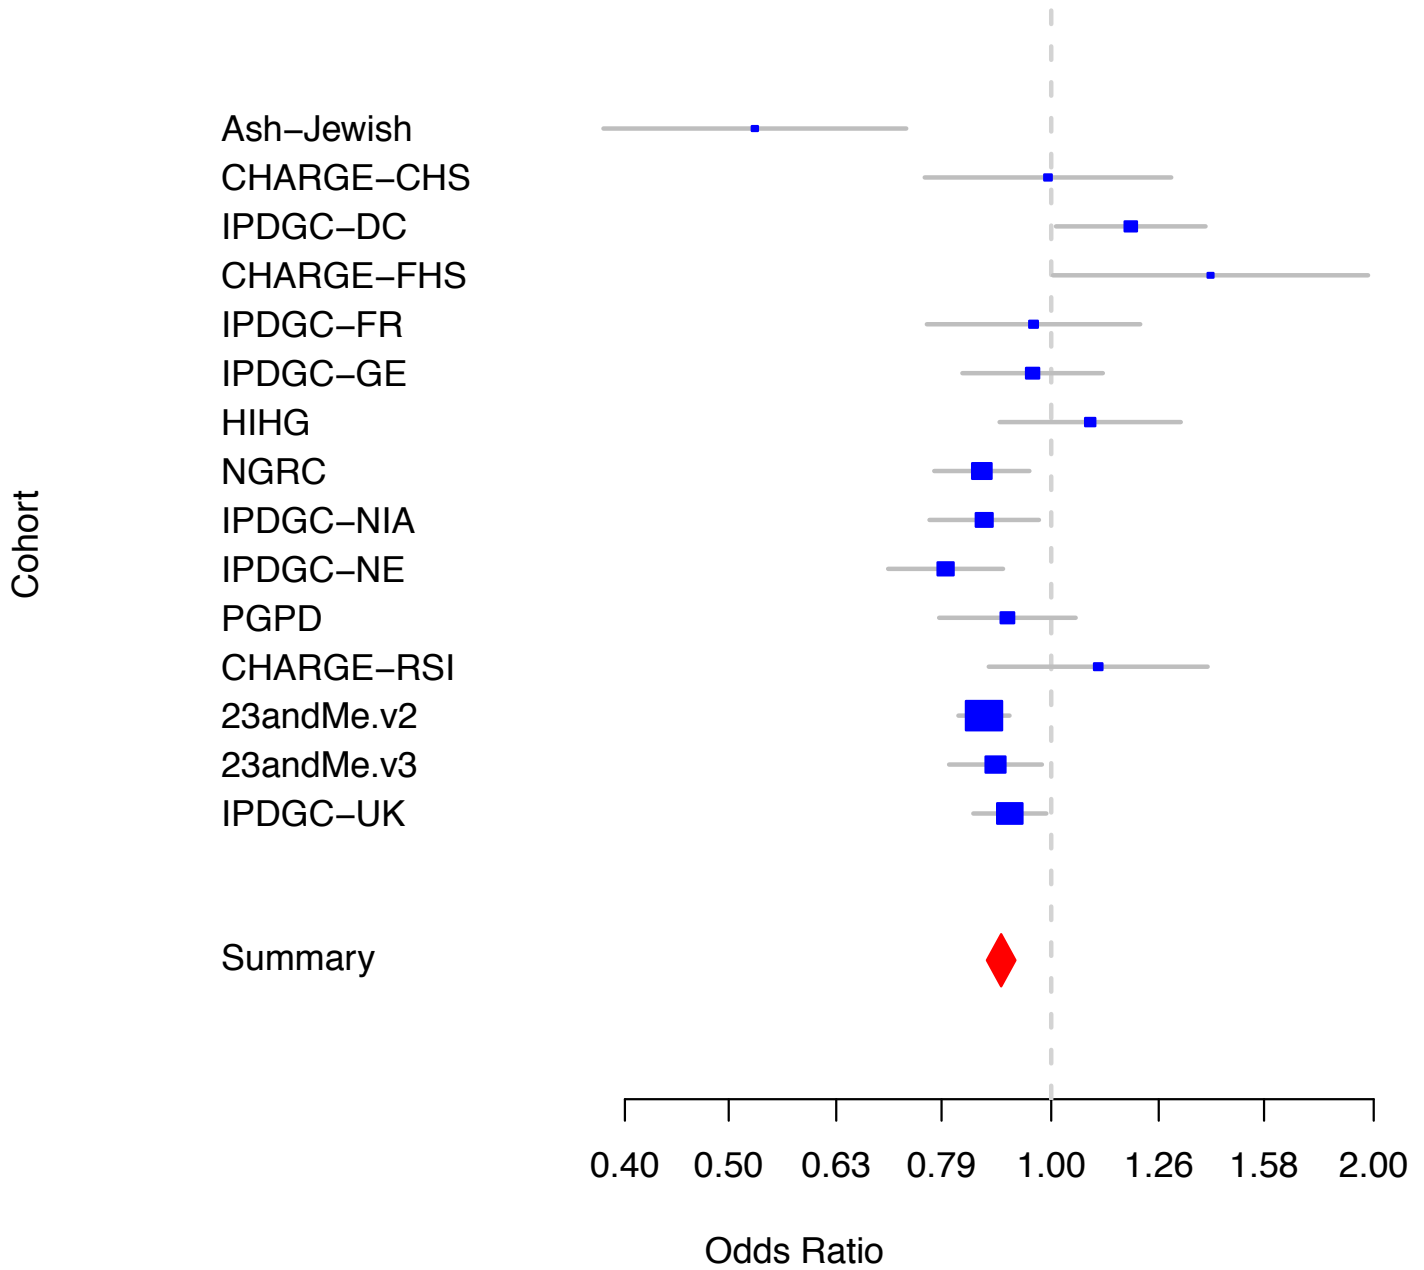

# rs10797576 SIPA1L2 Discovery SNP

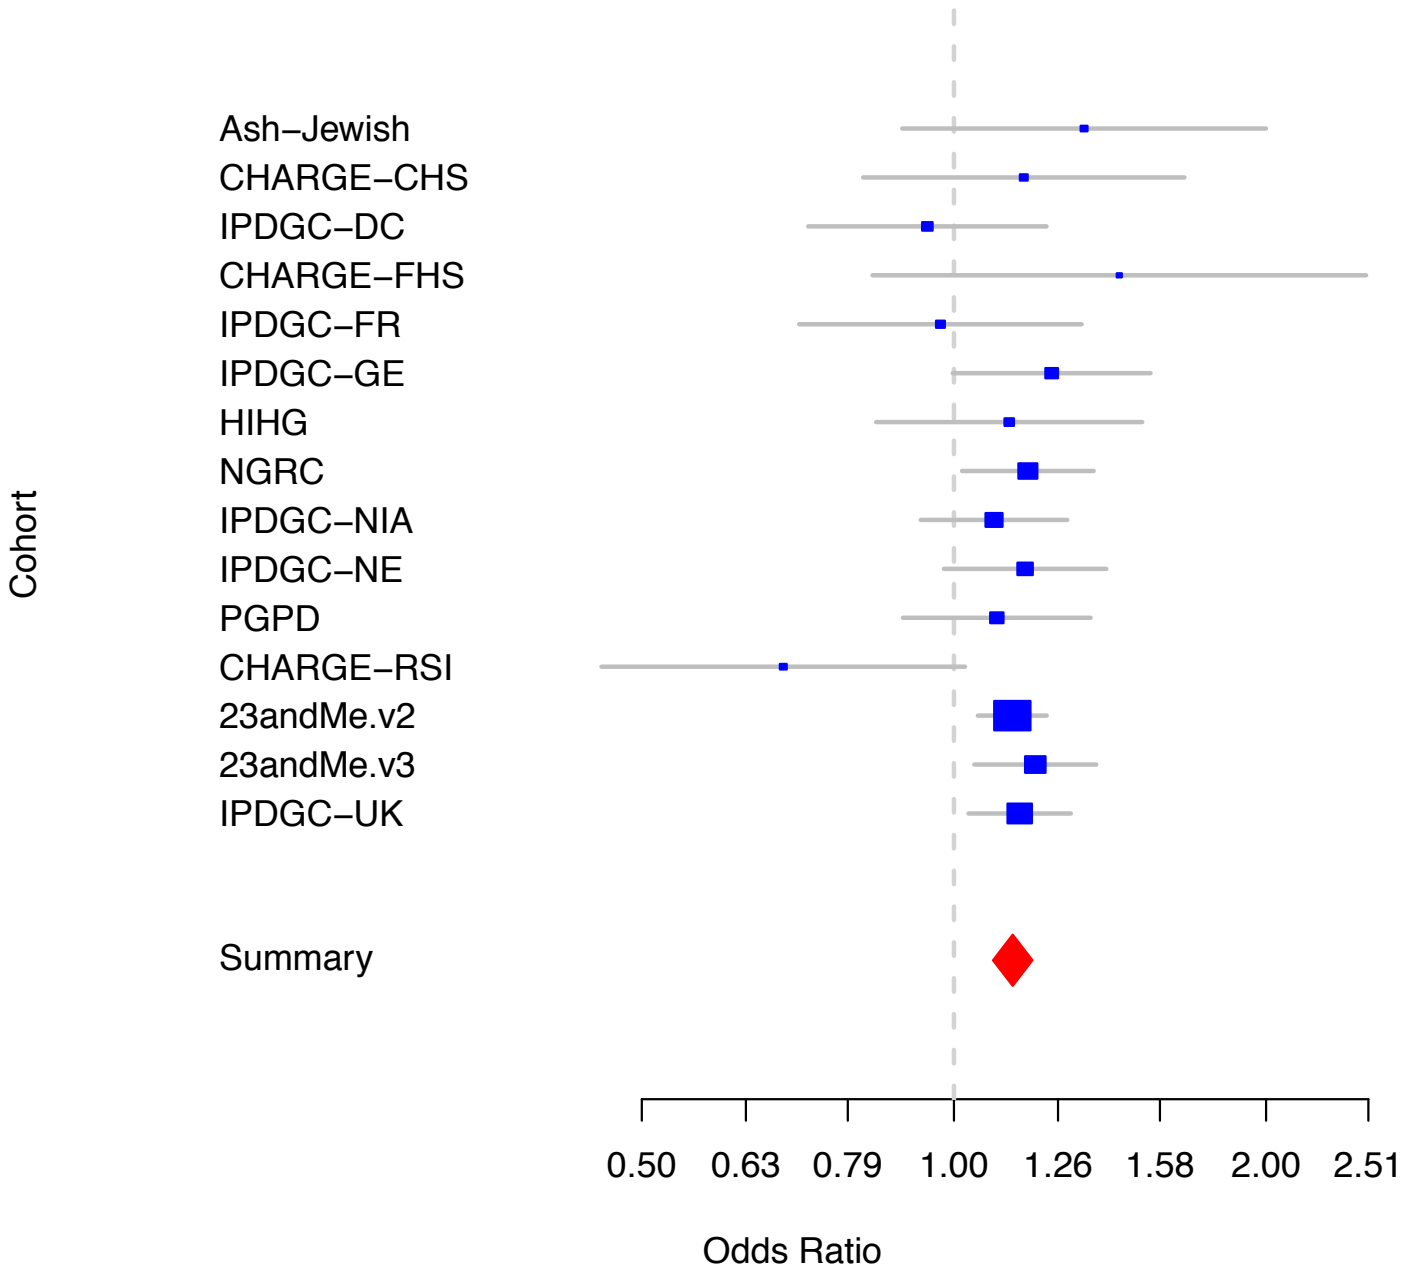

# rs6430538 ACMSD/TMEM163 Discovery SNP

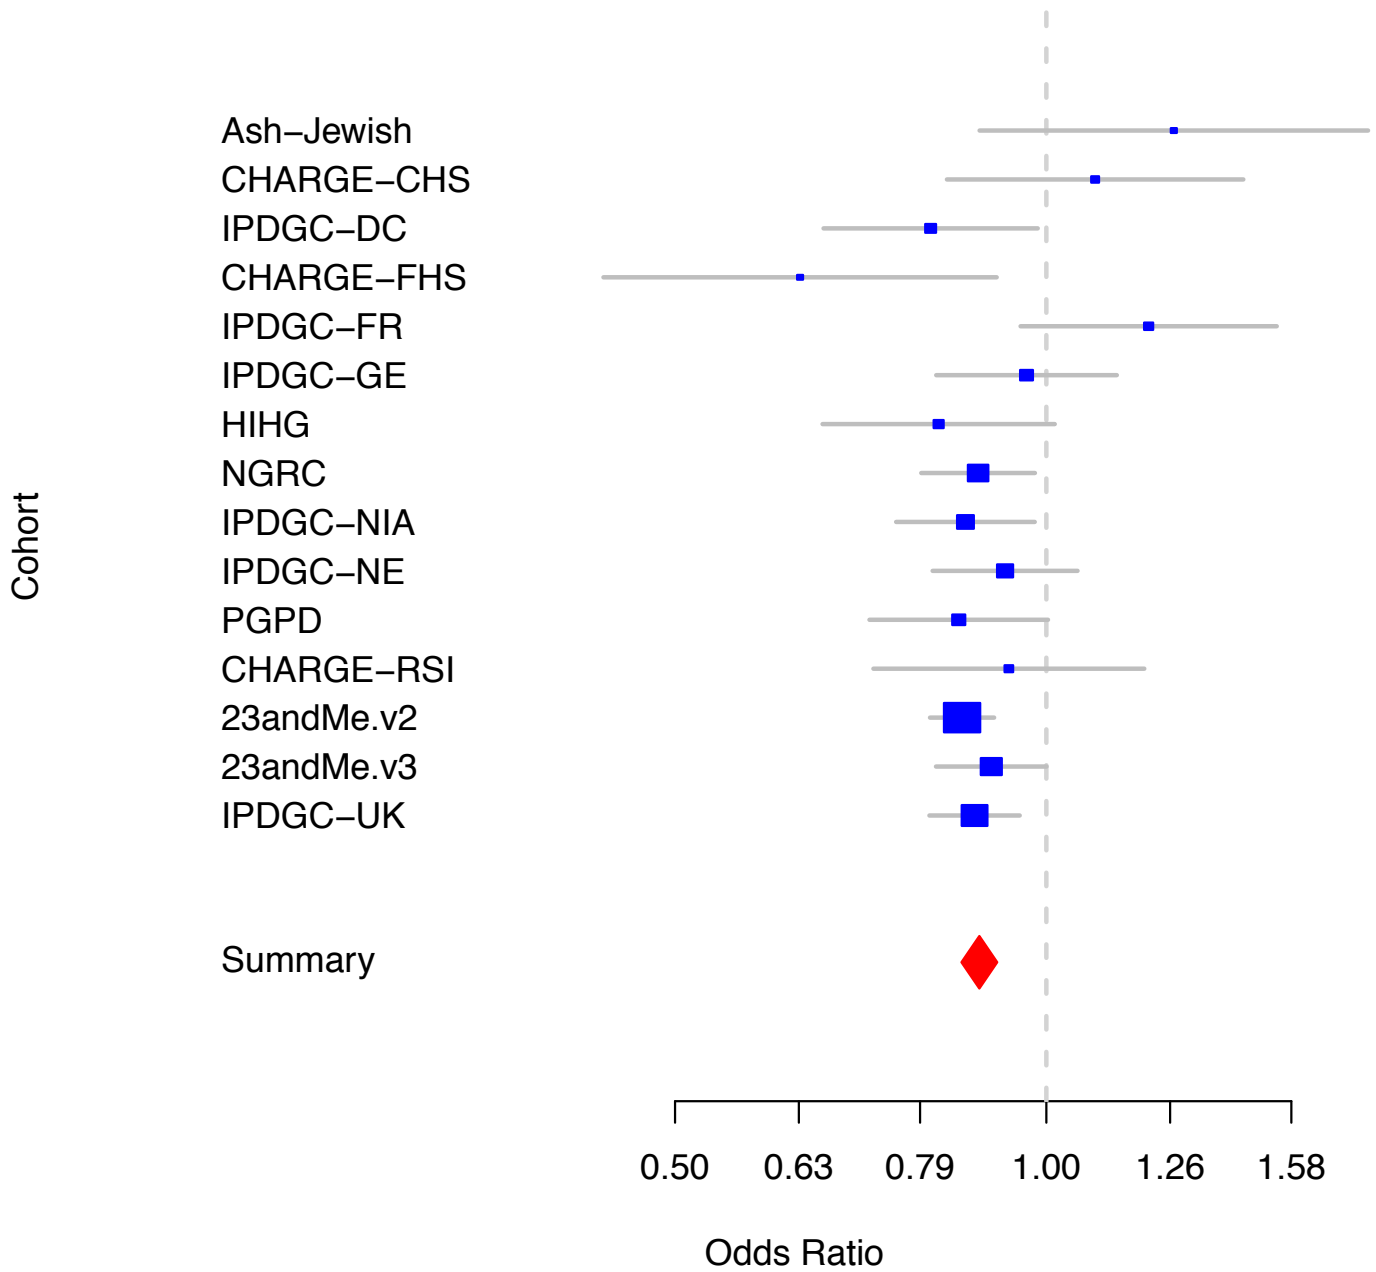

# rs1474055 STK39 Discovery SNP

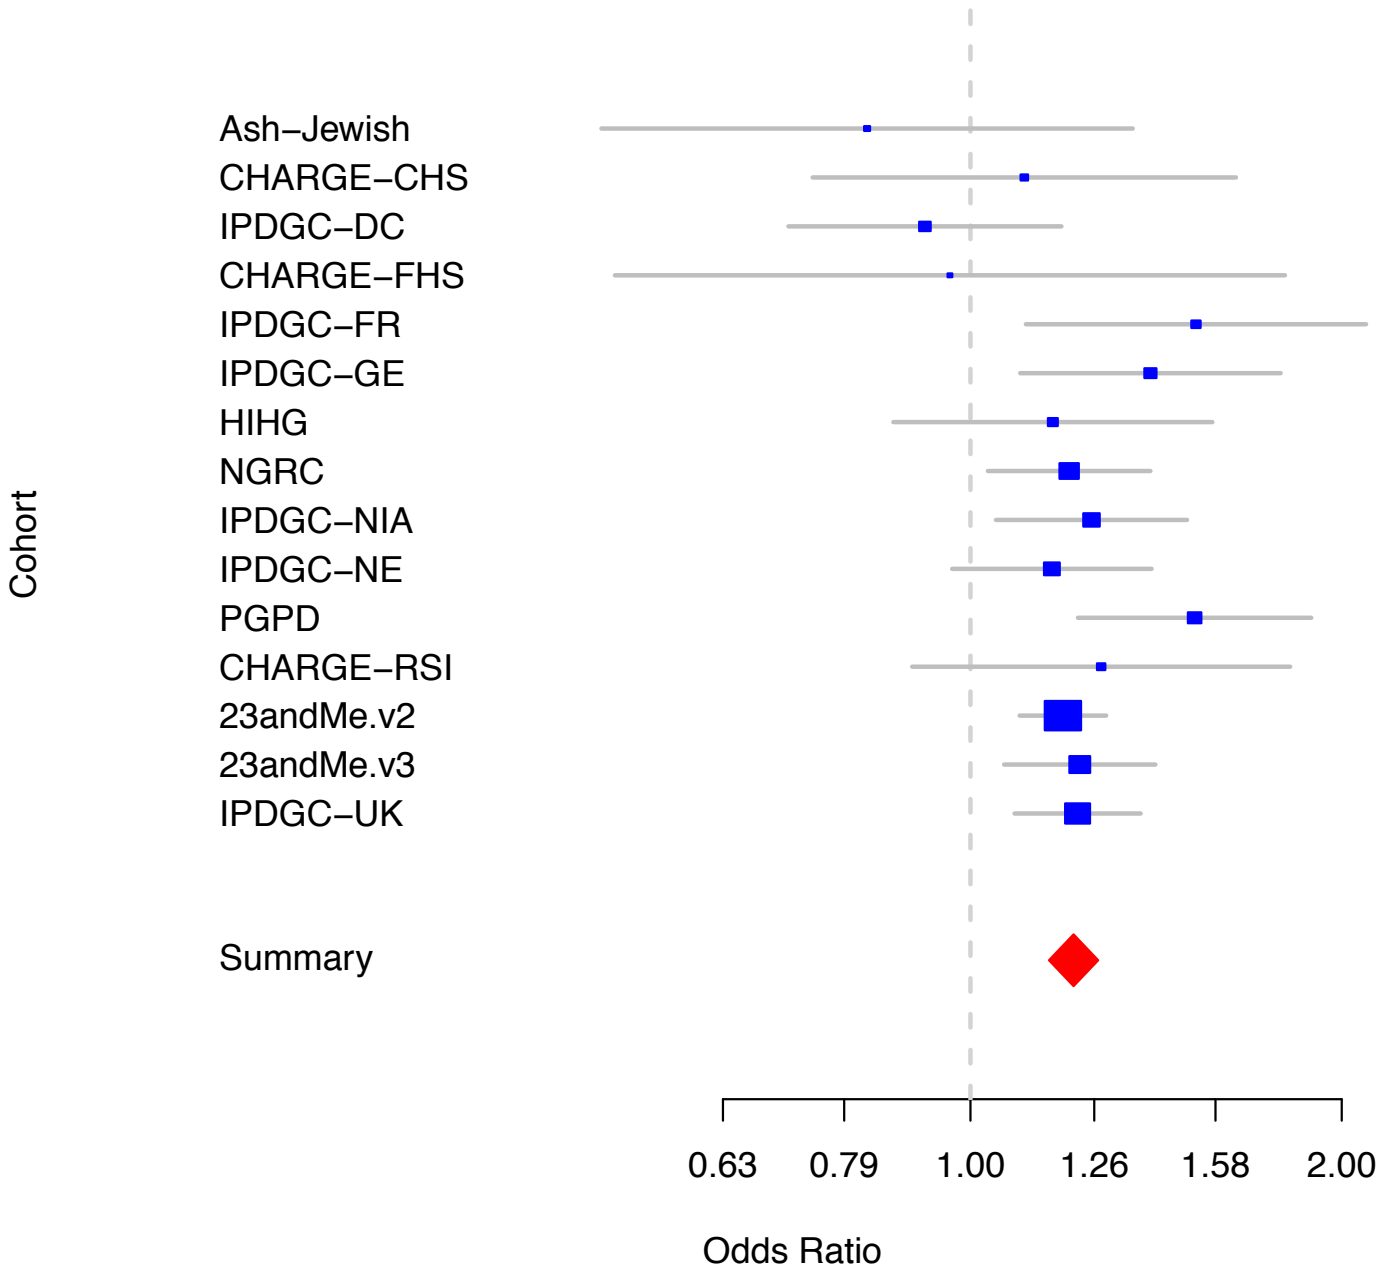

# rs115185635 KRT8P25/APOOP2 Discovery SNP

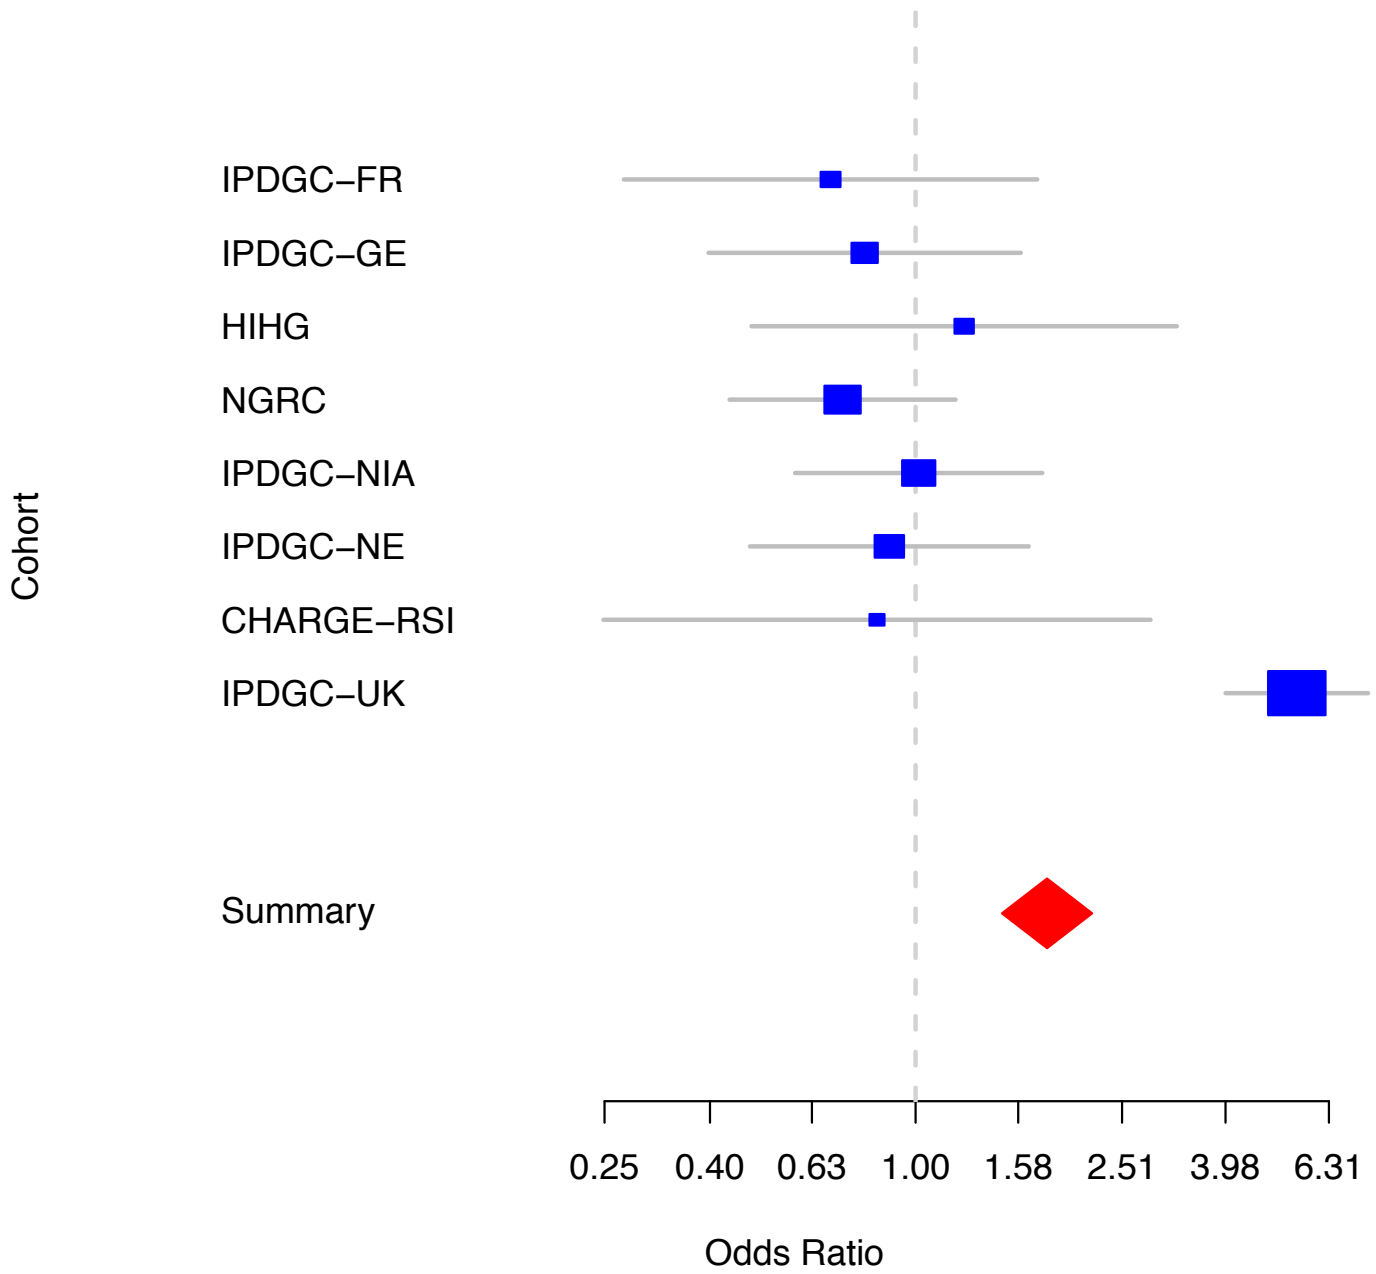

# rs12637471 MCCC1 Discovery SNP

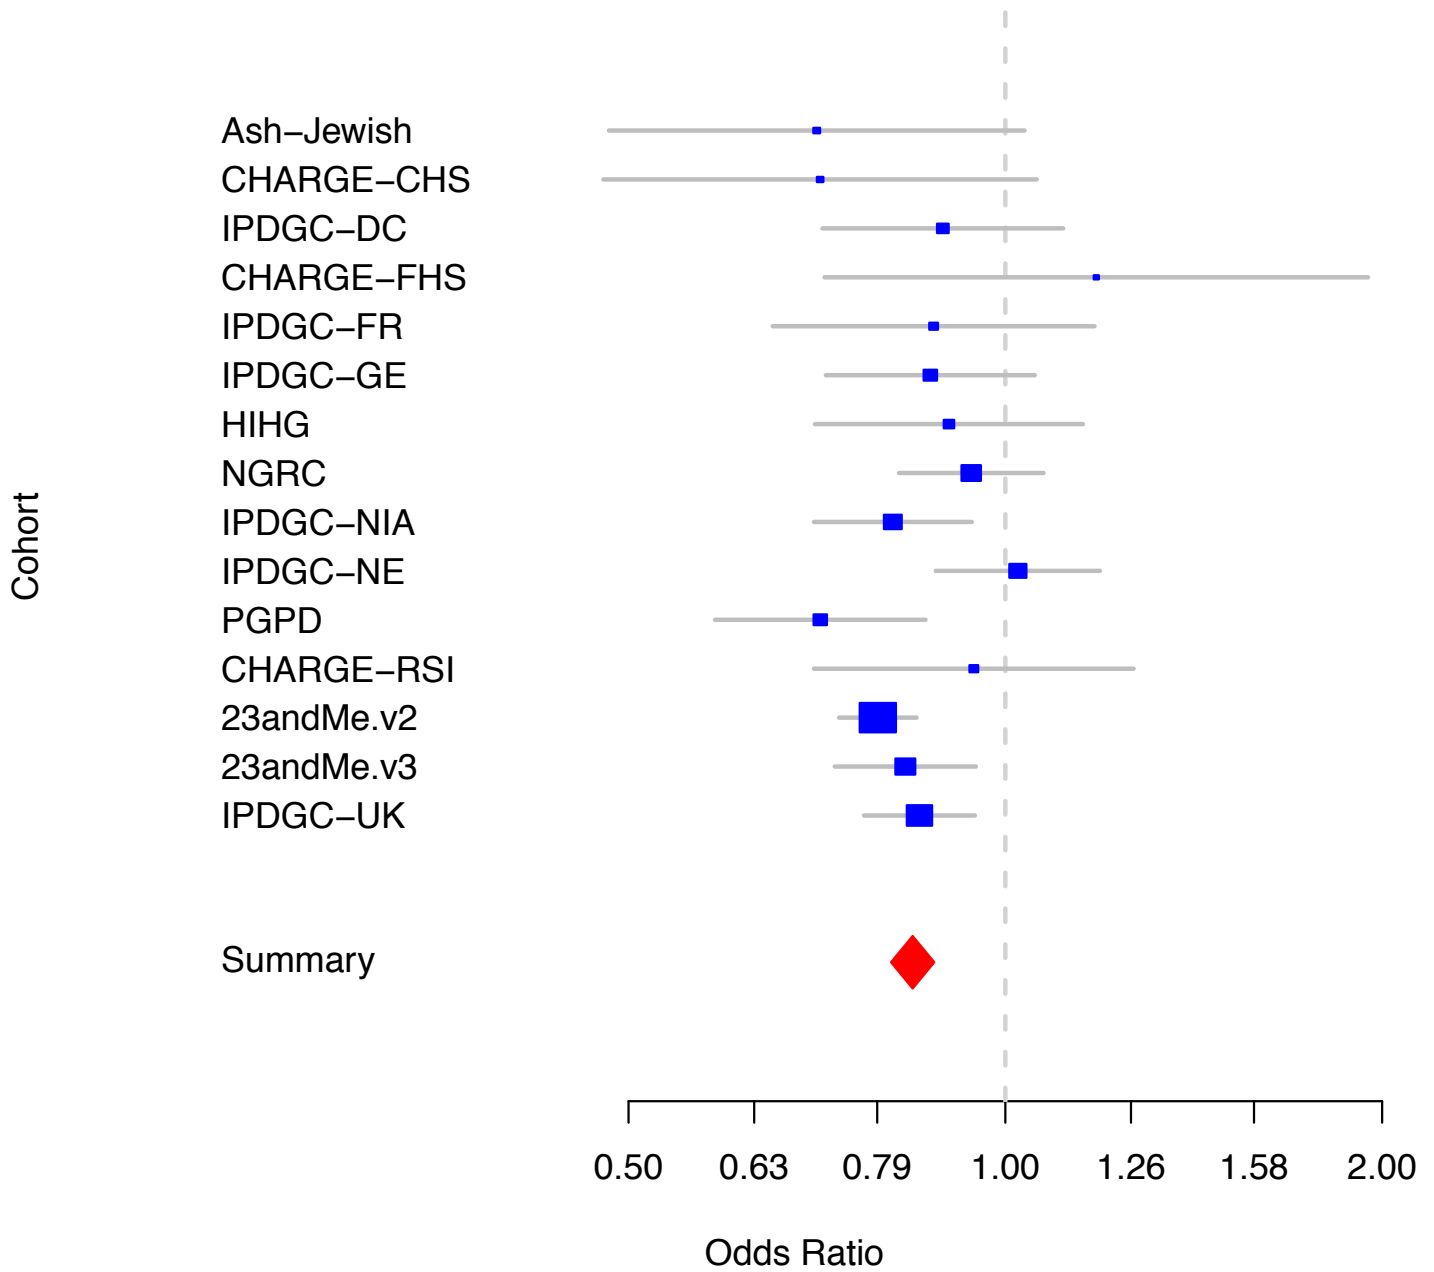

# rs11724635 BST1 Discovery SNP

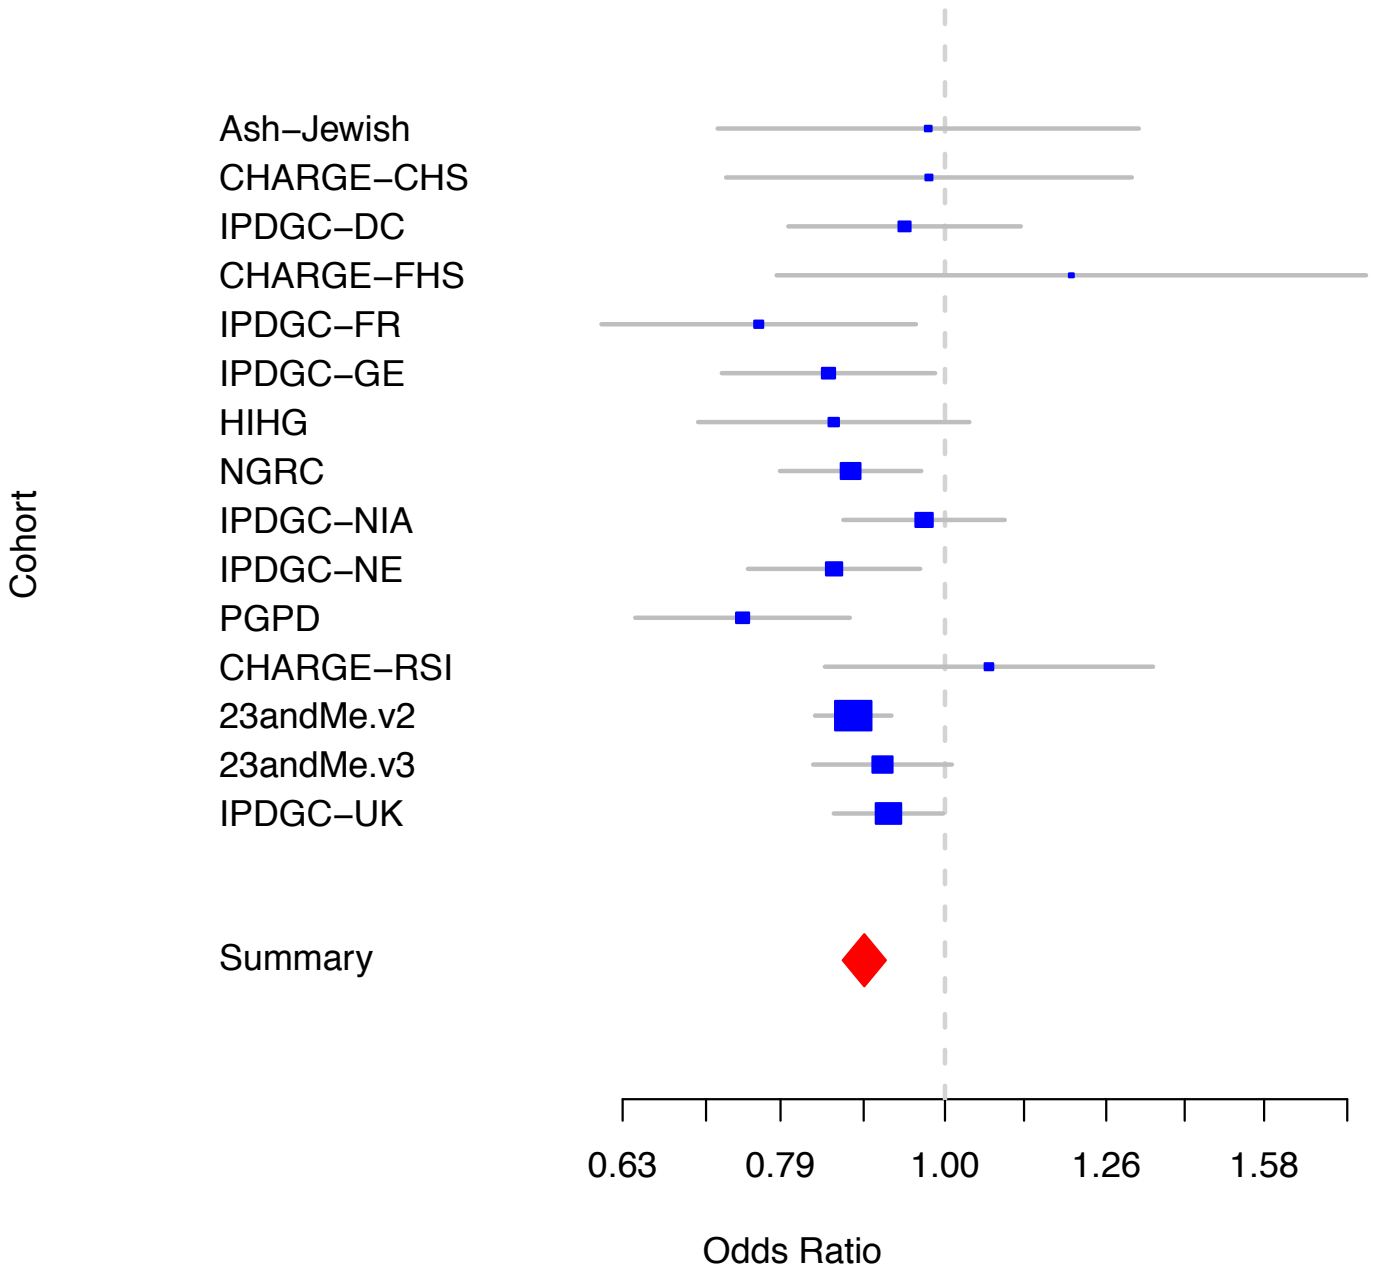

# rs34311866 TMEM175/GAK/DGKQ Discovery SNP

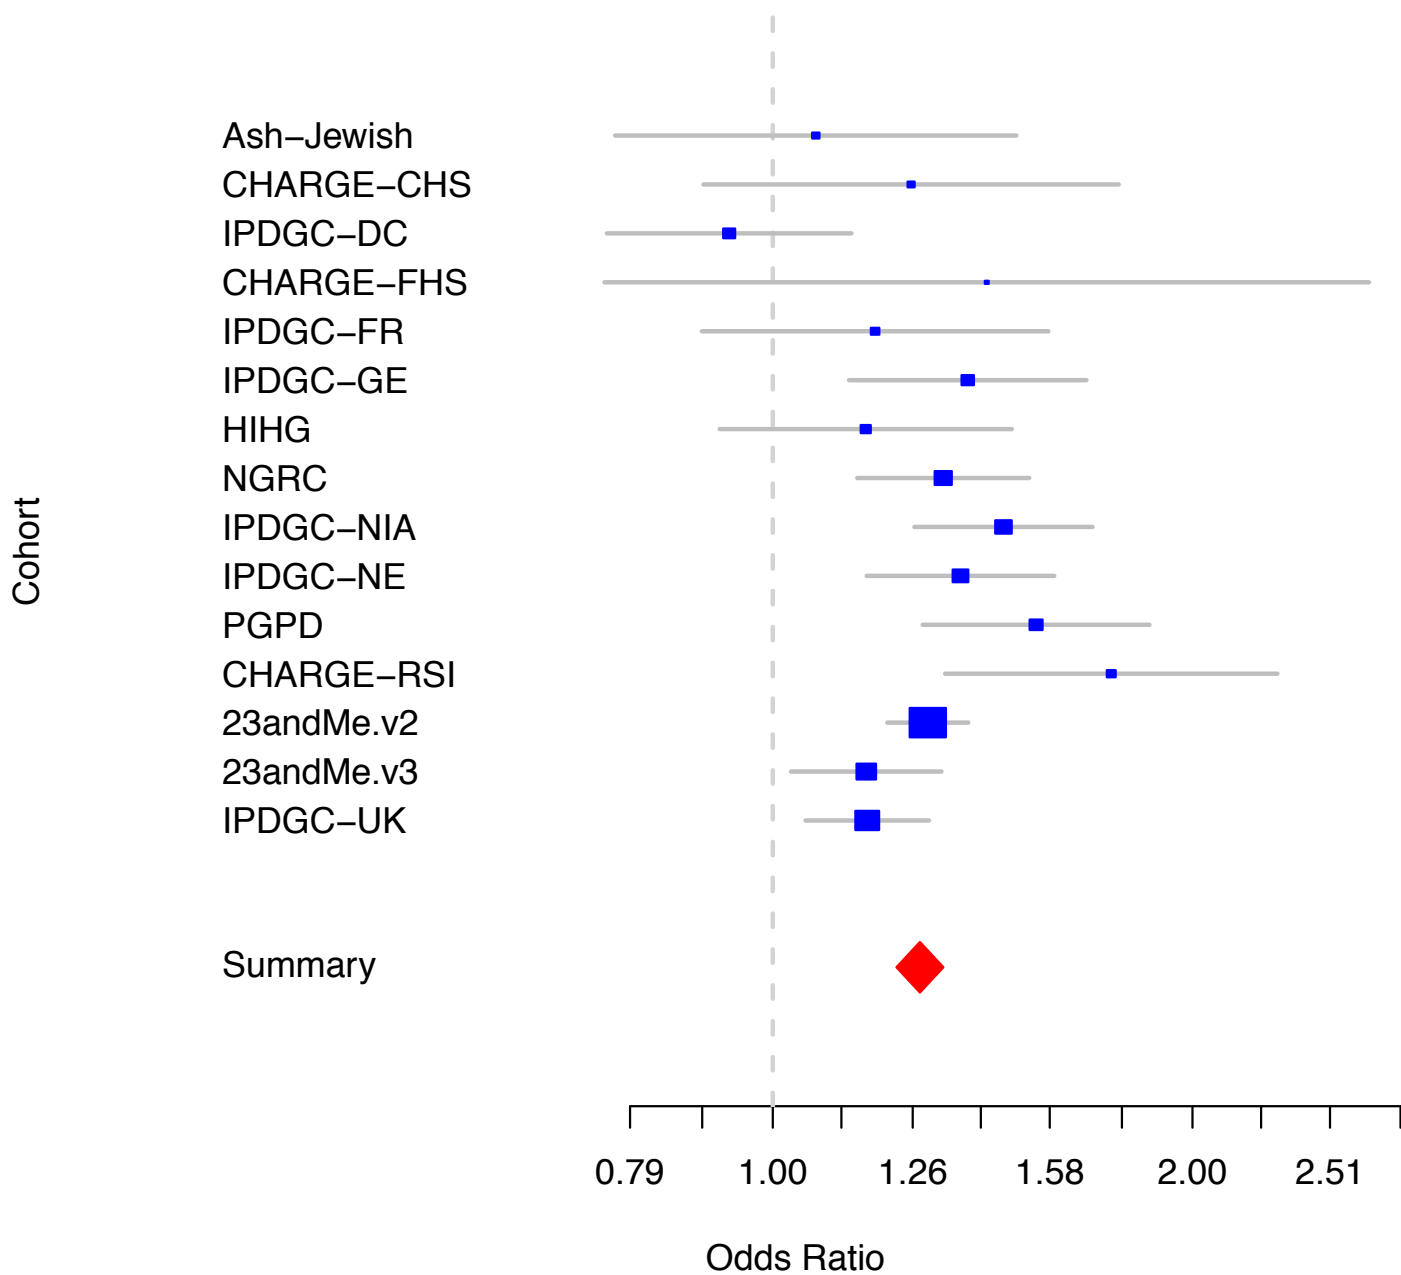



## rs6812193 FAM47E/SCARB2 Discovery SNP

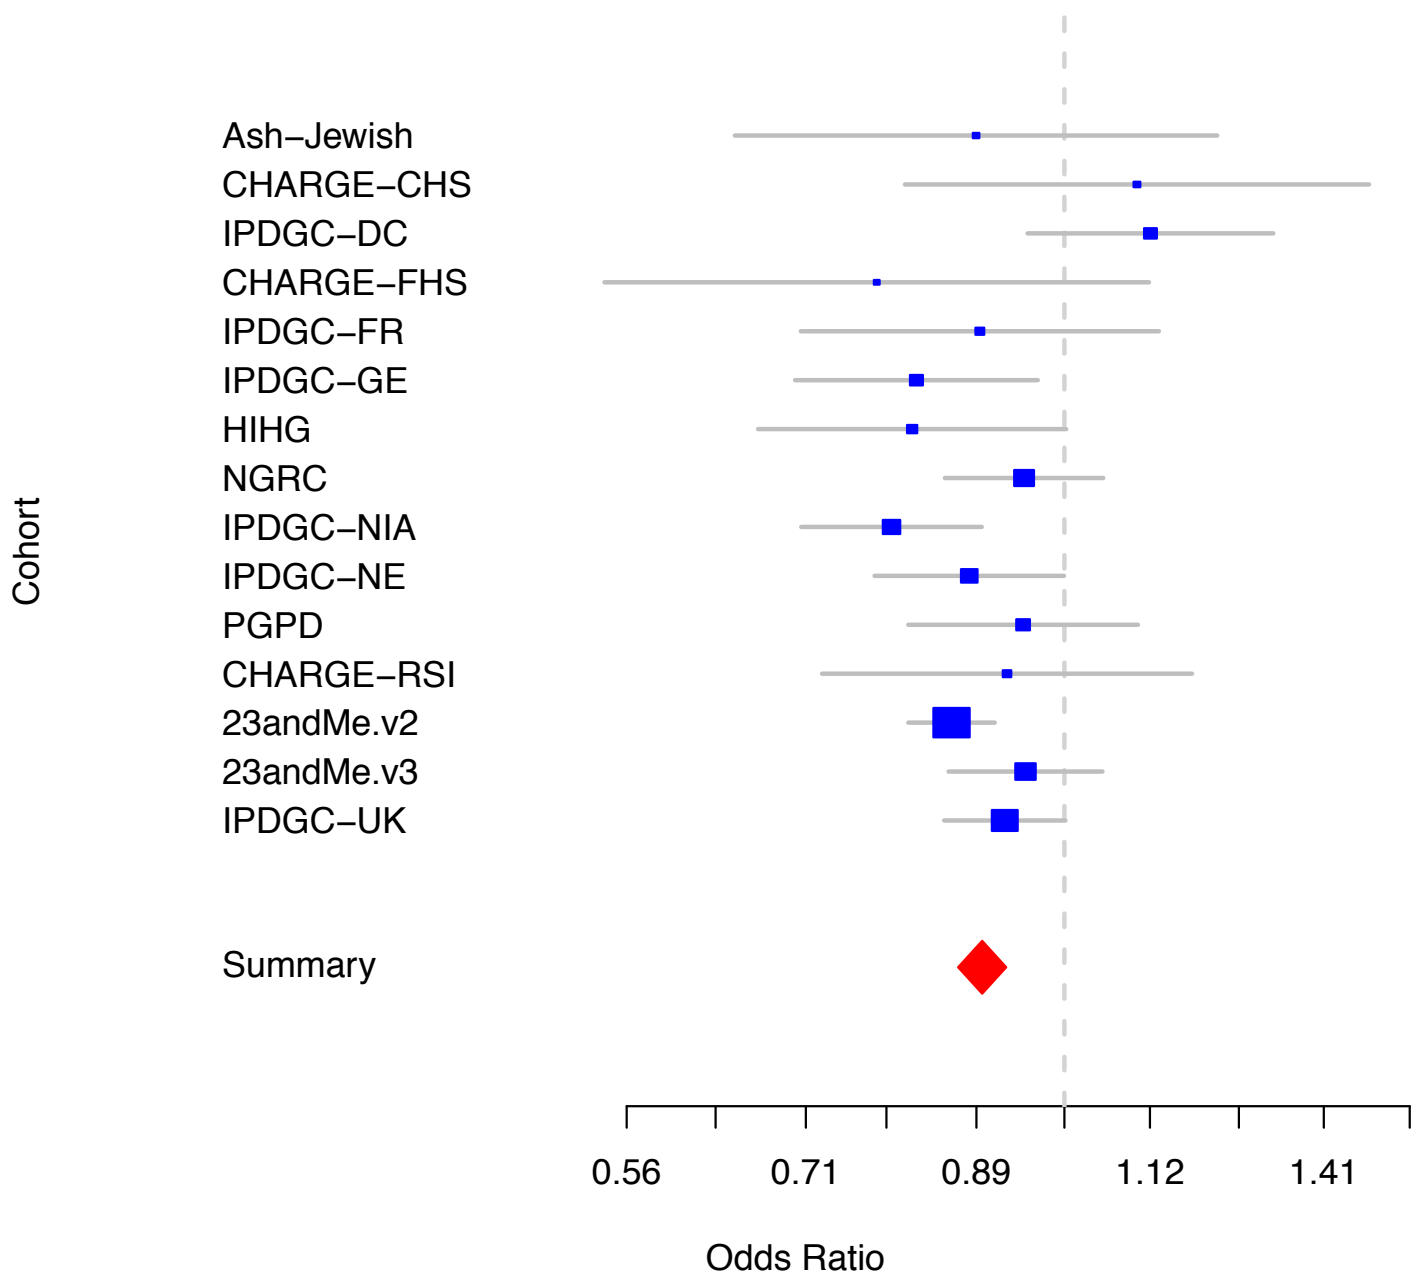

### rs356182 SNCA Discovery SNP

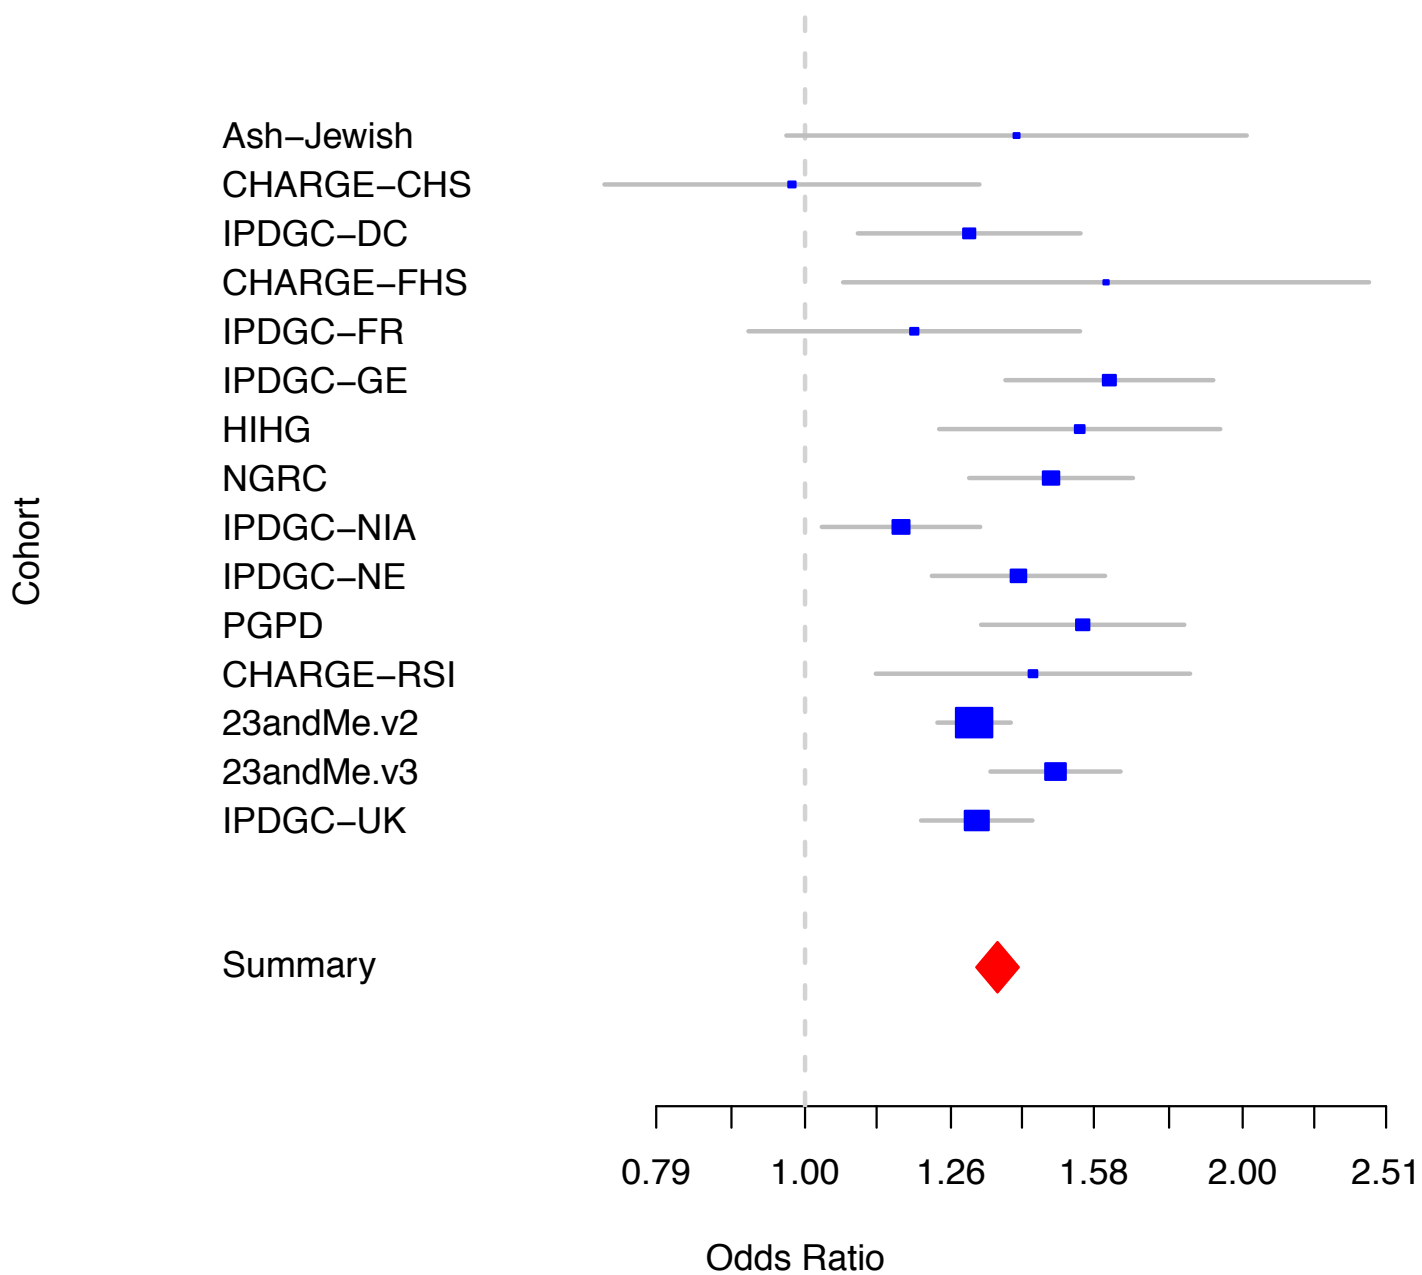

## rs9275326 HLA-DQB1 Discovery SNP

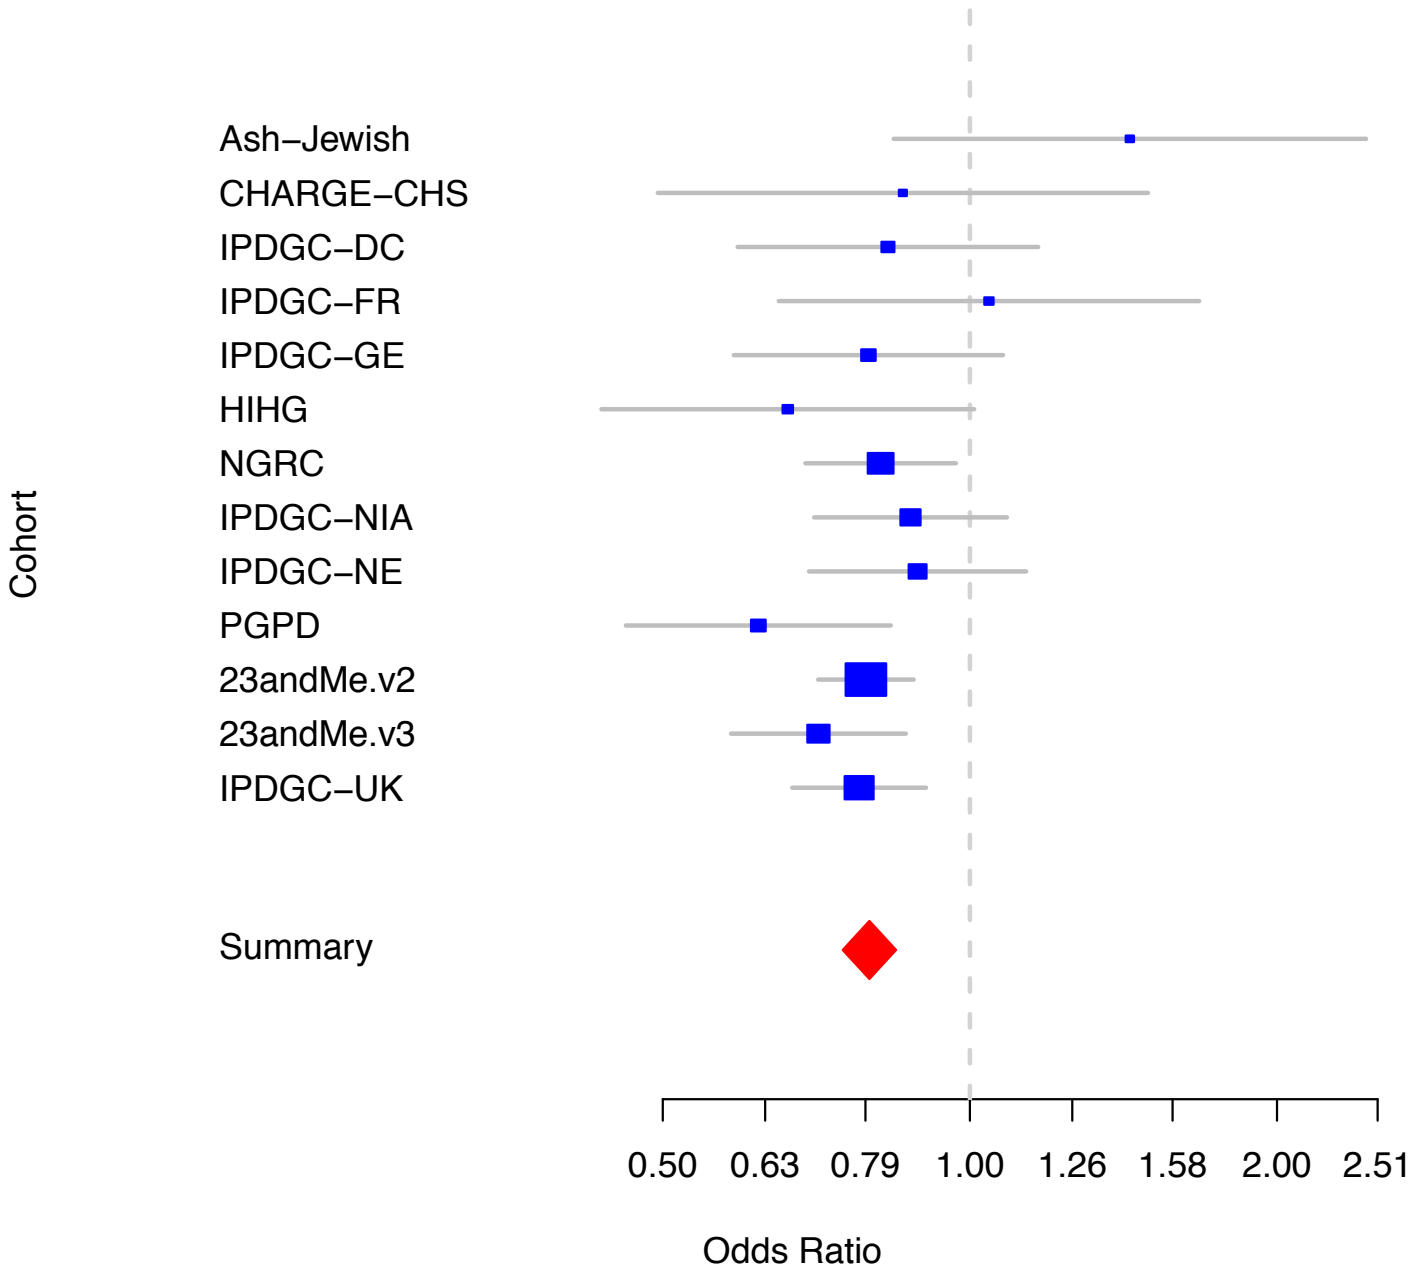

# rs199347 GPNMB Discovery SNP

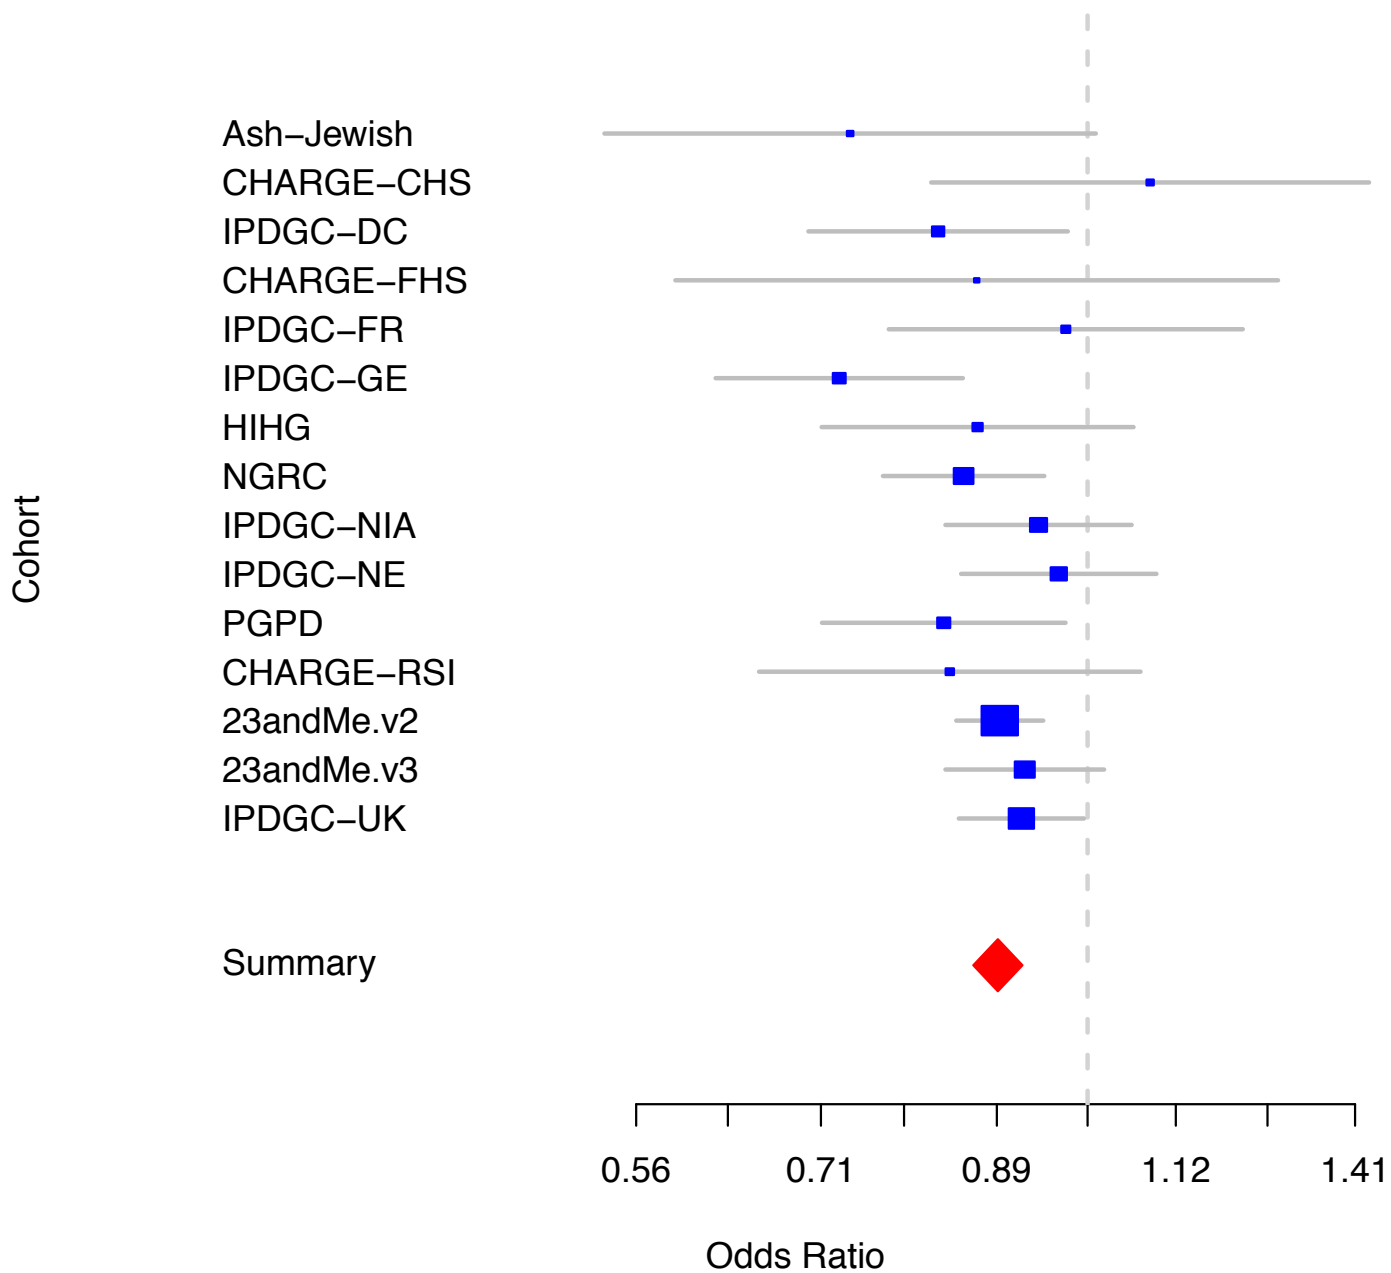

# rs3793947 DLG2 Discovery SNP

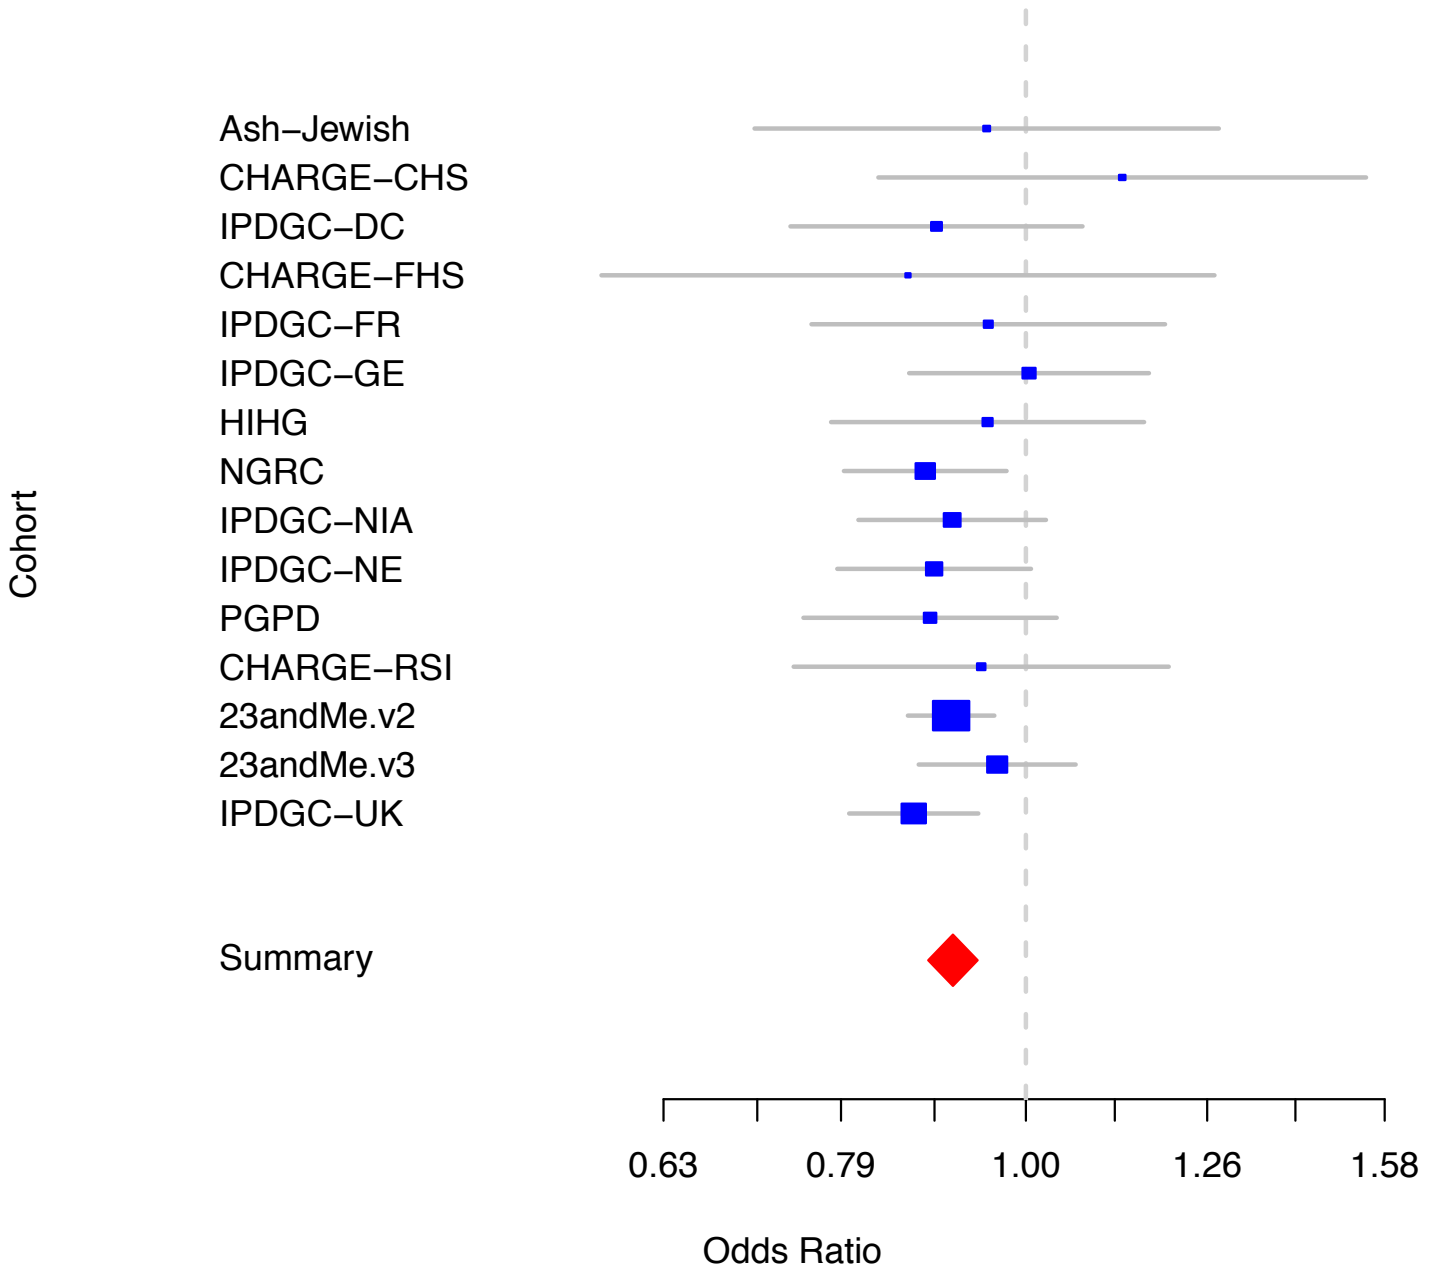

# rs117896735 INPP5F Discovery SNP

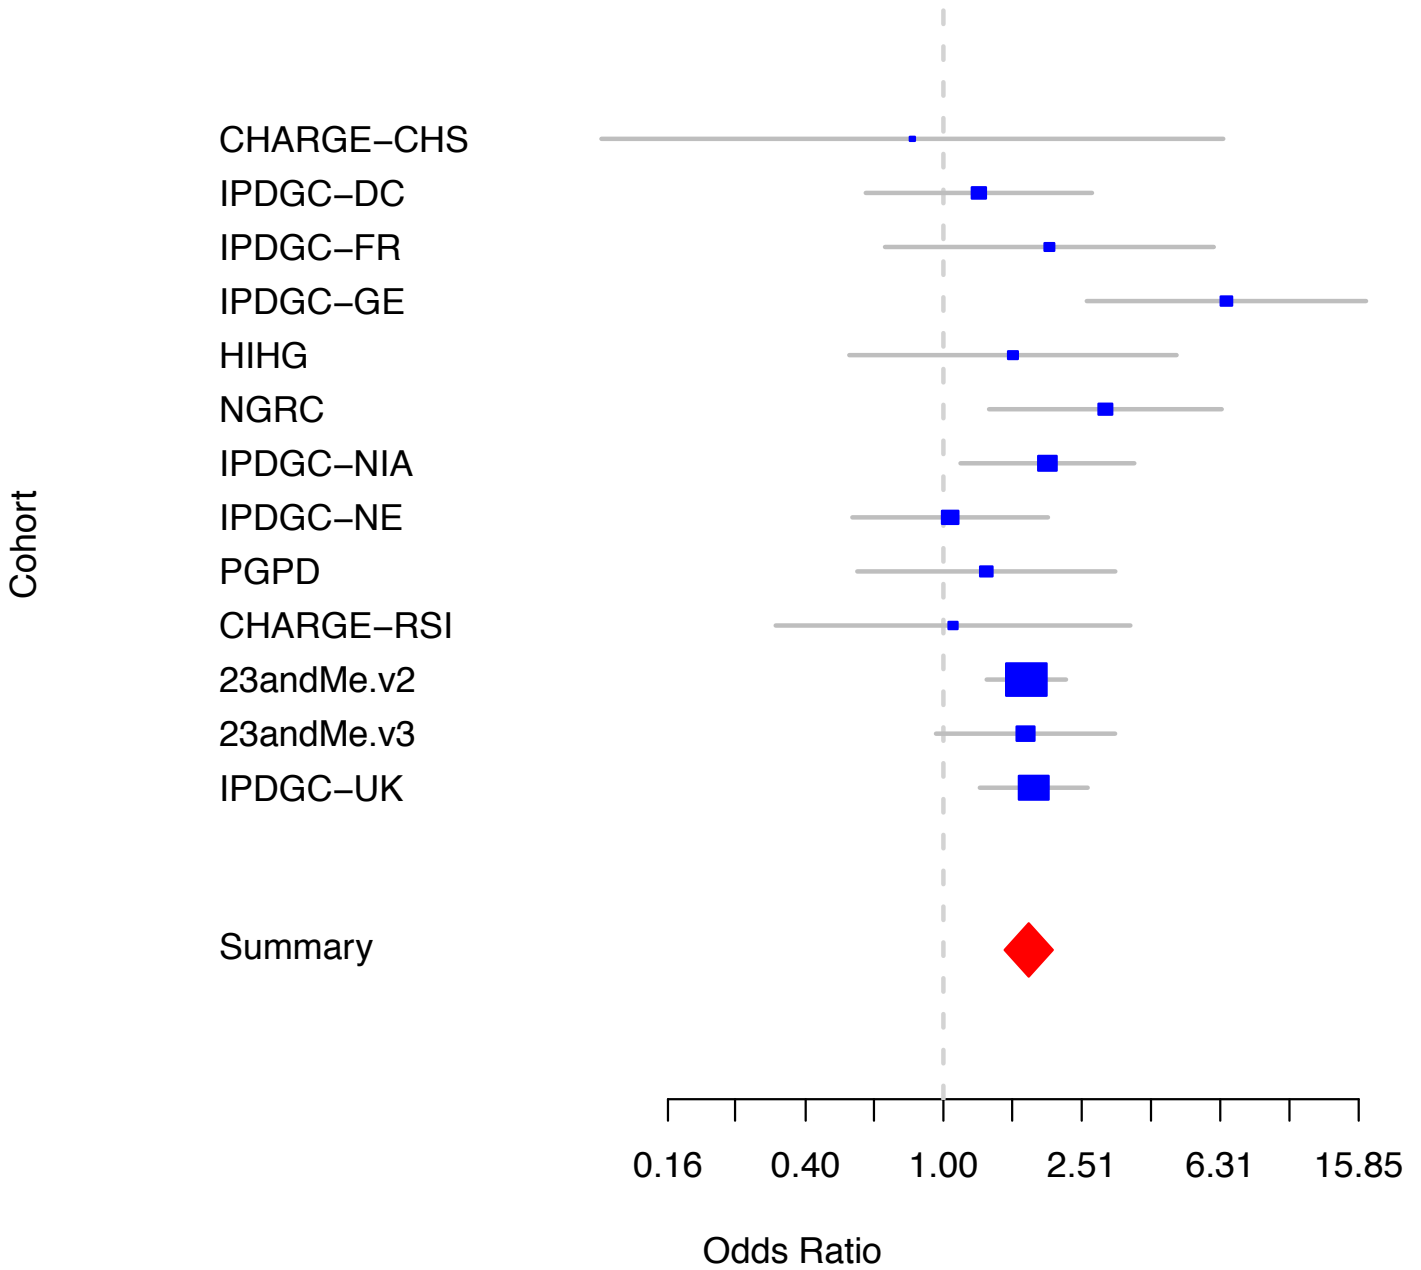

# rs329648 LOC283174 Discovery SNP

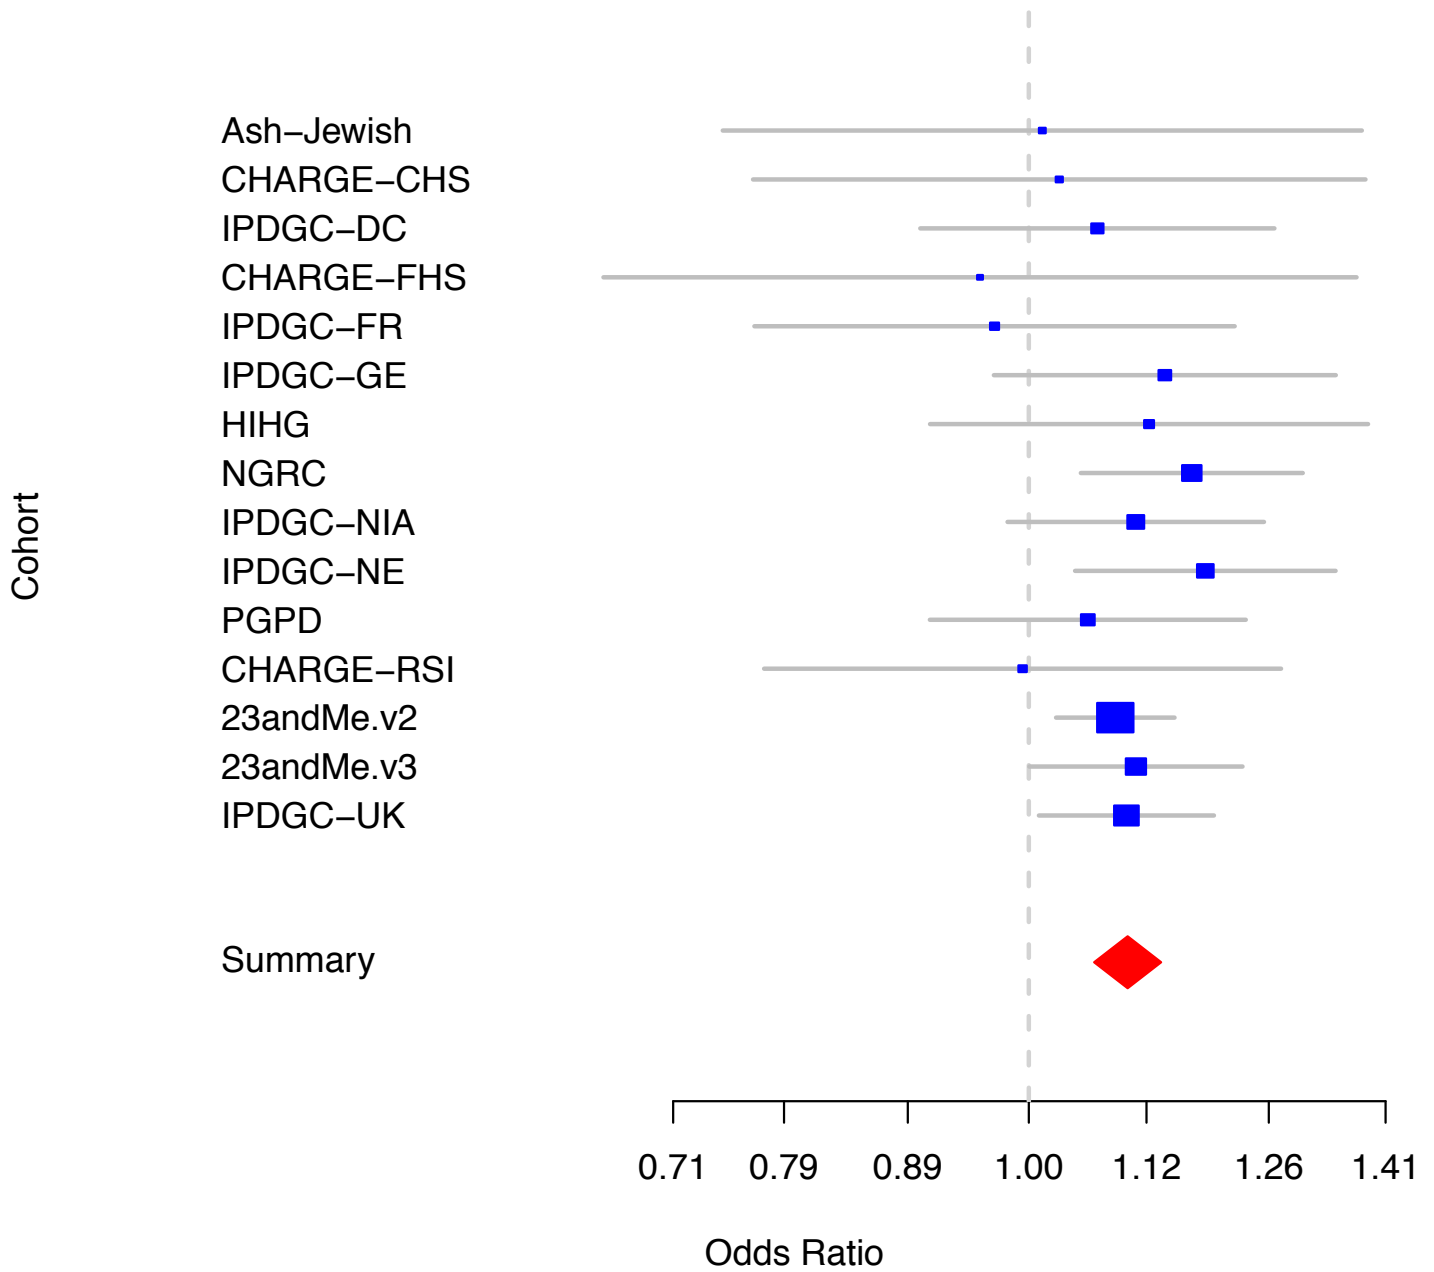

# rs76904798 LRRK2 Discovery SNP

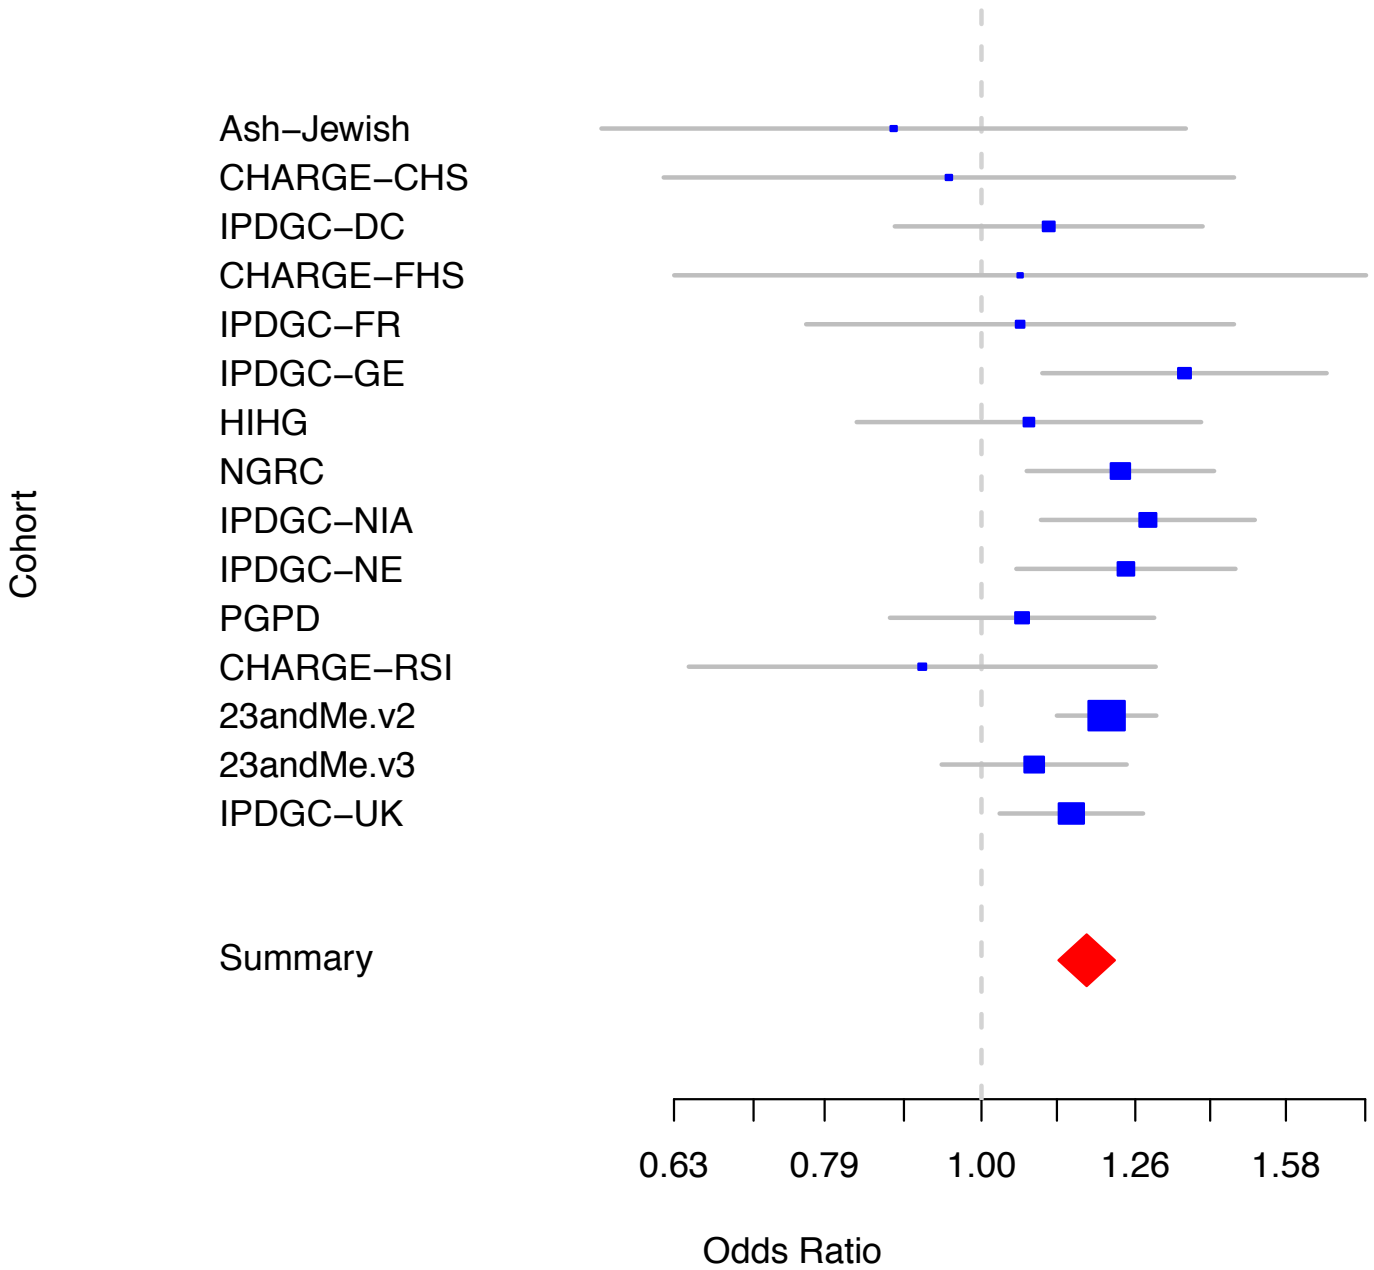



### rs11060180 CCDC62 Discovery SNP

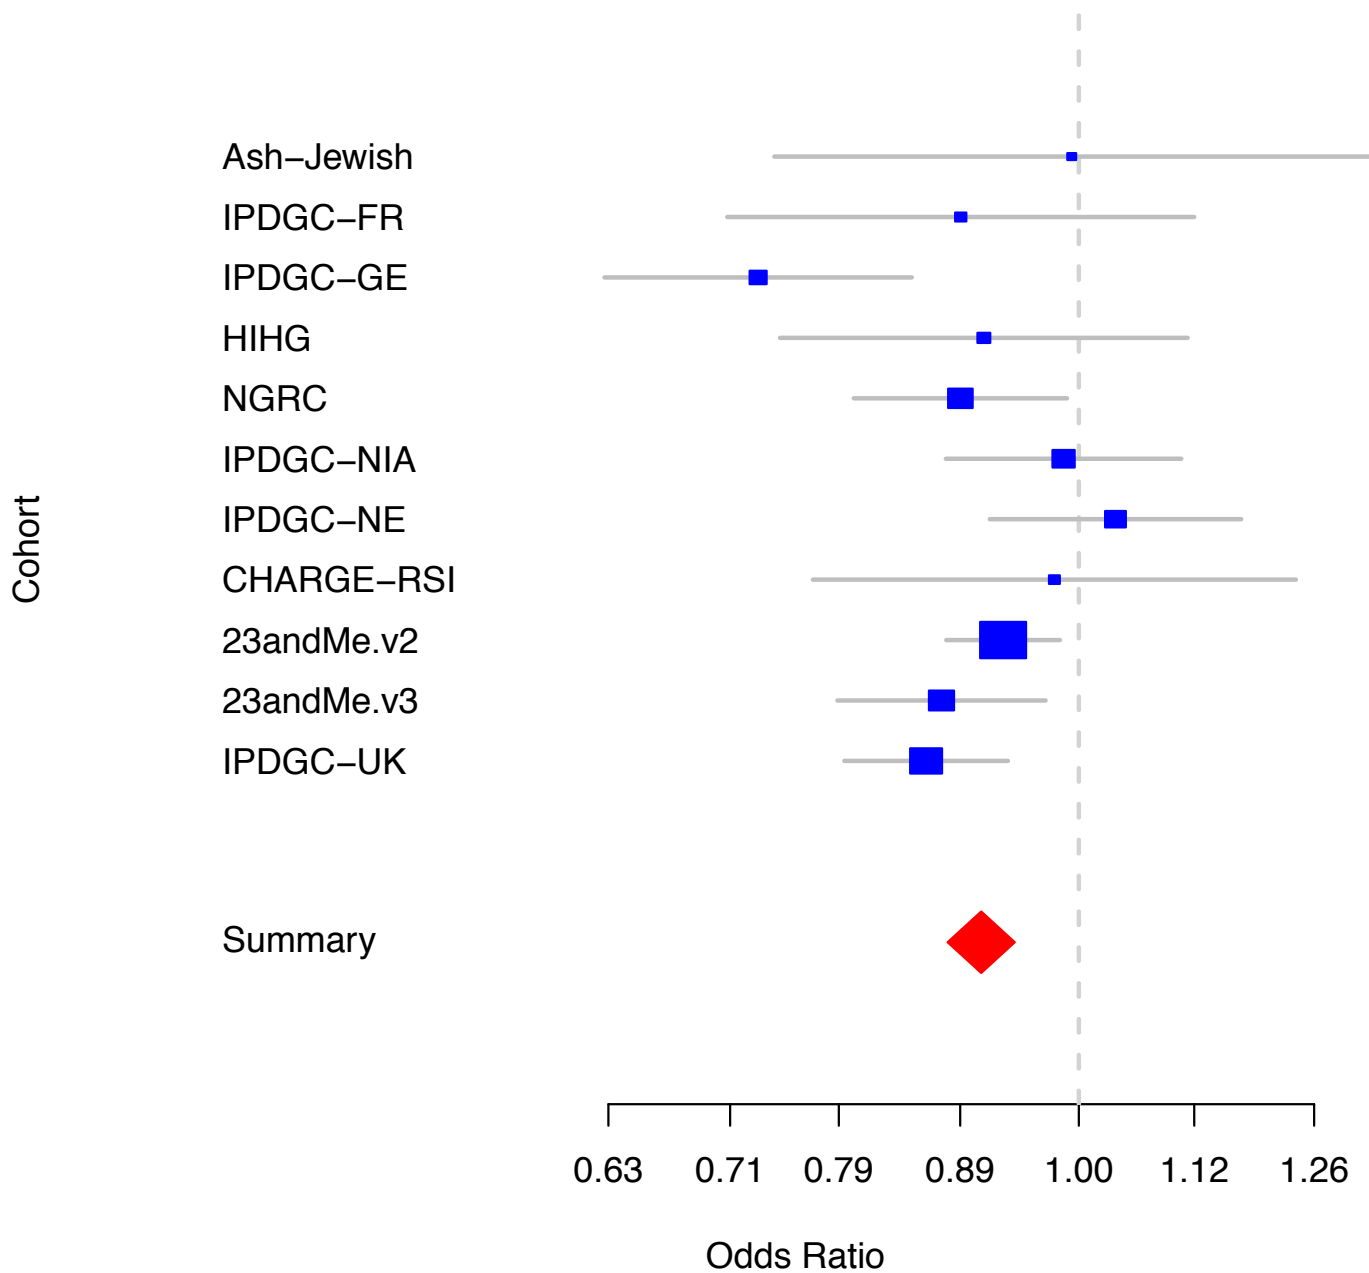

# rs1555399 TMEM229B Discovery SNP

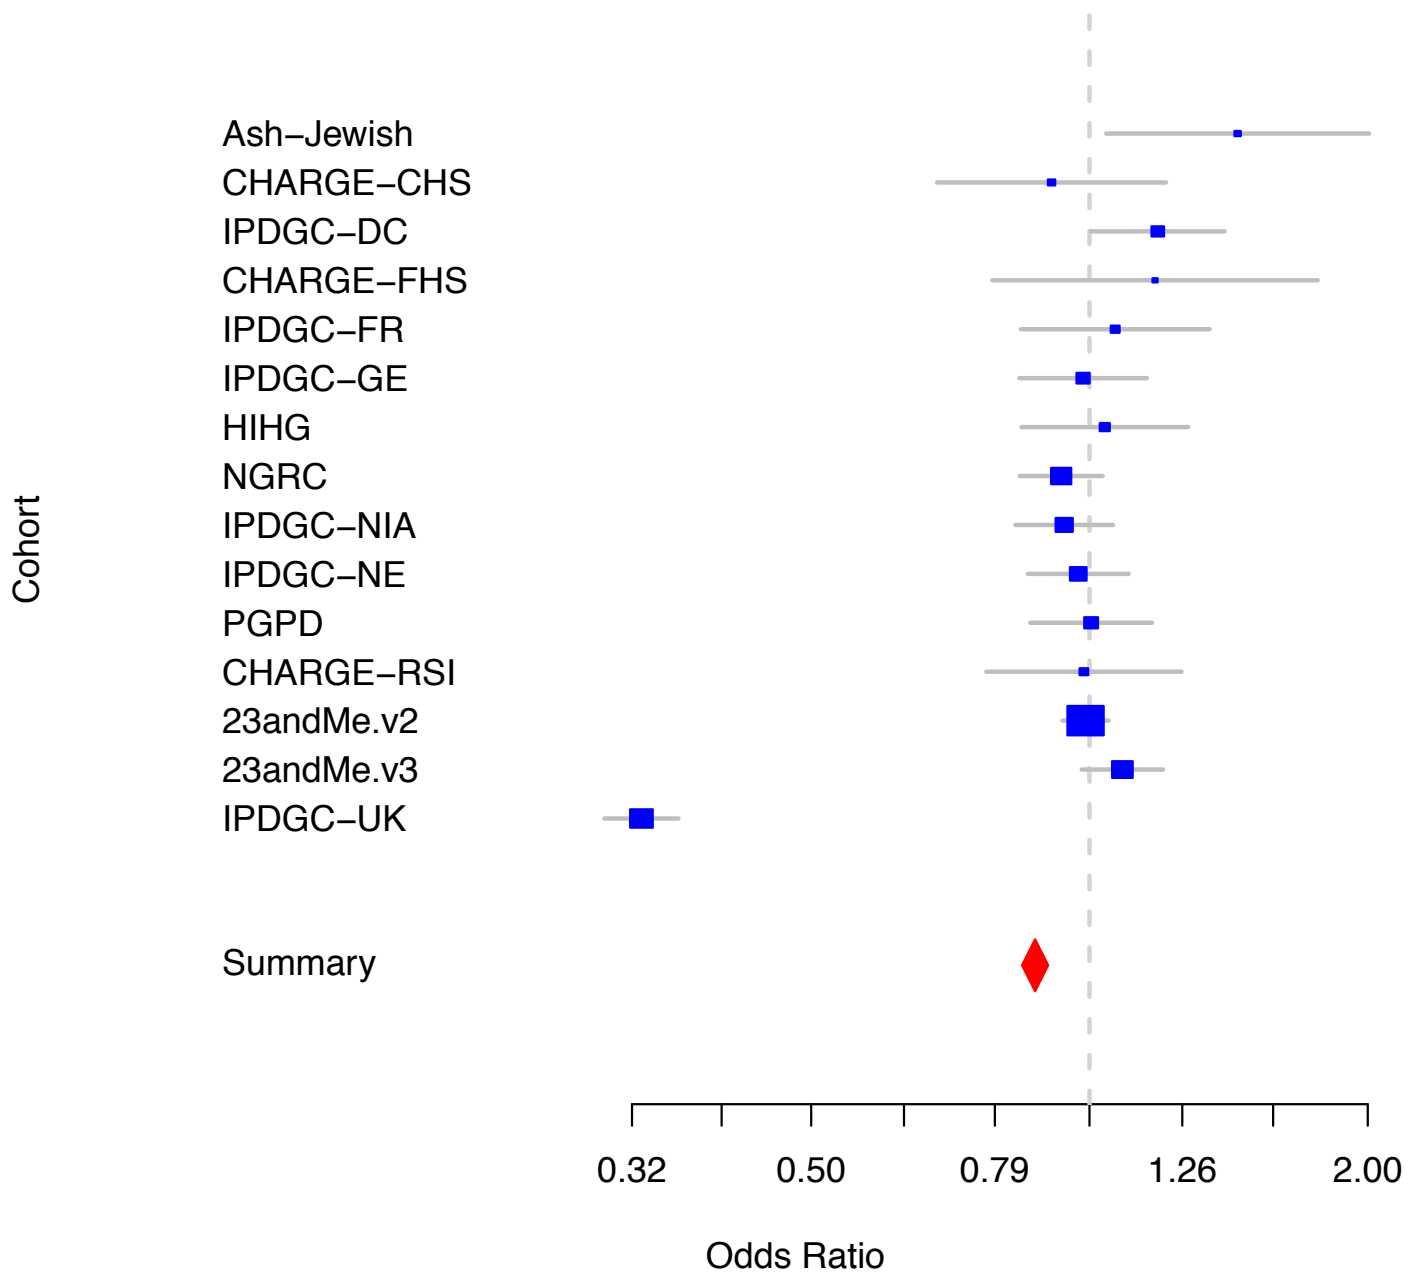

# rs11158026 GCH1 Discovery SNP

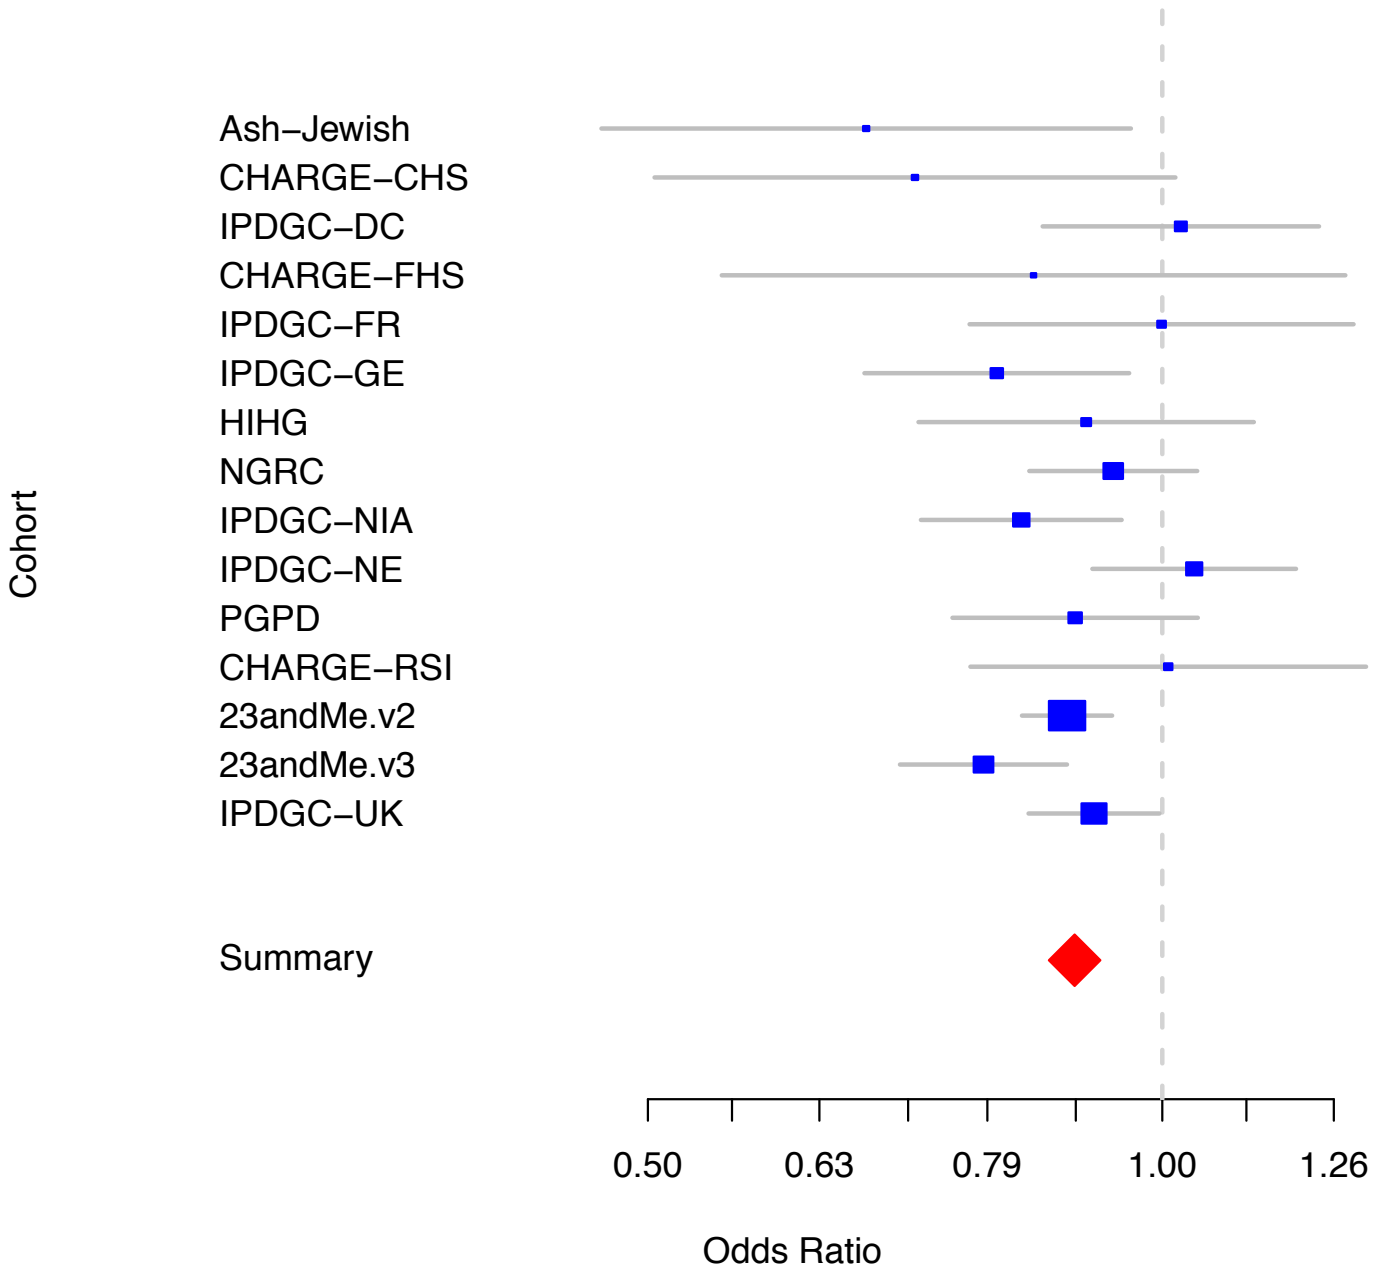

# rs2414739 VPS13C Discovery SNP

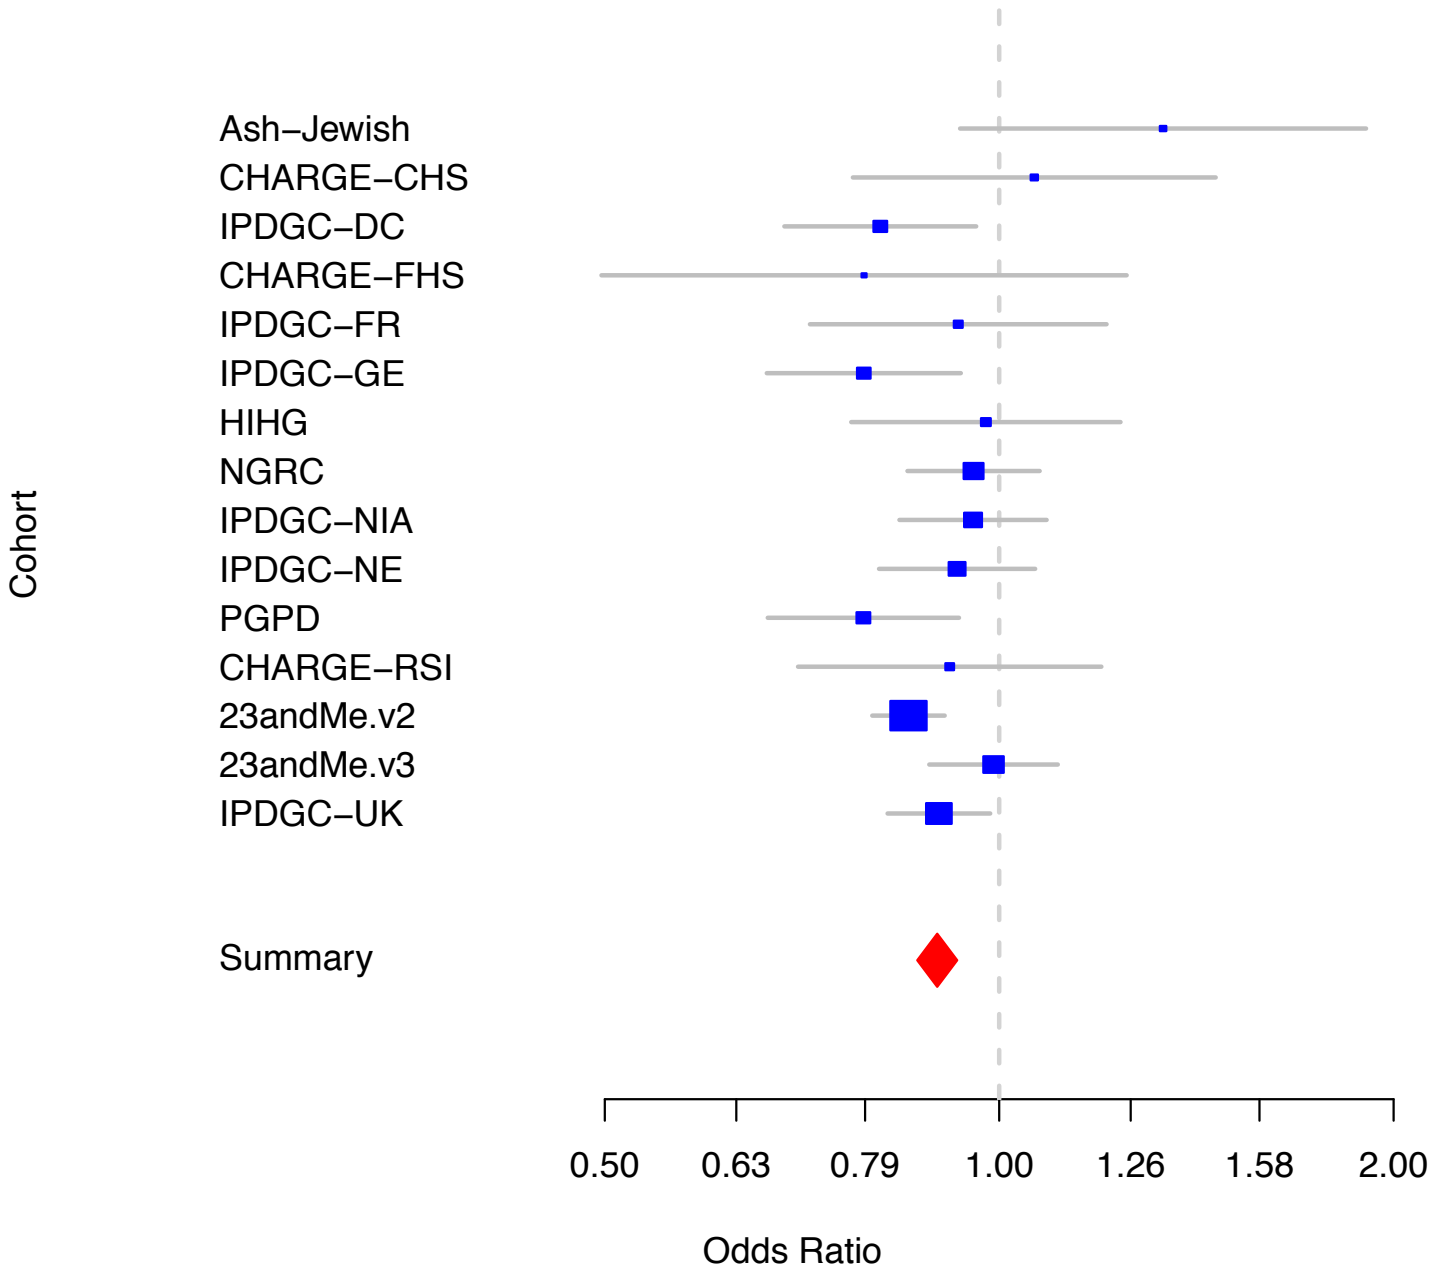

# rs14235 BCKDK/ STX1B Discovery SNP

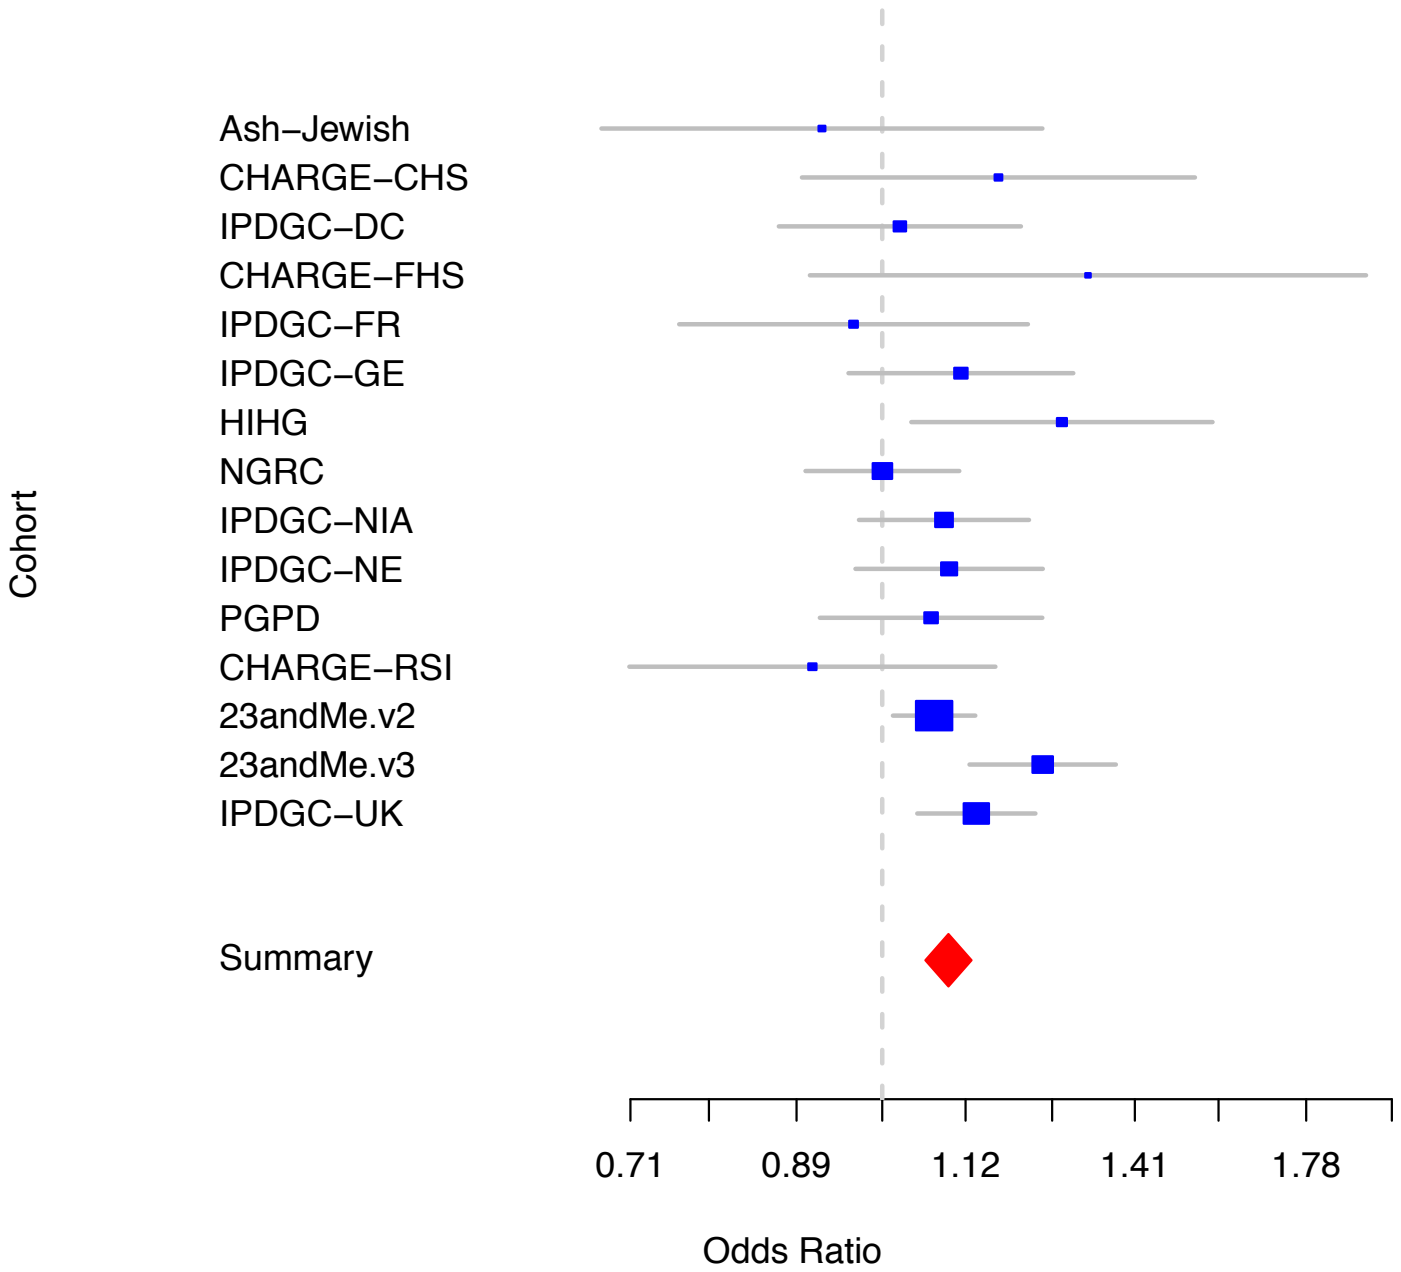

# rs17649553 MAPT Discovery SNP

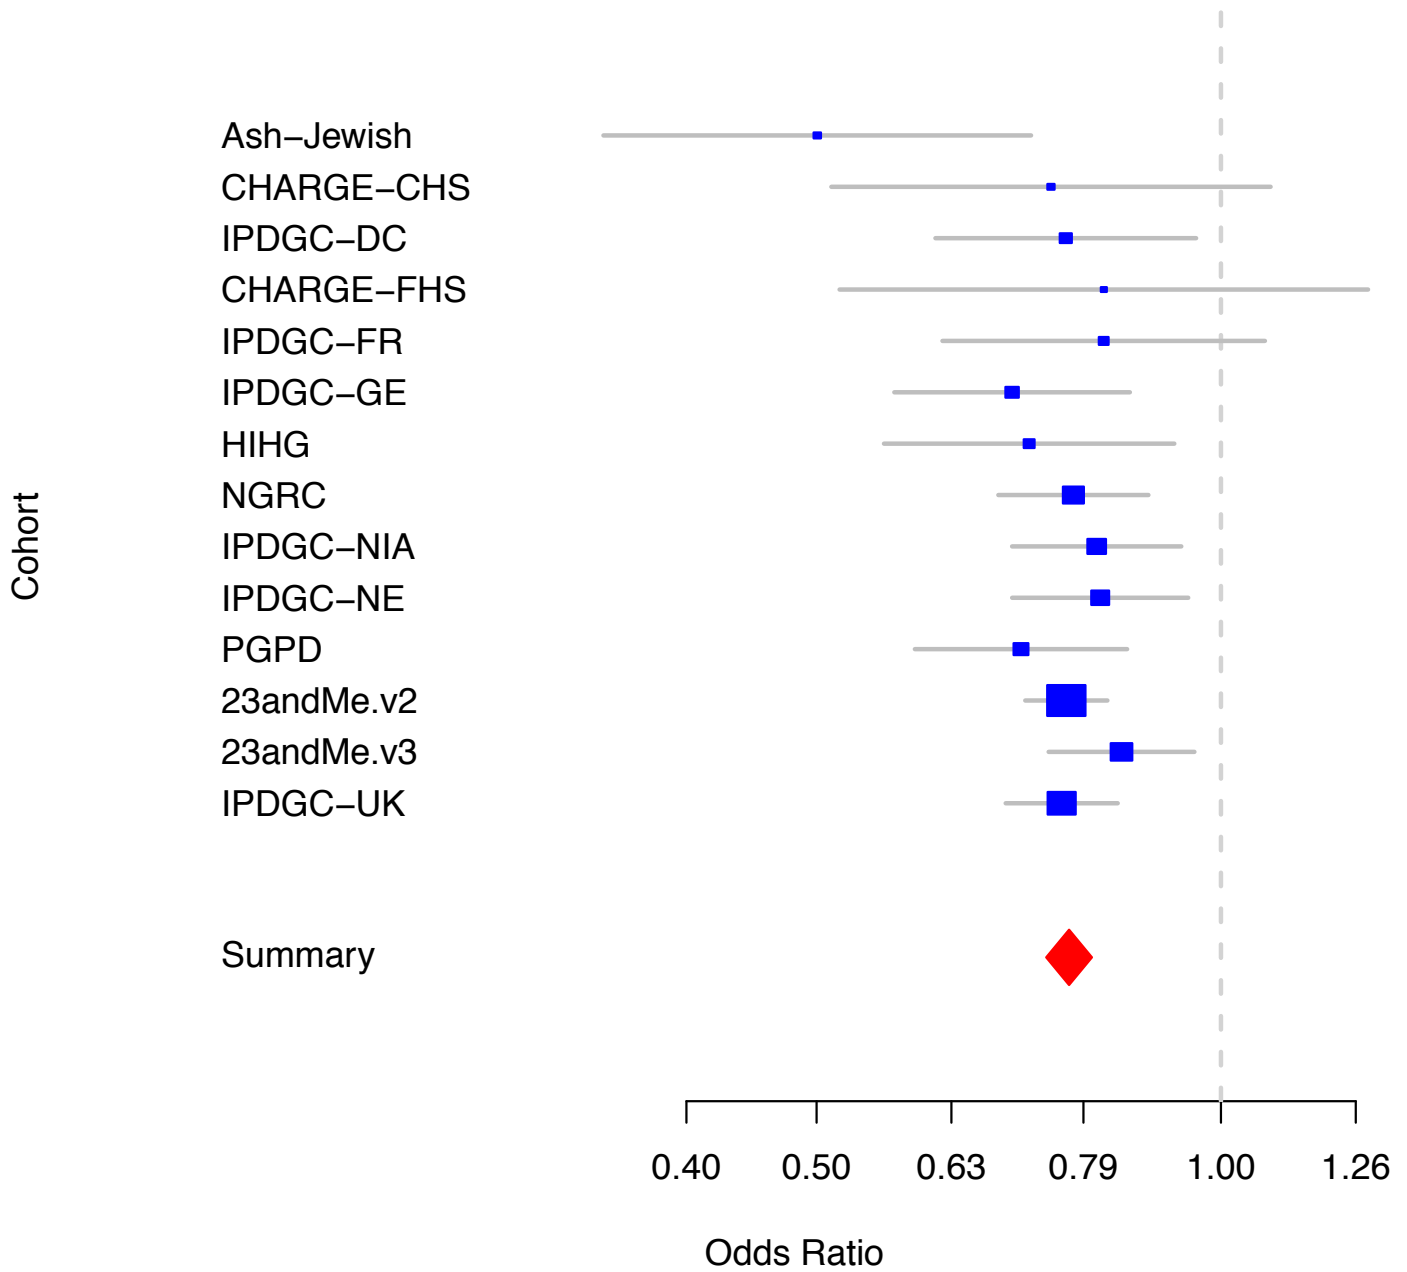

# rs12456492 RIT2 Discovery SNP

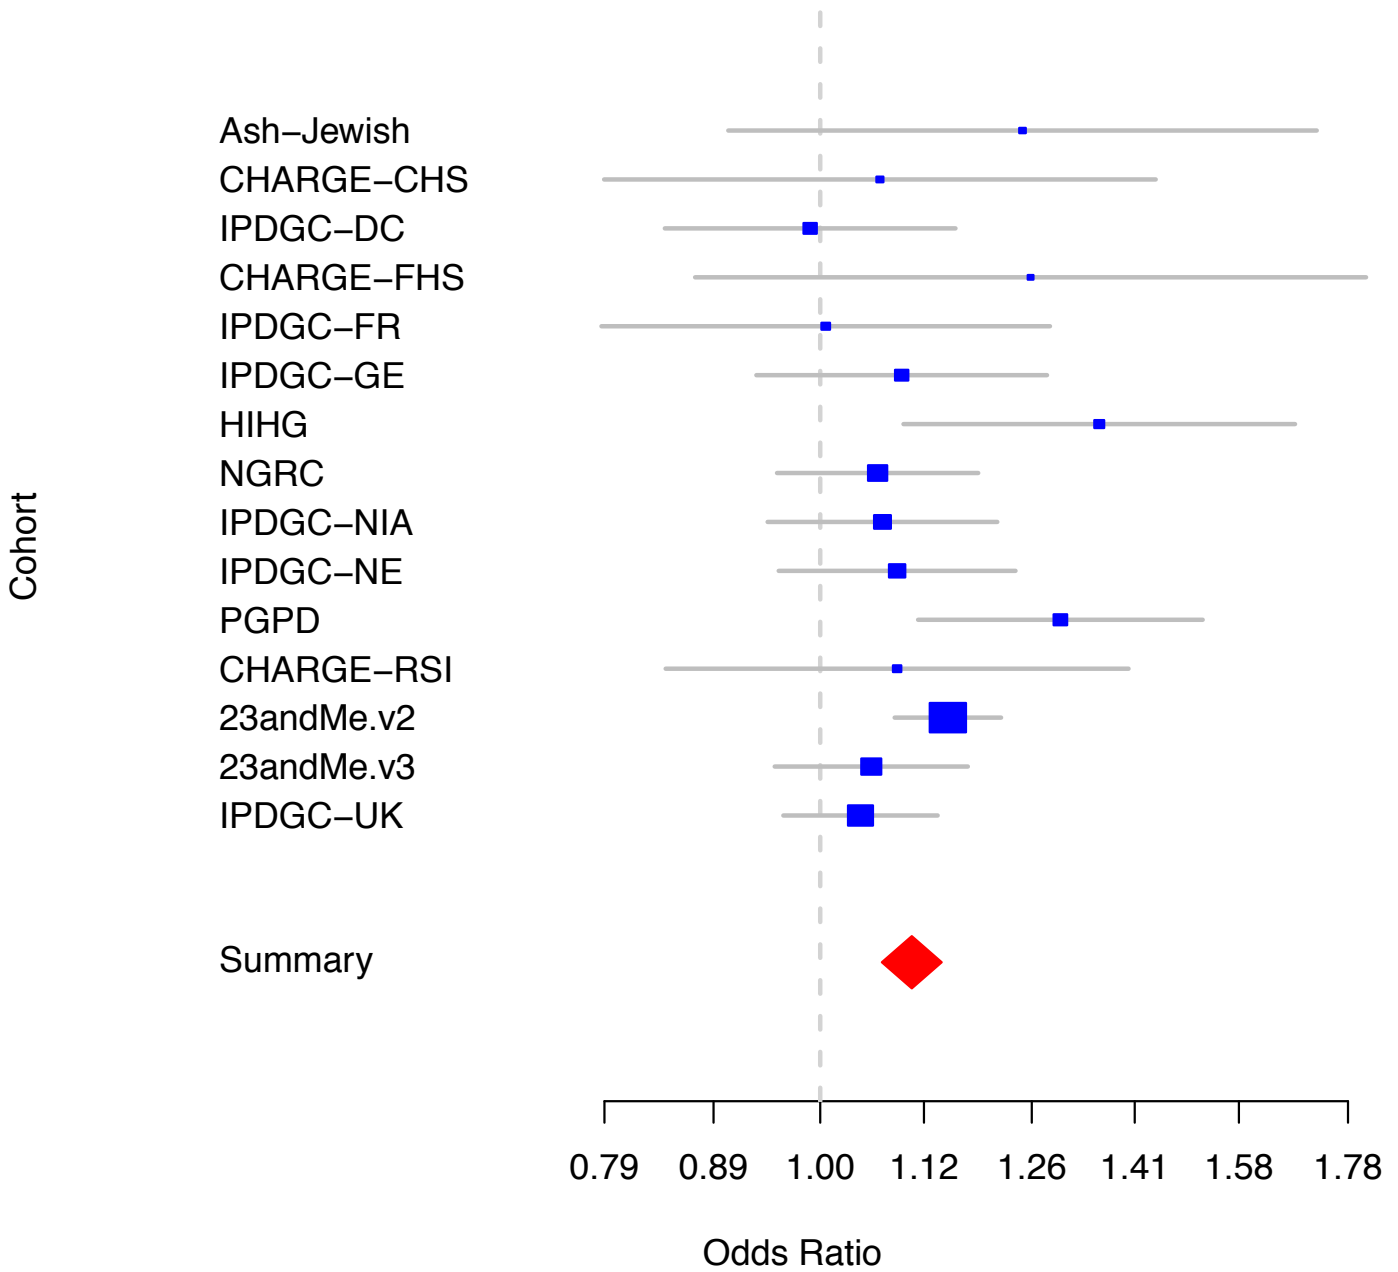

# rs62120679 SPPL2B Discovery SNP

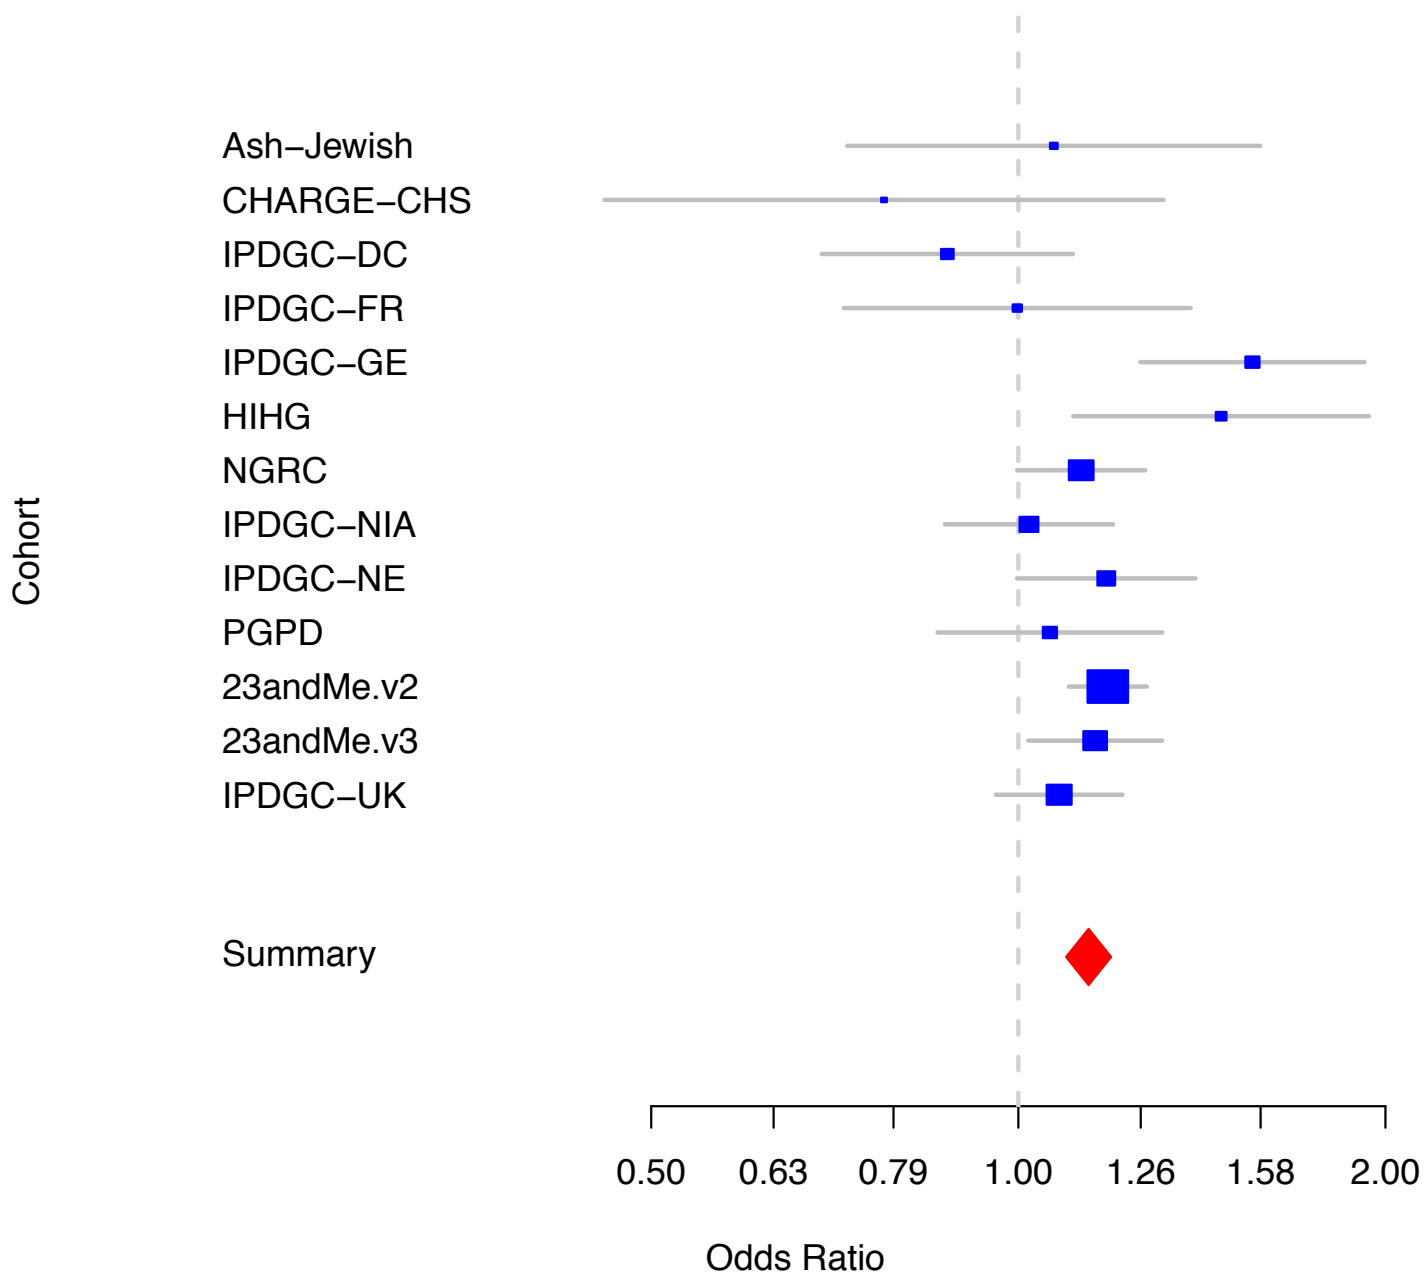



# rs8118008 DDRGK1 Discovery SNP

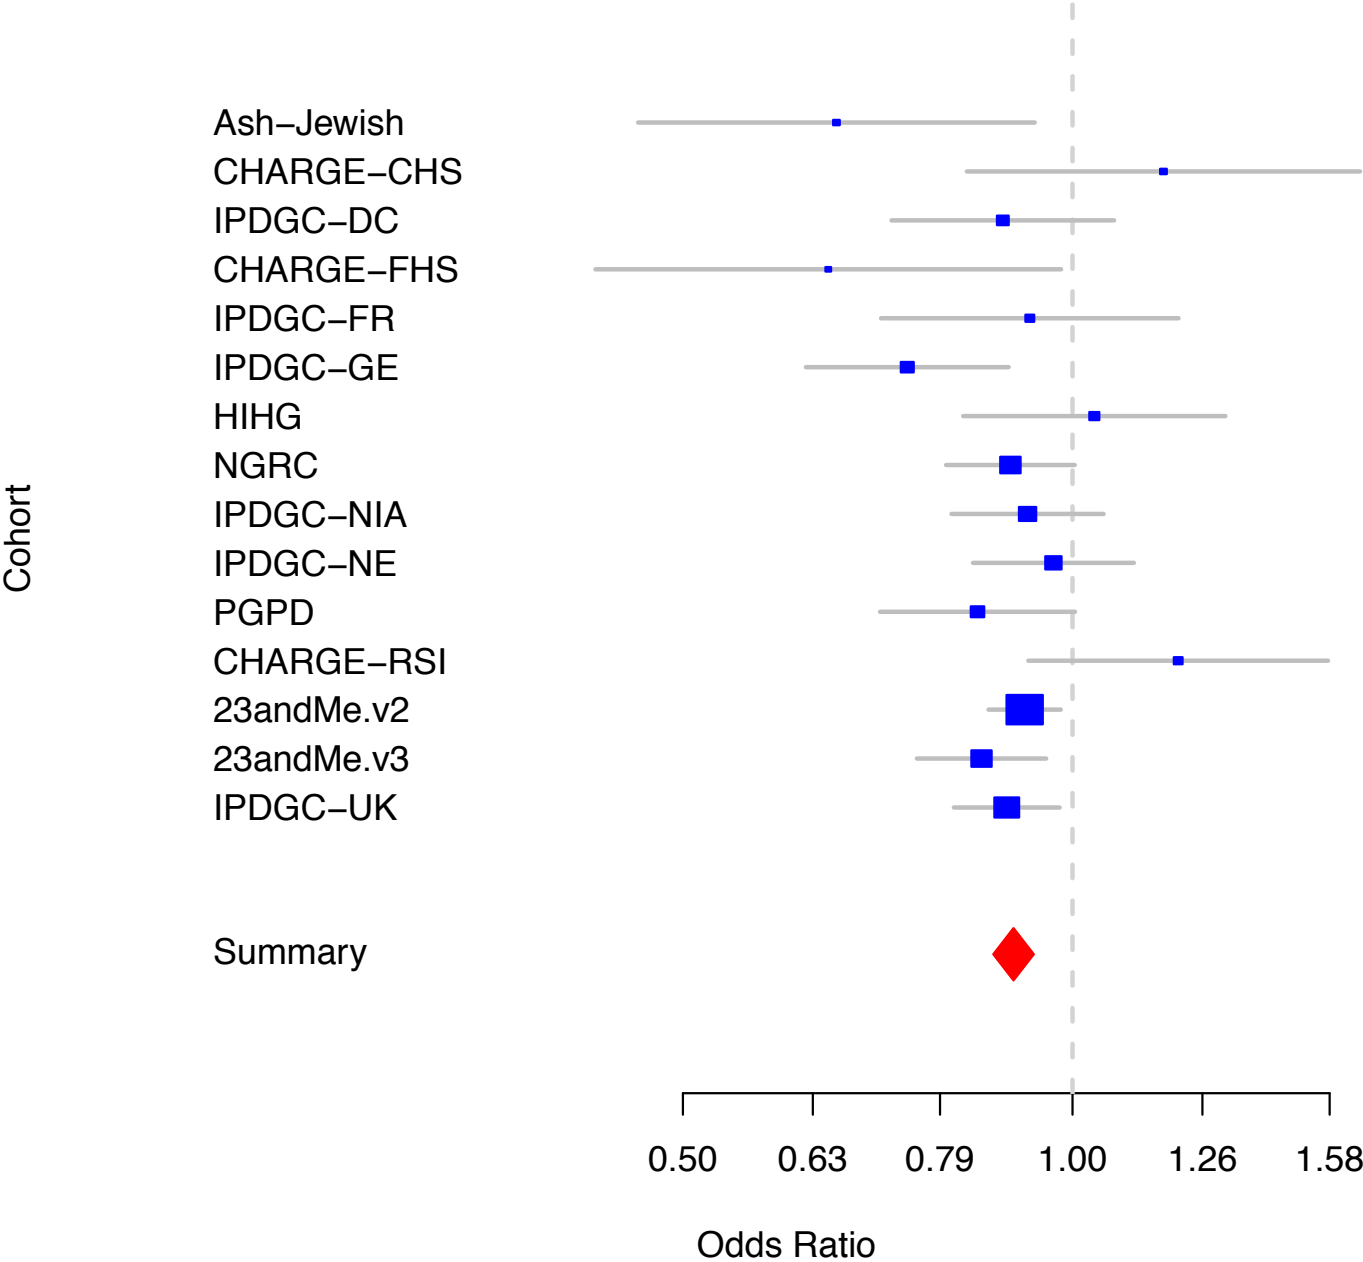

# rs34016896 NMD3 Known SNP

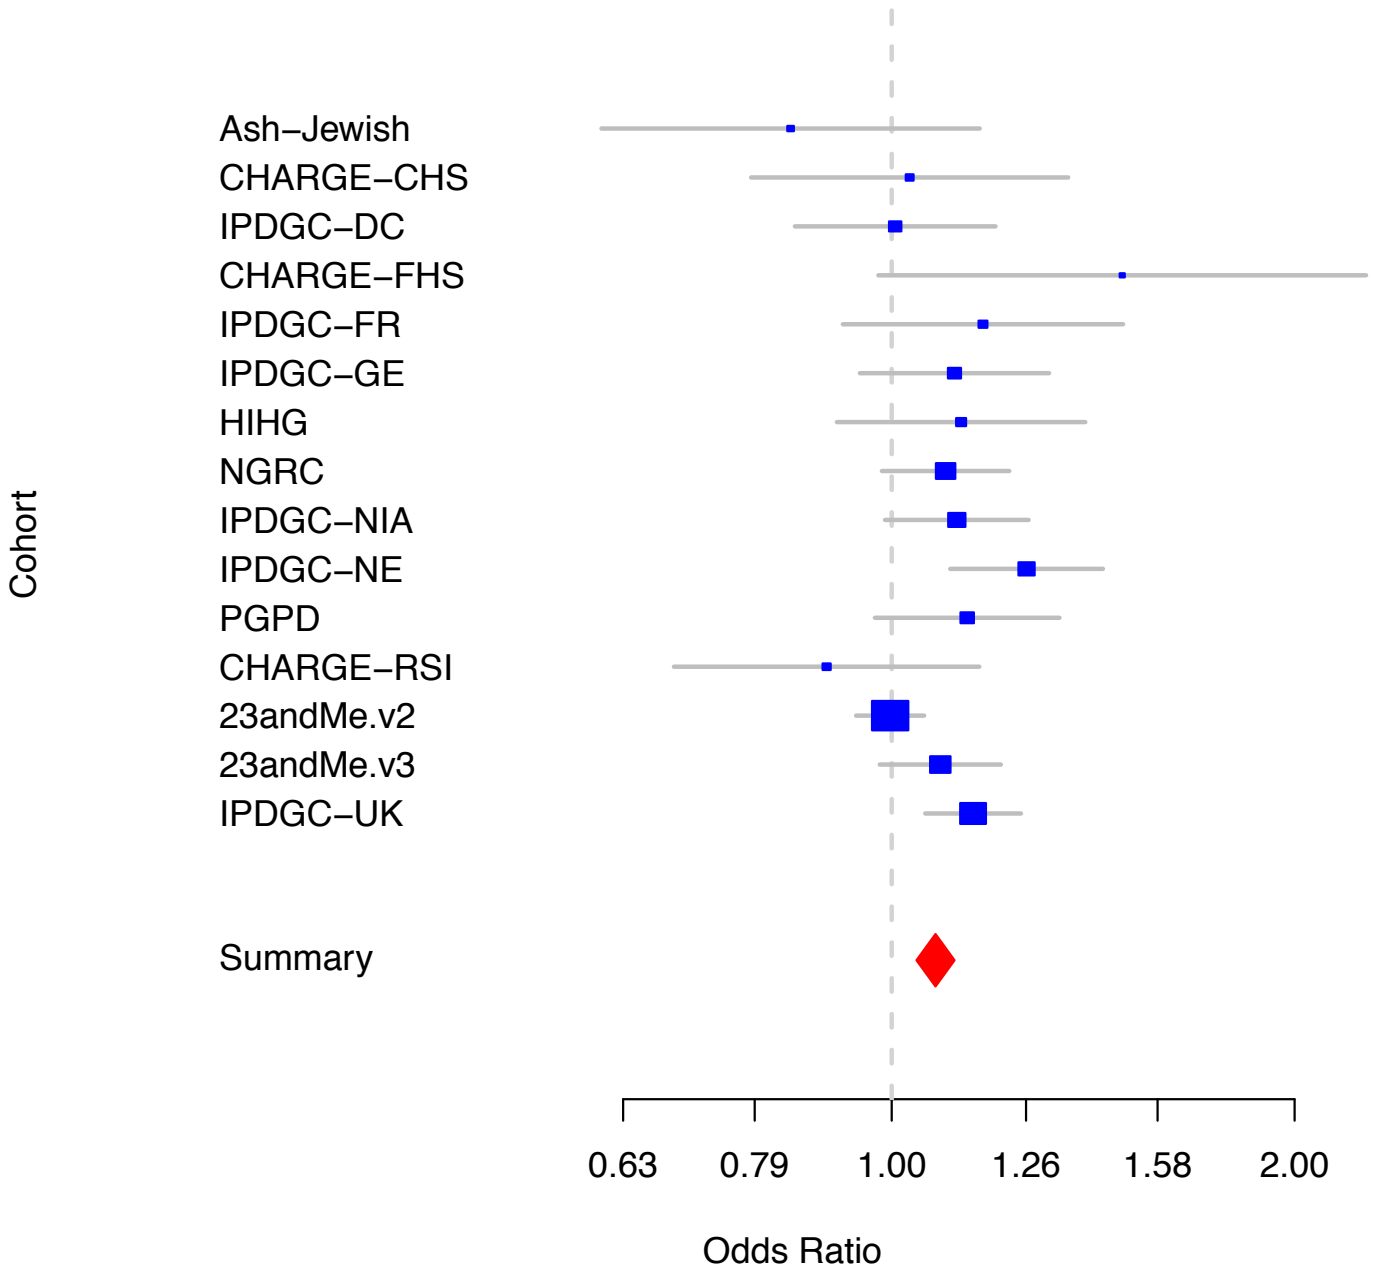

# rs591323 FGF20 Known SNP

Cohort

- Ash-Jewish
- CHARGE-CHS
- IPDGC-DC
- CHARGE-FHS
- IPDGC-FR
- IPDGC-GE
- HIHG
- NGRC
- IPDGC-NIA
- IPDGC-NE
- PGPD
- CHARGE-RSI
- 23andMe.v2
- 23andMe.v3
- IPDGC-UK

Summary

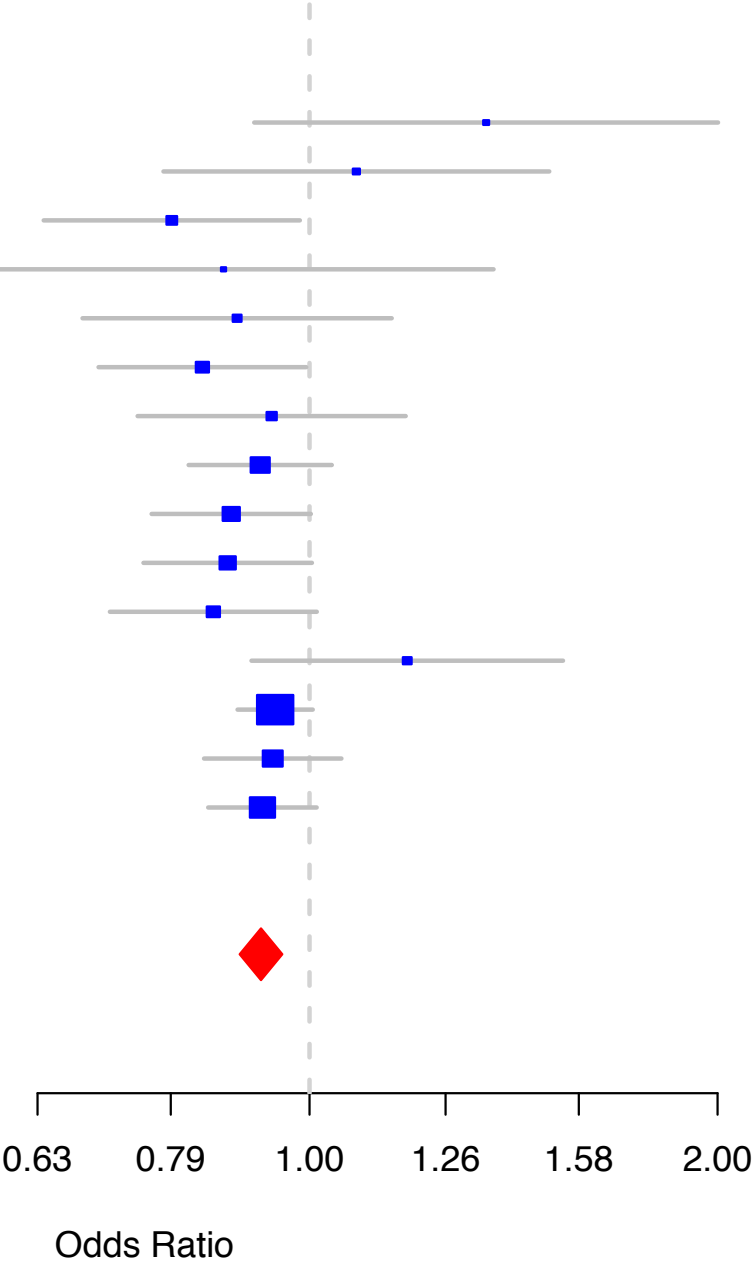

# rs60298754 MMP16 Known SNP

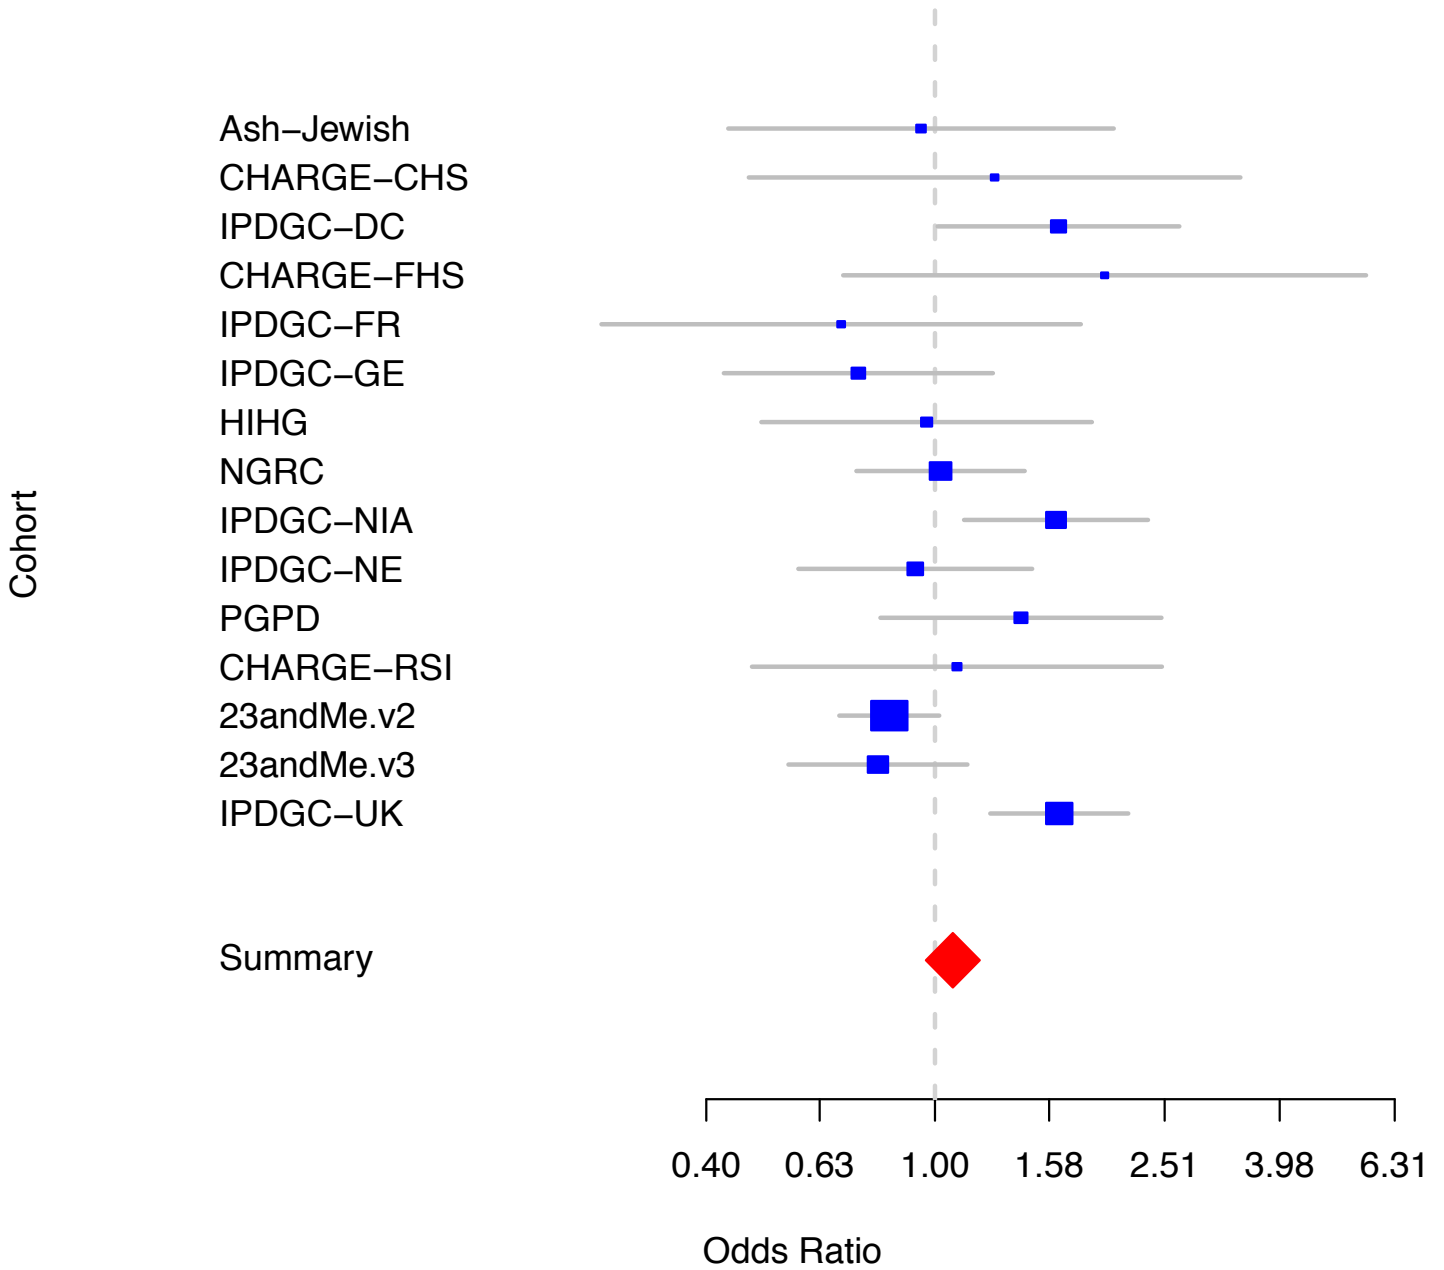

# rs7077361 ITGA8 Known SNP

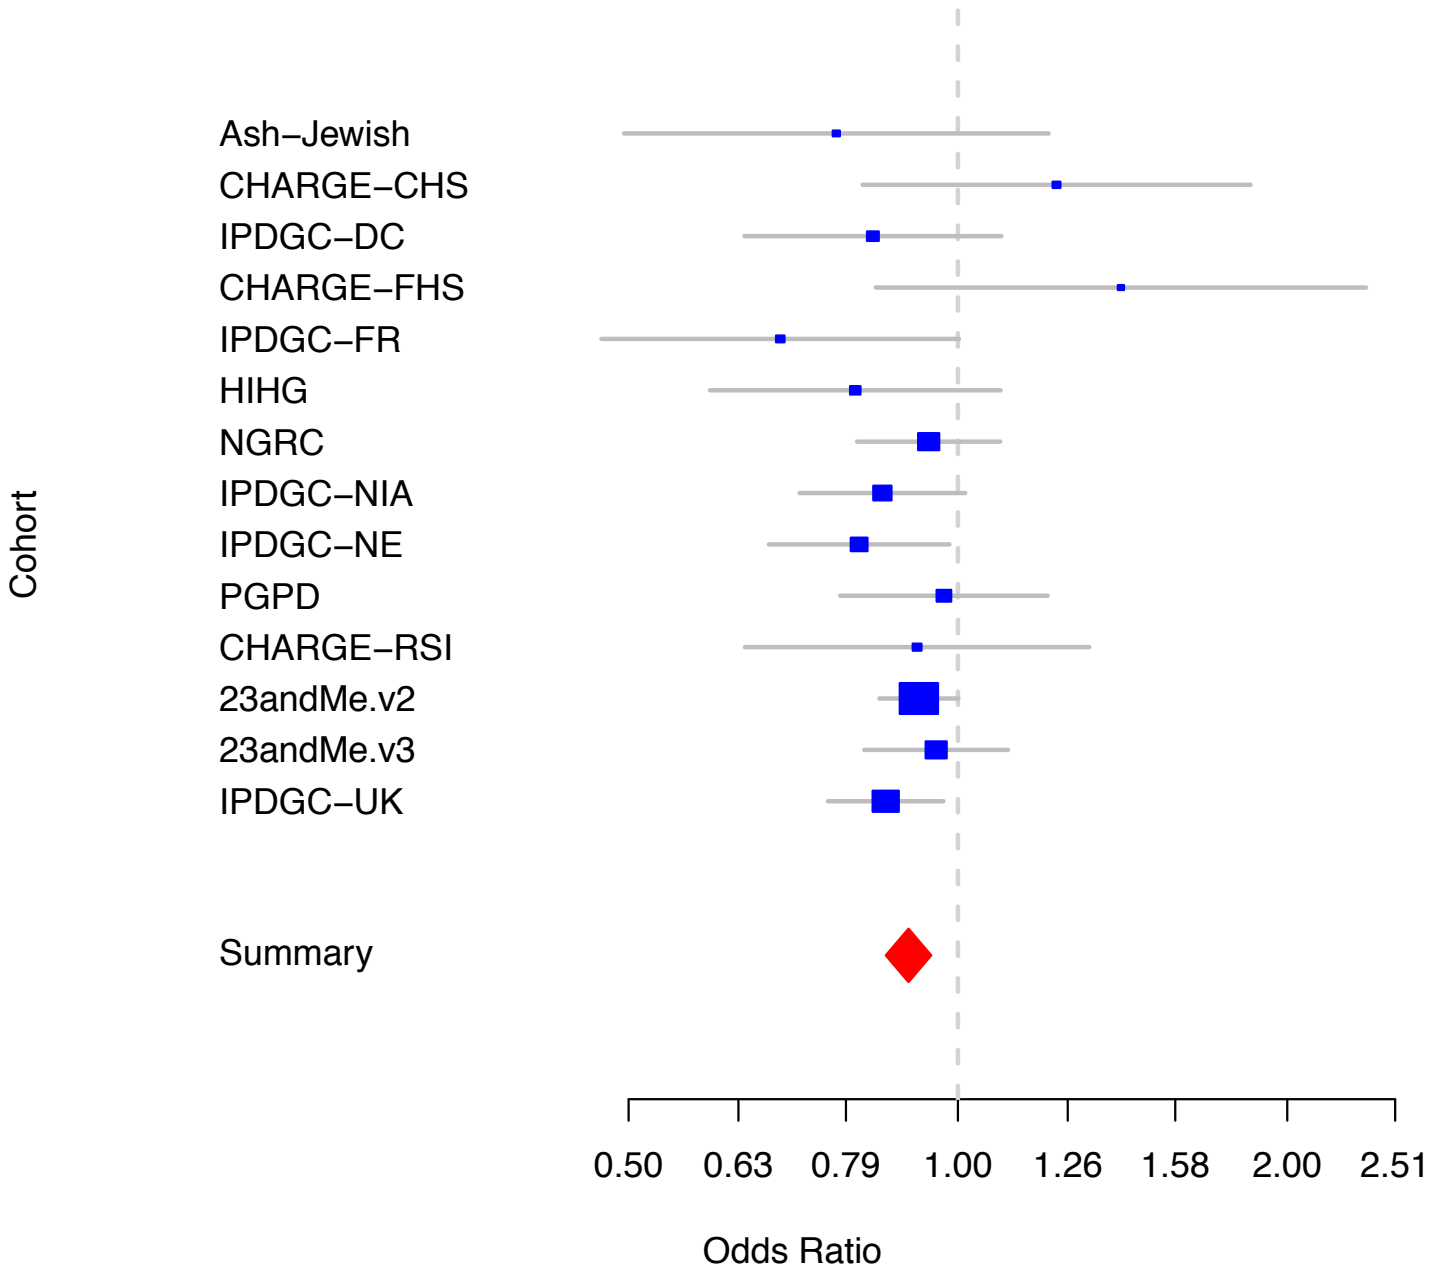

# rs11868035 SREBF/RAI1 Known SNP

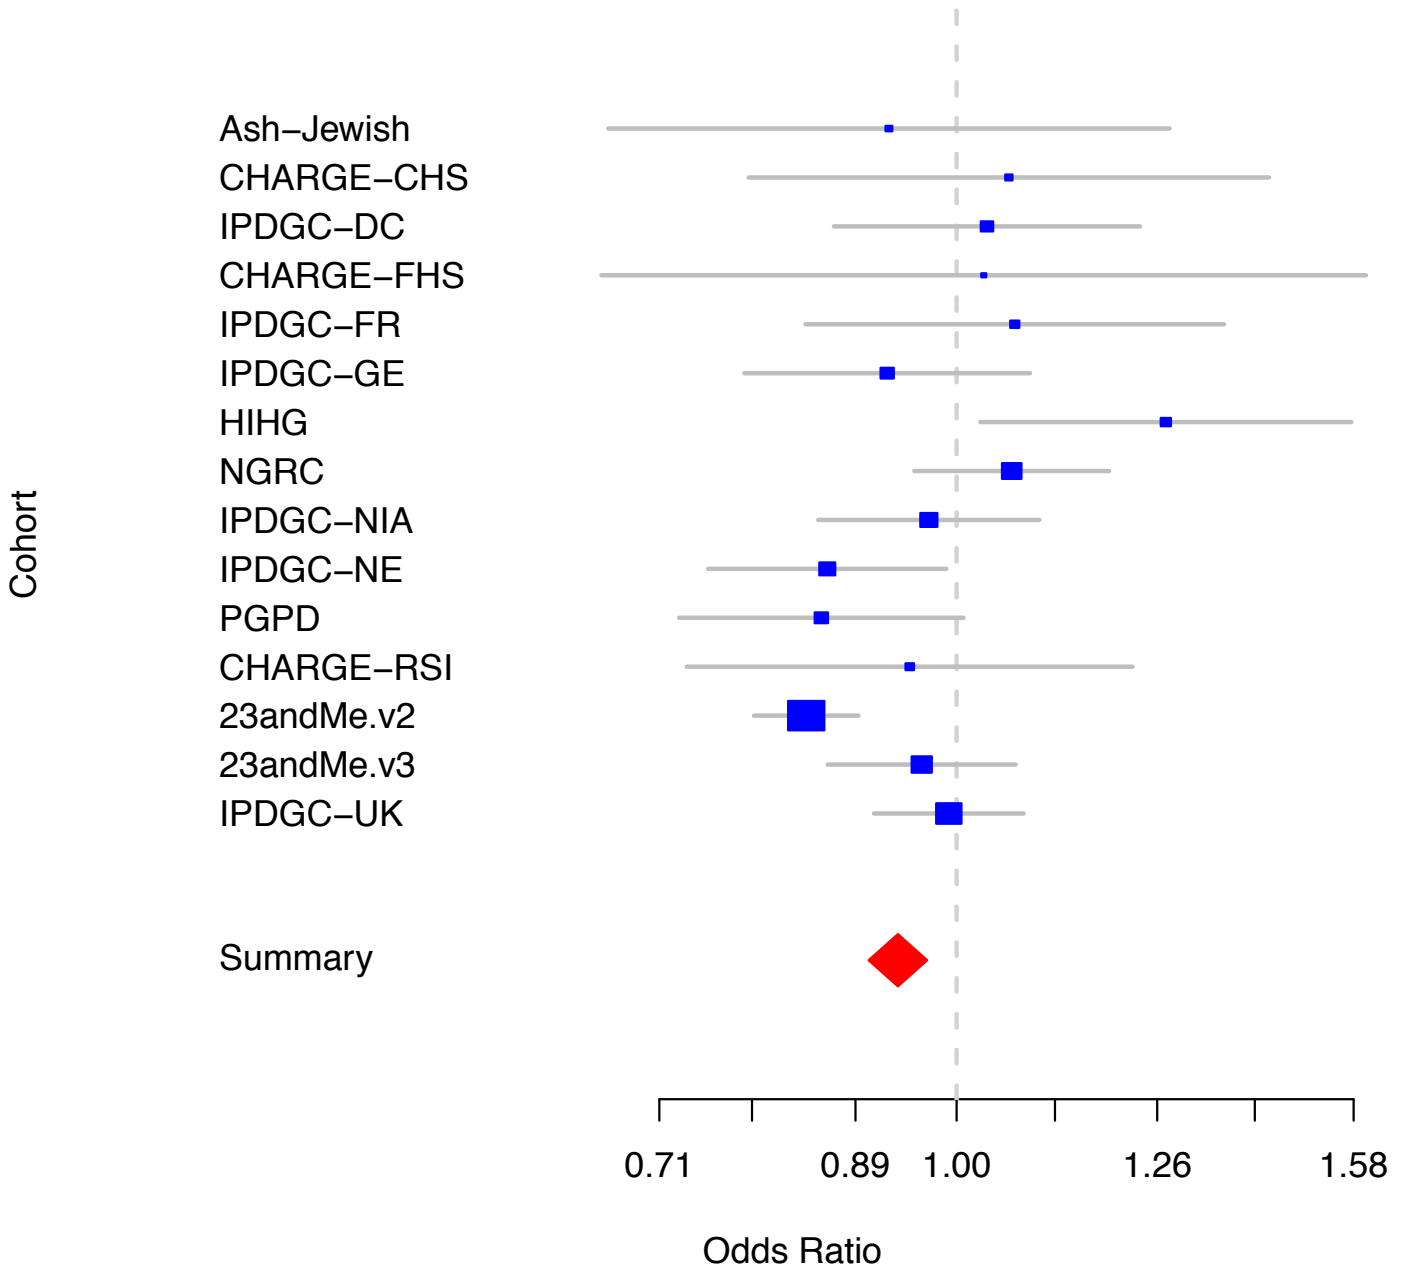

# rs2823357 USP25 Known SNP

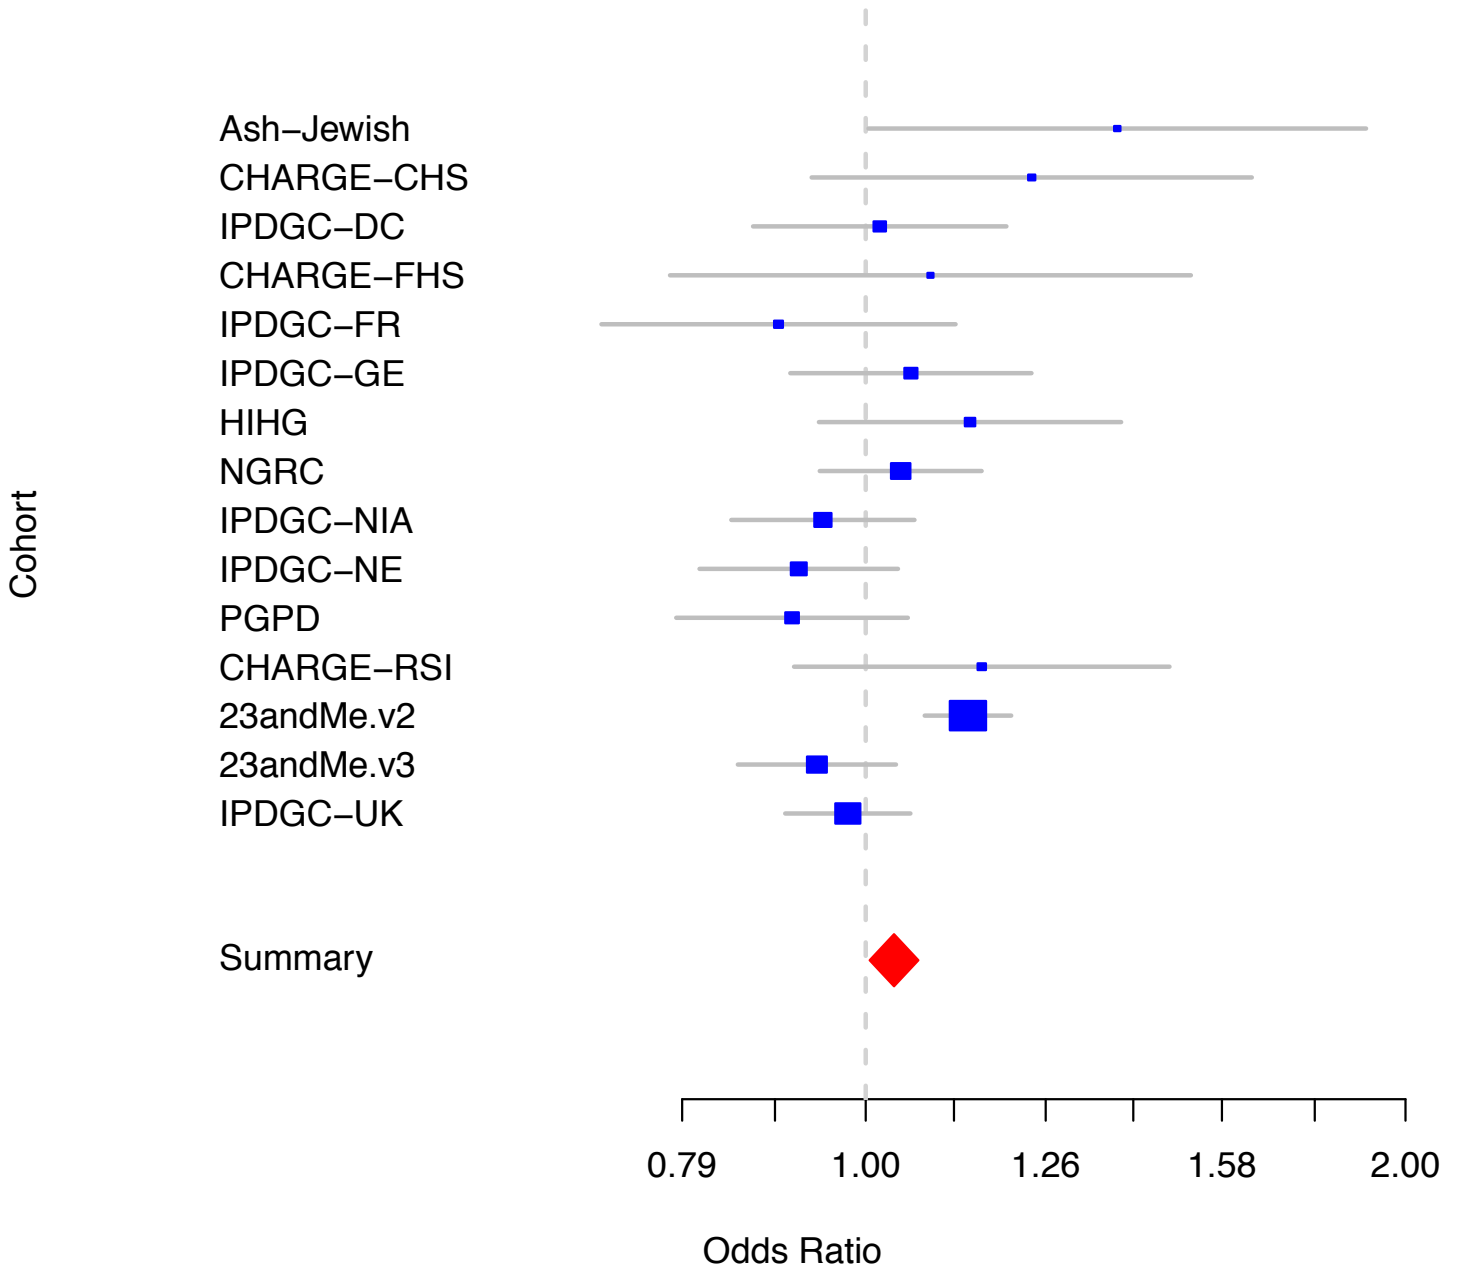

# rs79217002 MCCC1 Conditional SNP

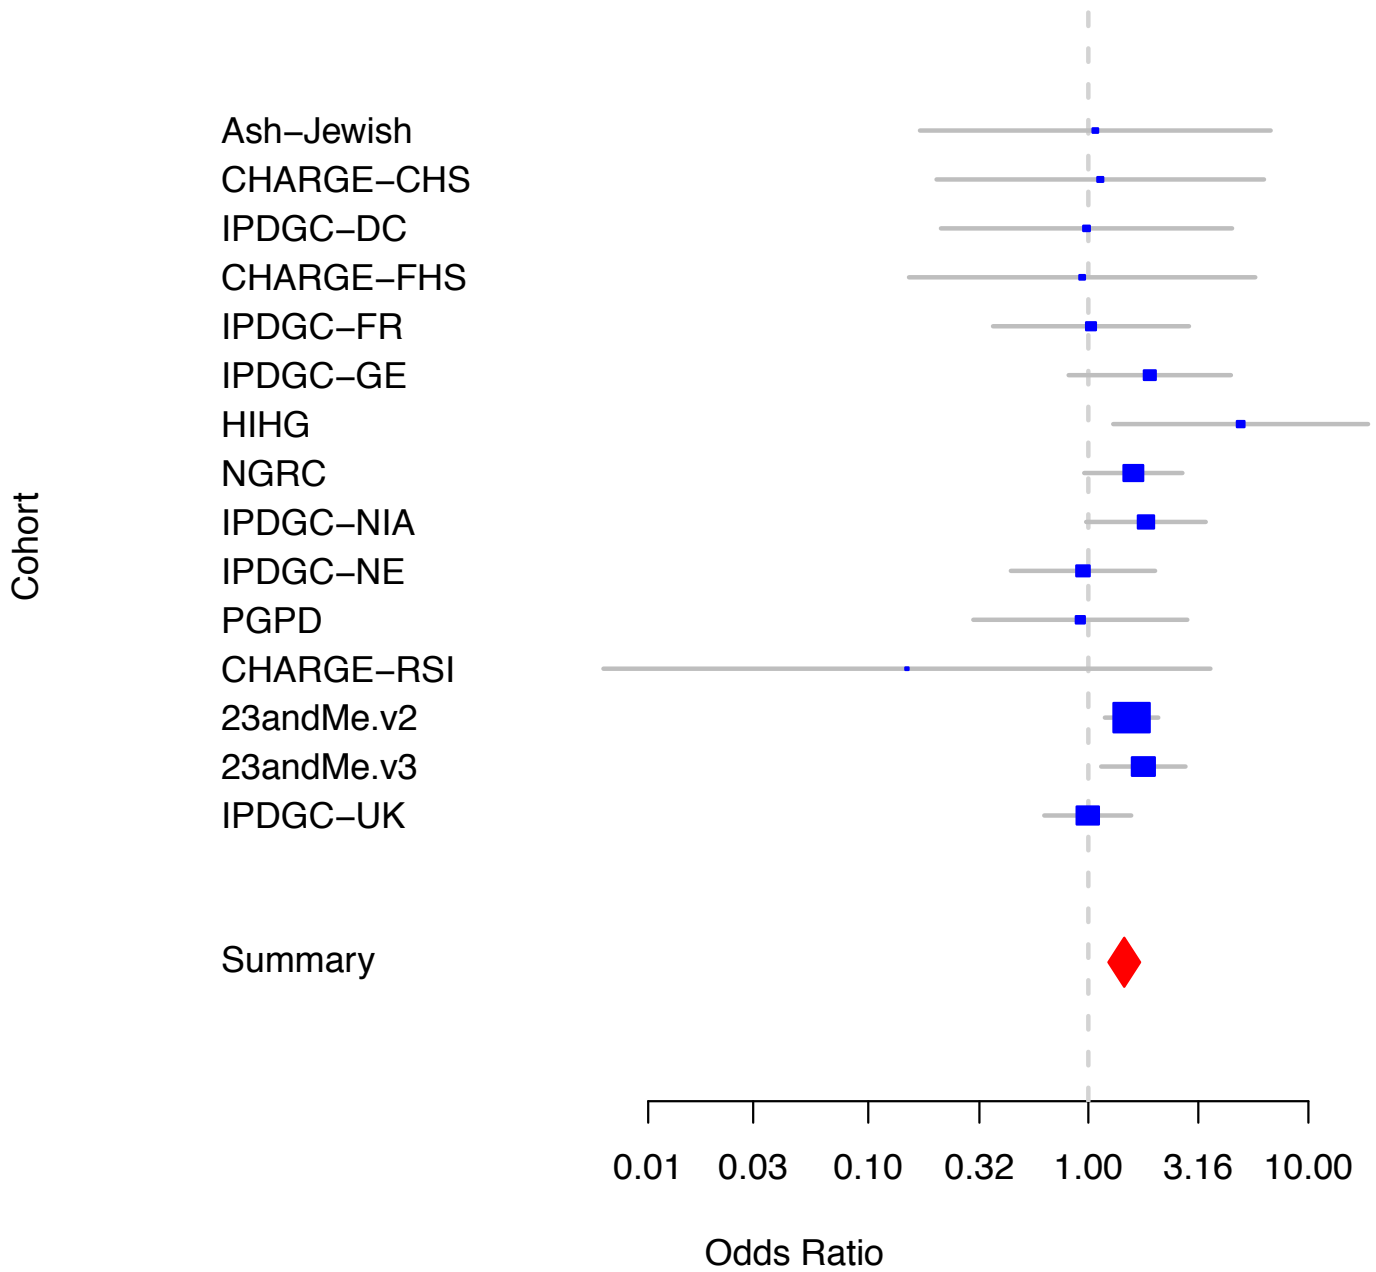



## rs114138760 GBA/SYT11 Conditional SNP

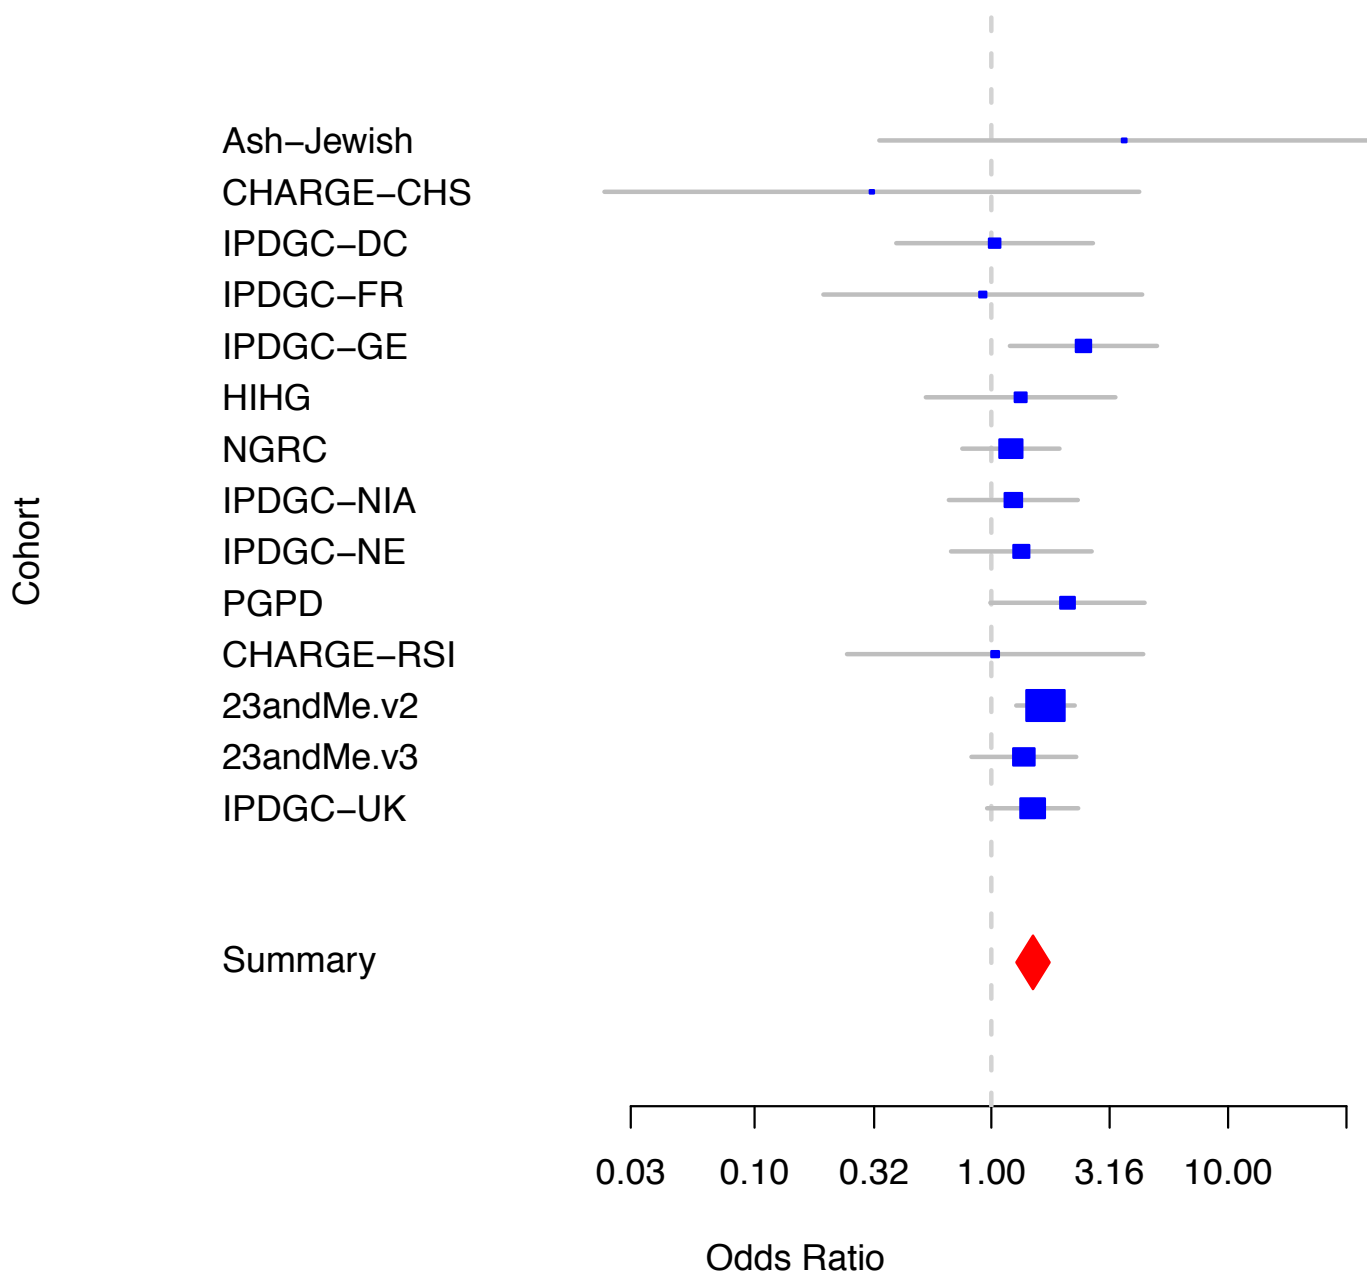

# rs34884217 TMEM175/GAK/DGKQ Conditional SNP

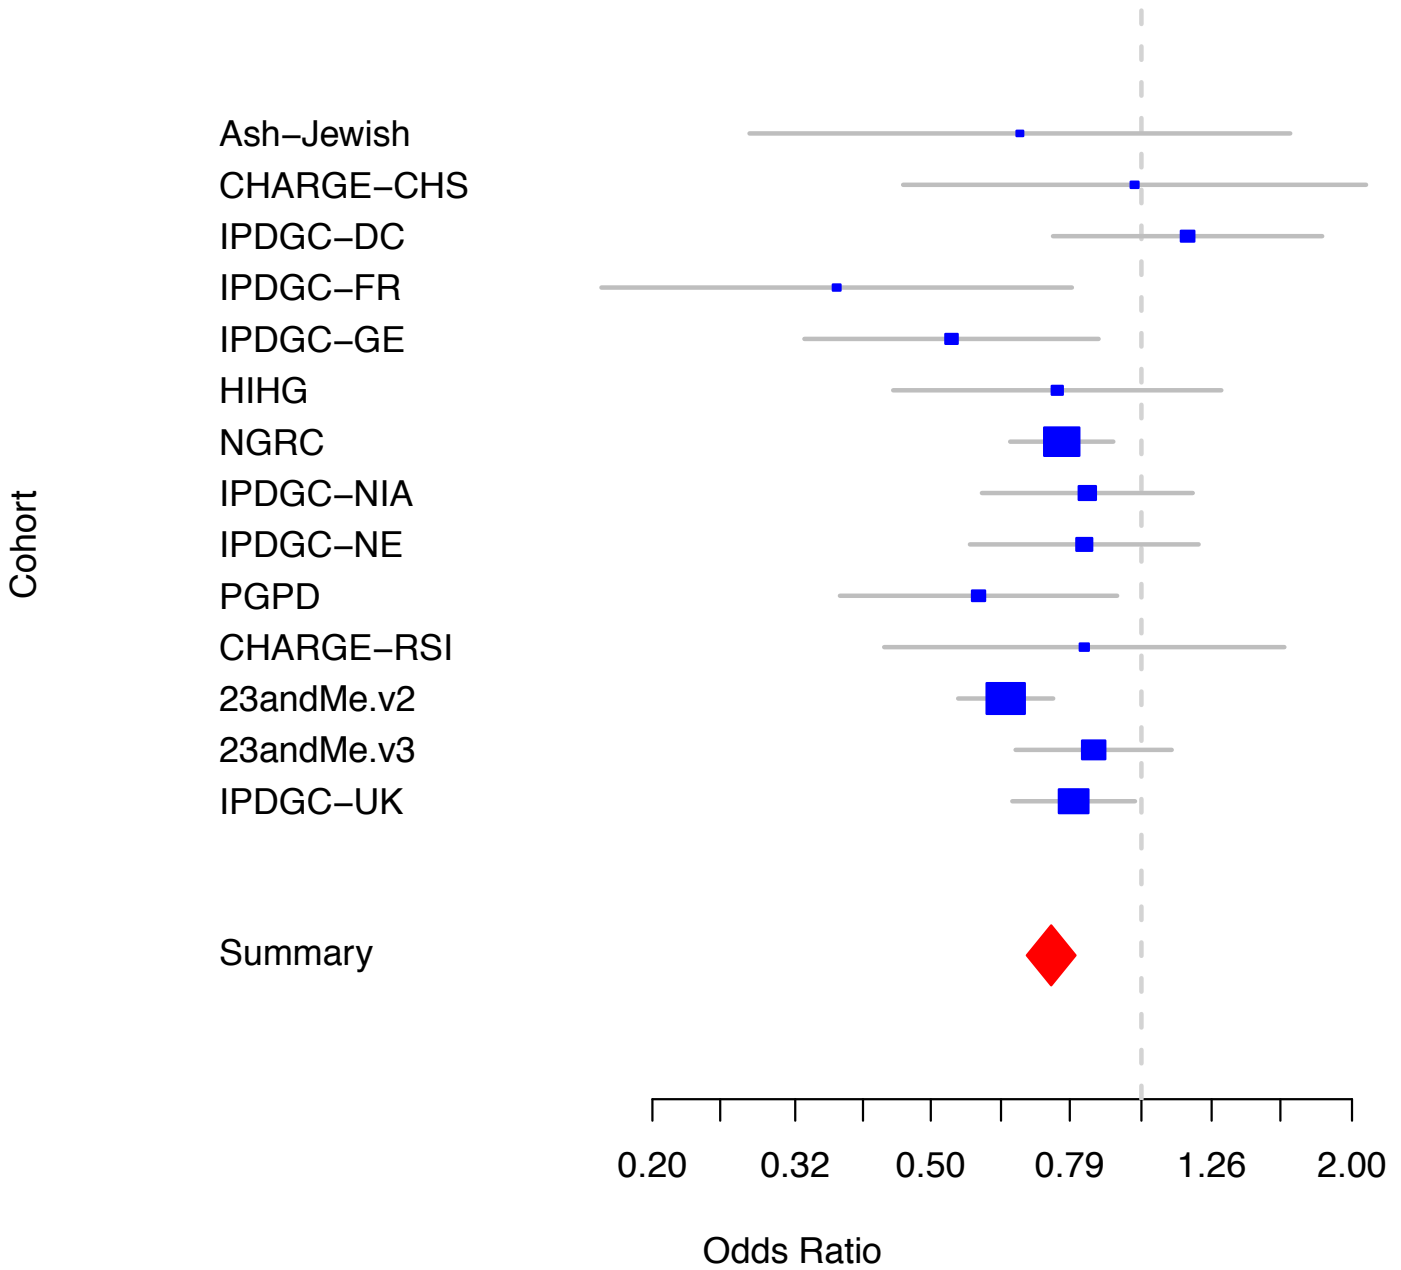

## rs1596117 FAM47E/SCARB2 Conditional SNP

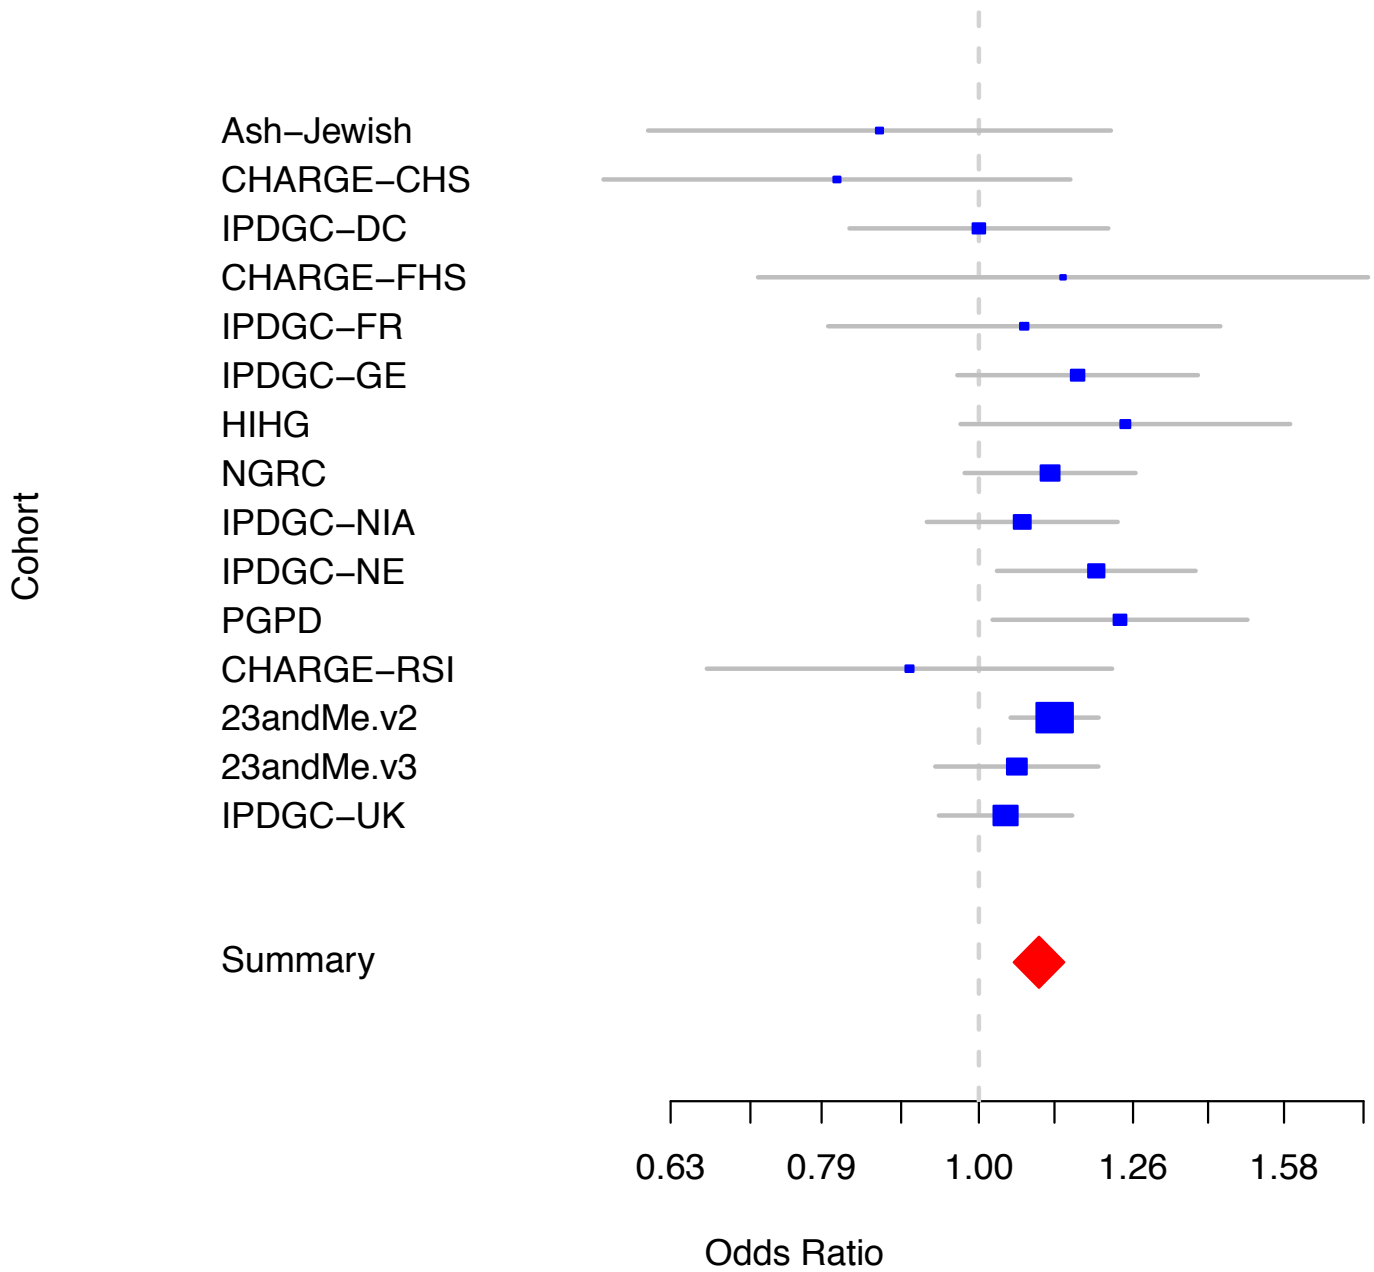

# rs7681154 SNCA Conditional SNP

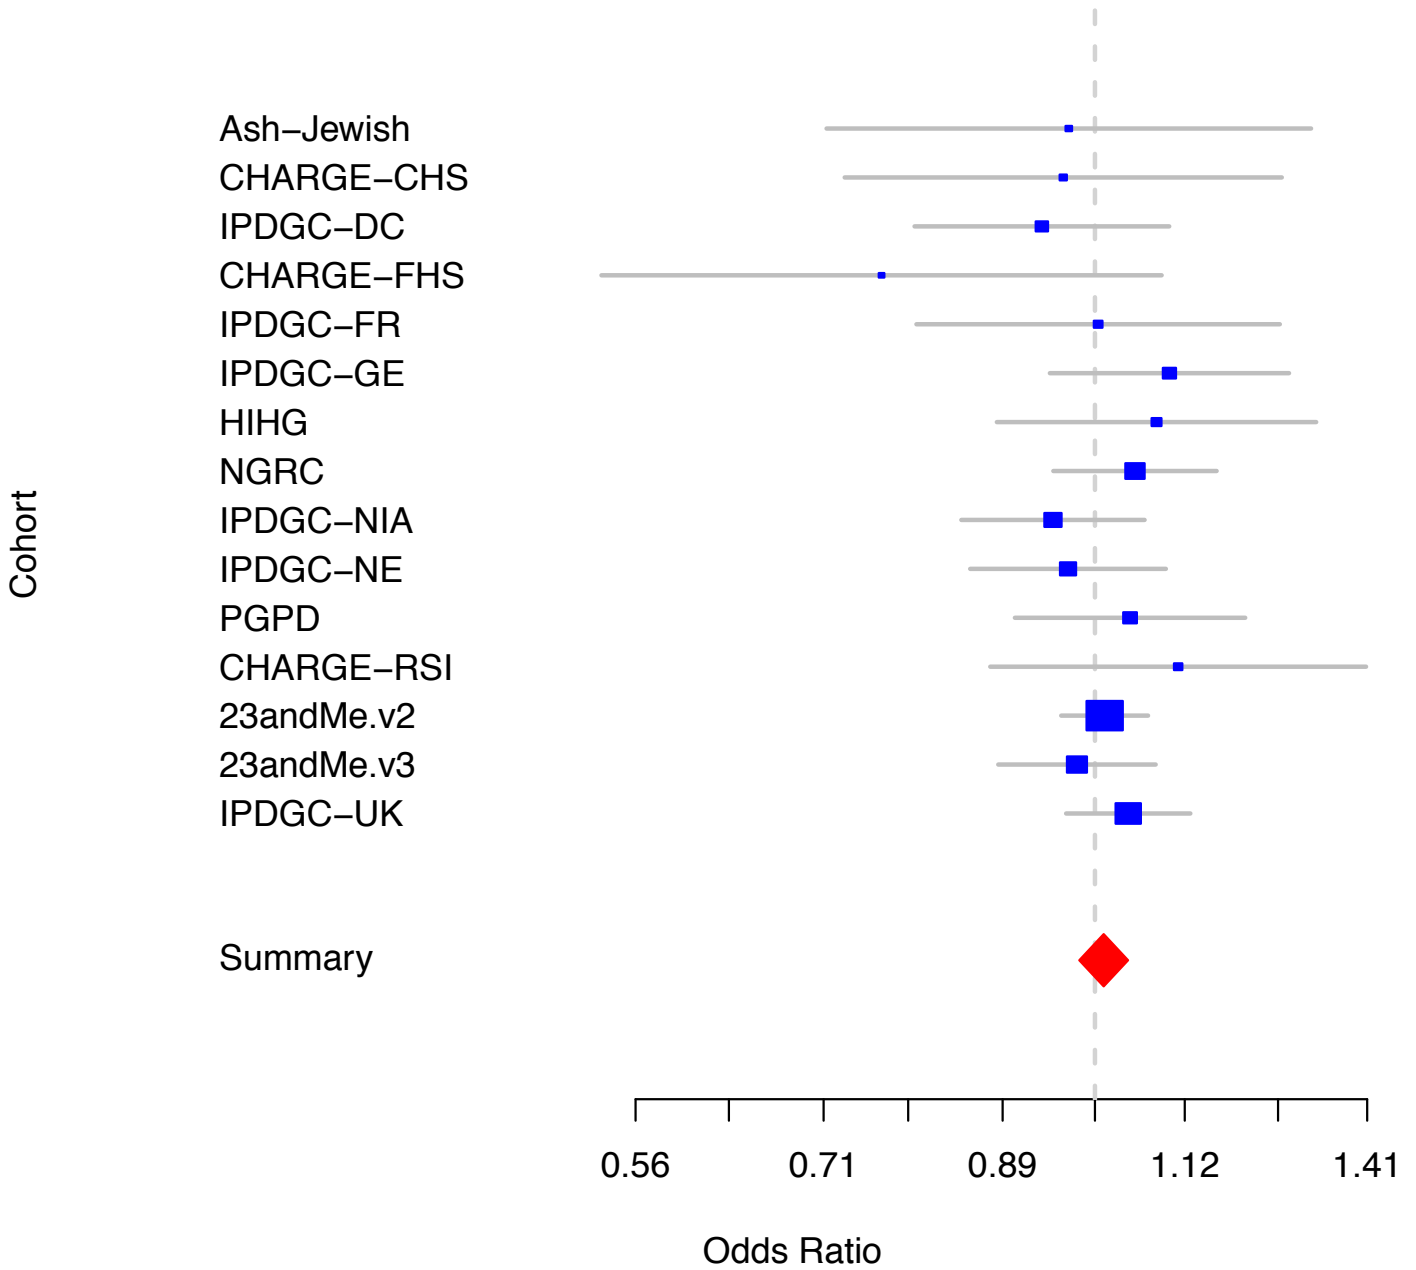

# rs10886515 INPP5F Conditional SNP

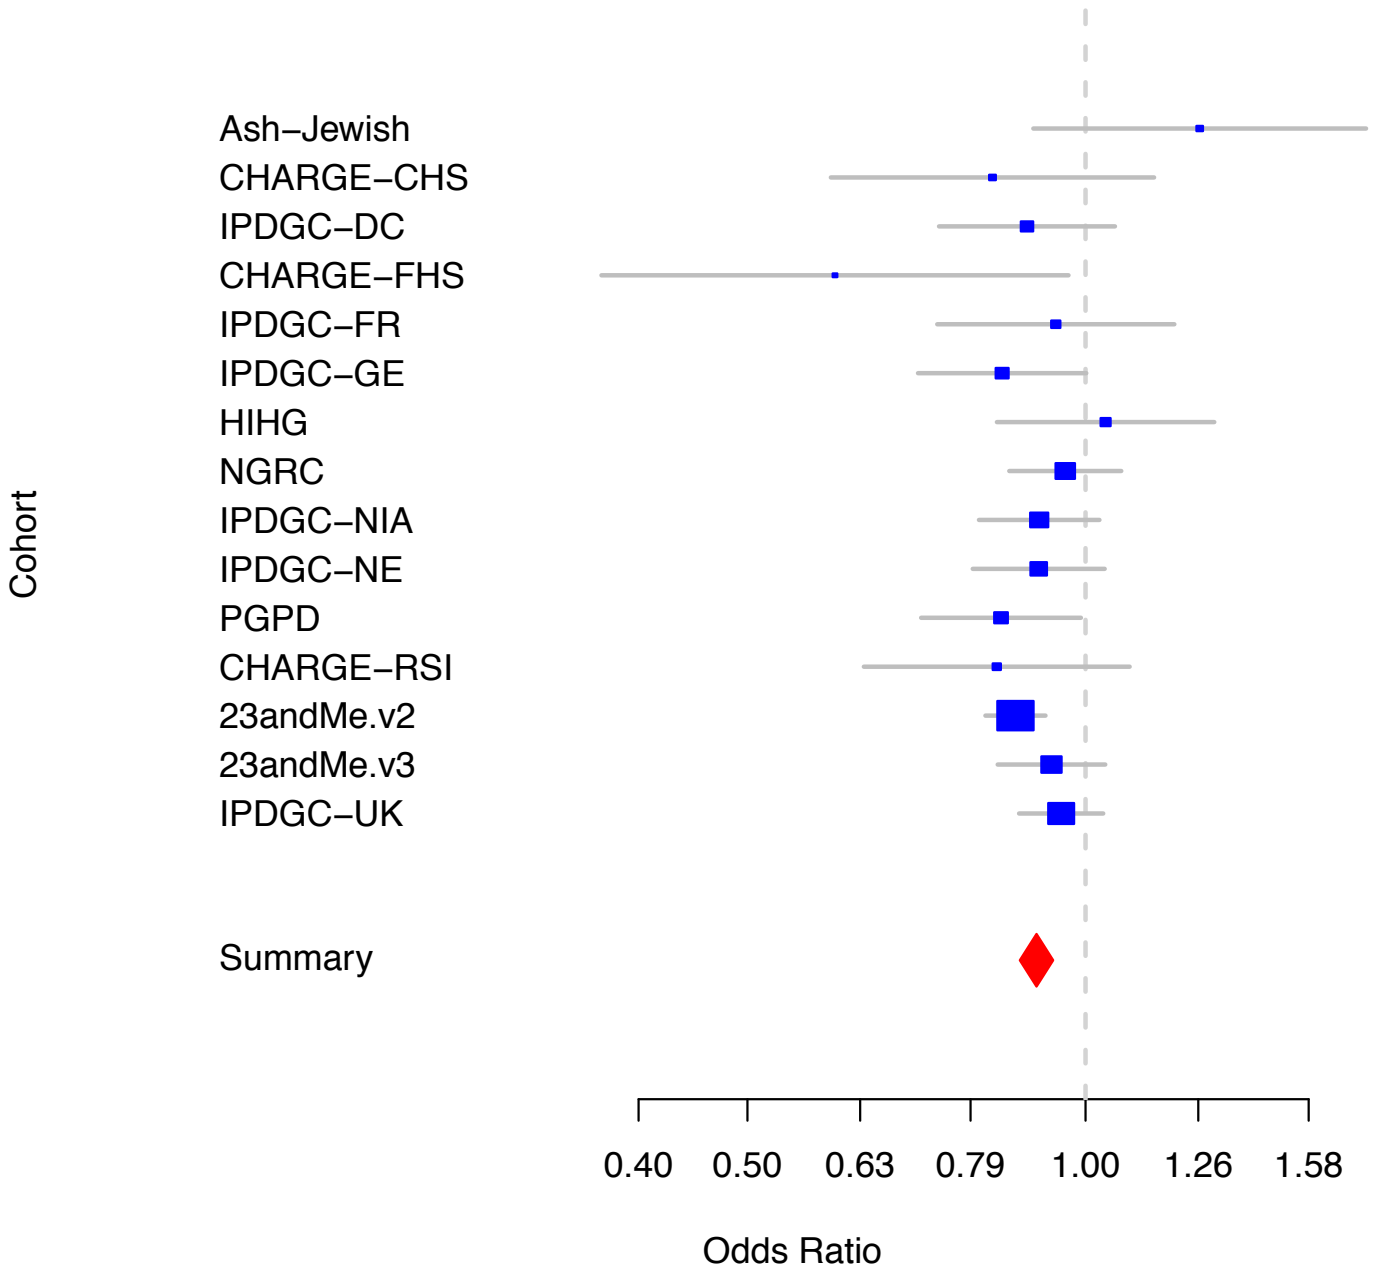

## rs13201101 HLA-DQB1 Conditional SNP

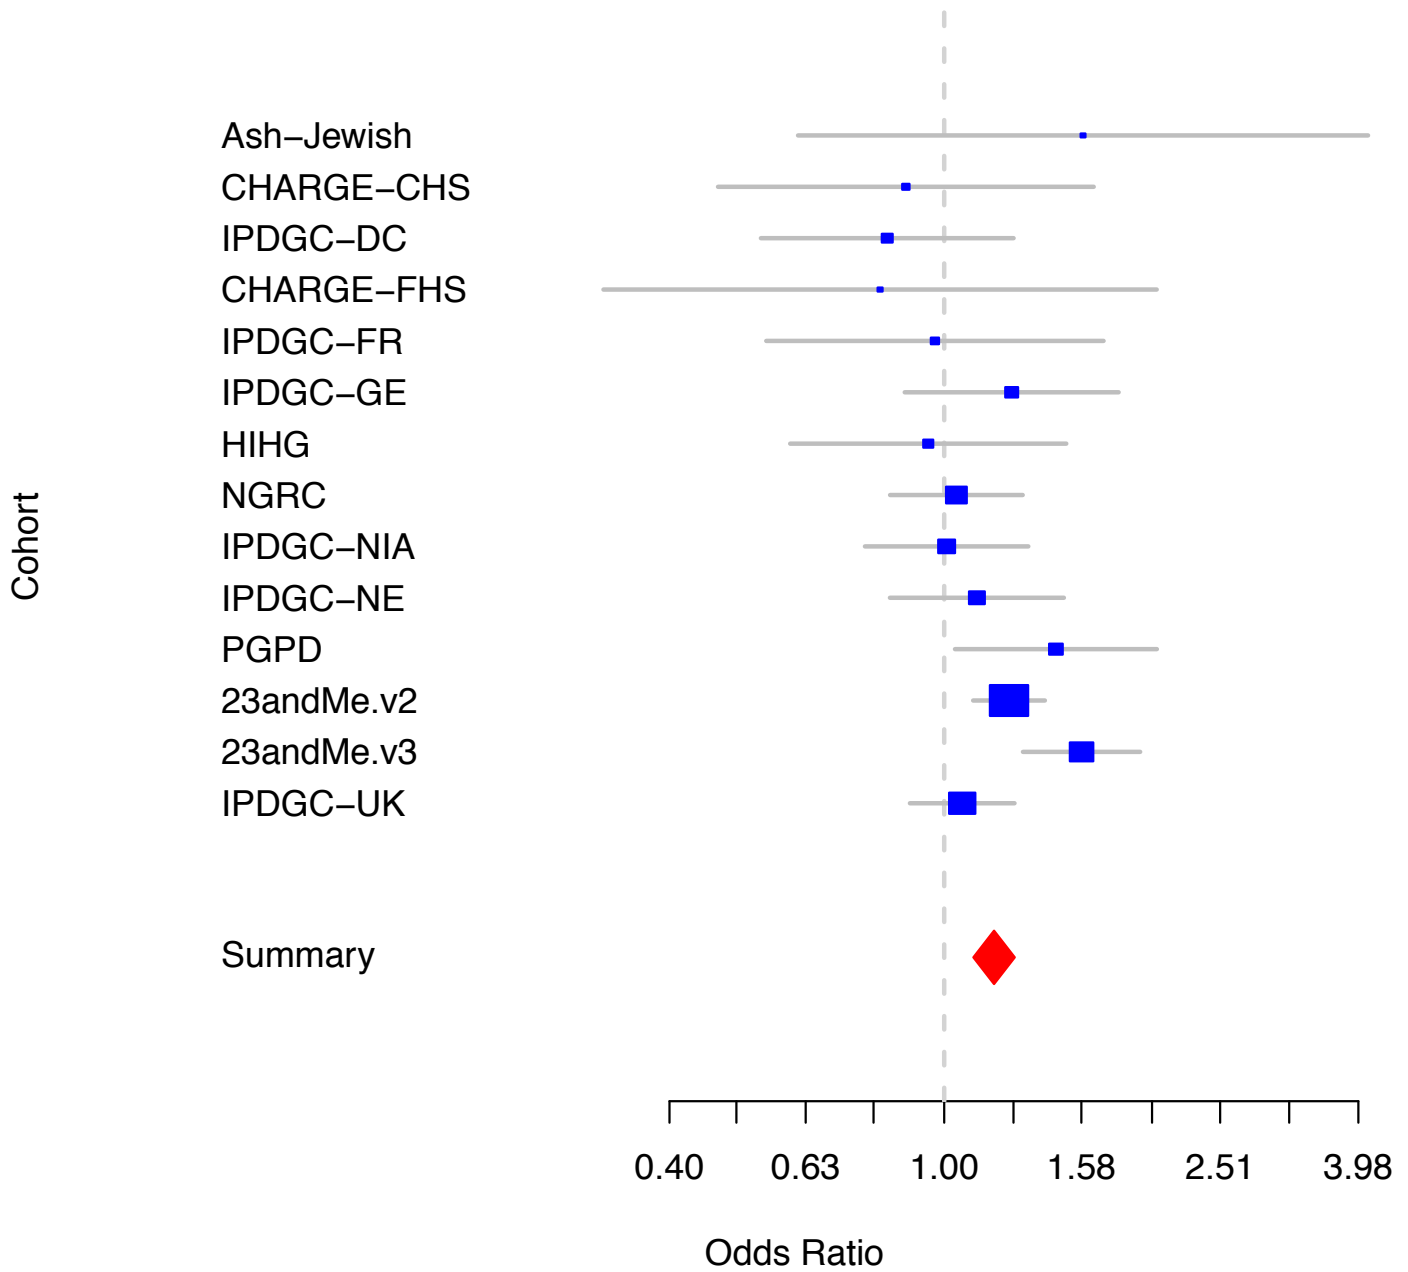

# rs117022814 SPPL2B Conditional SNP

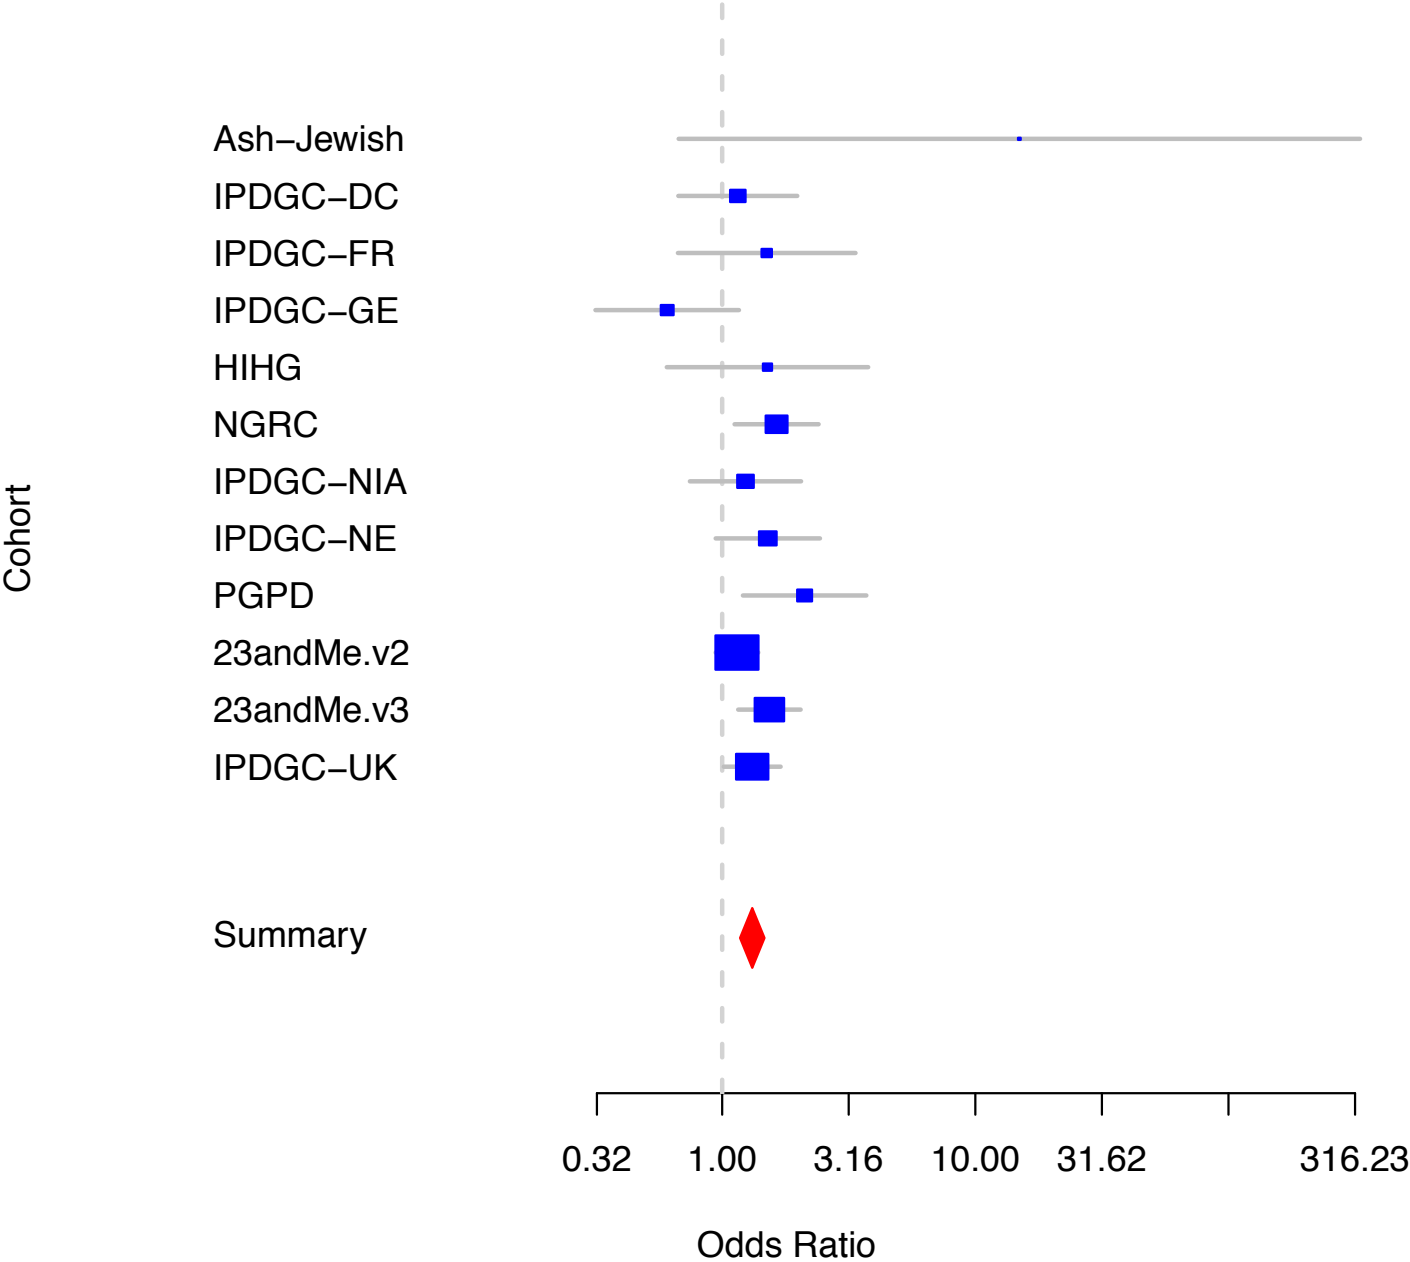

Supplementary Figure 3 (page 96):  
QQ plot of p-values from discovery  
meta-analysis.

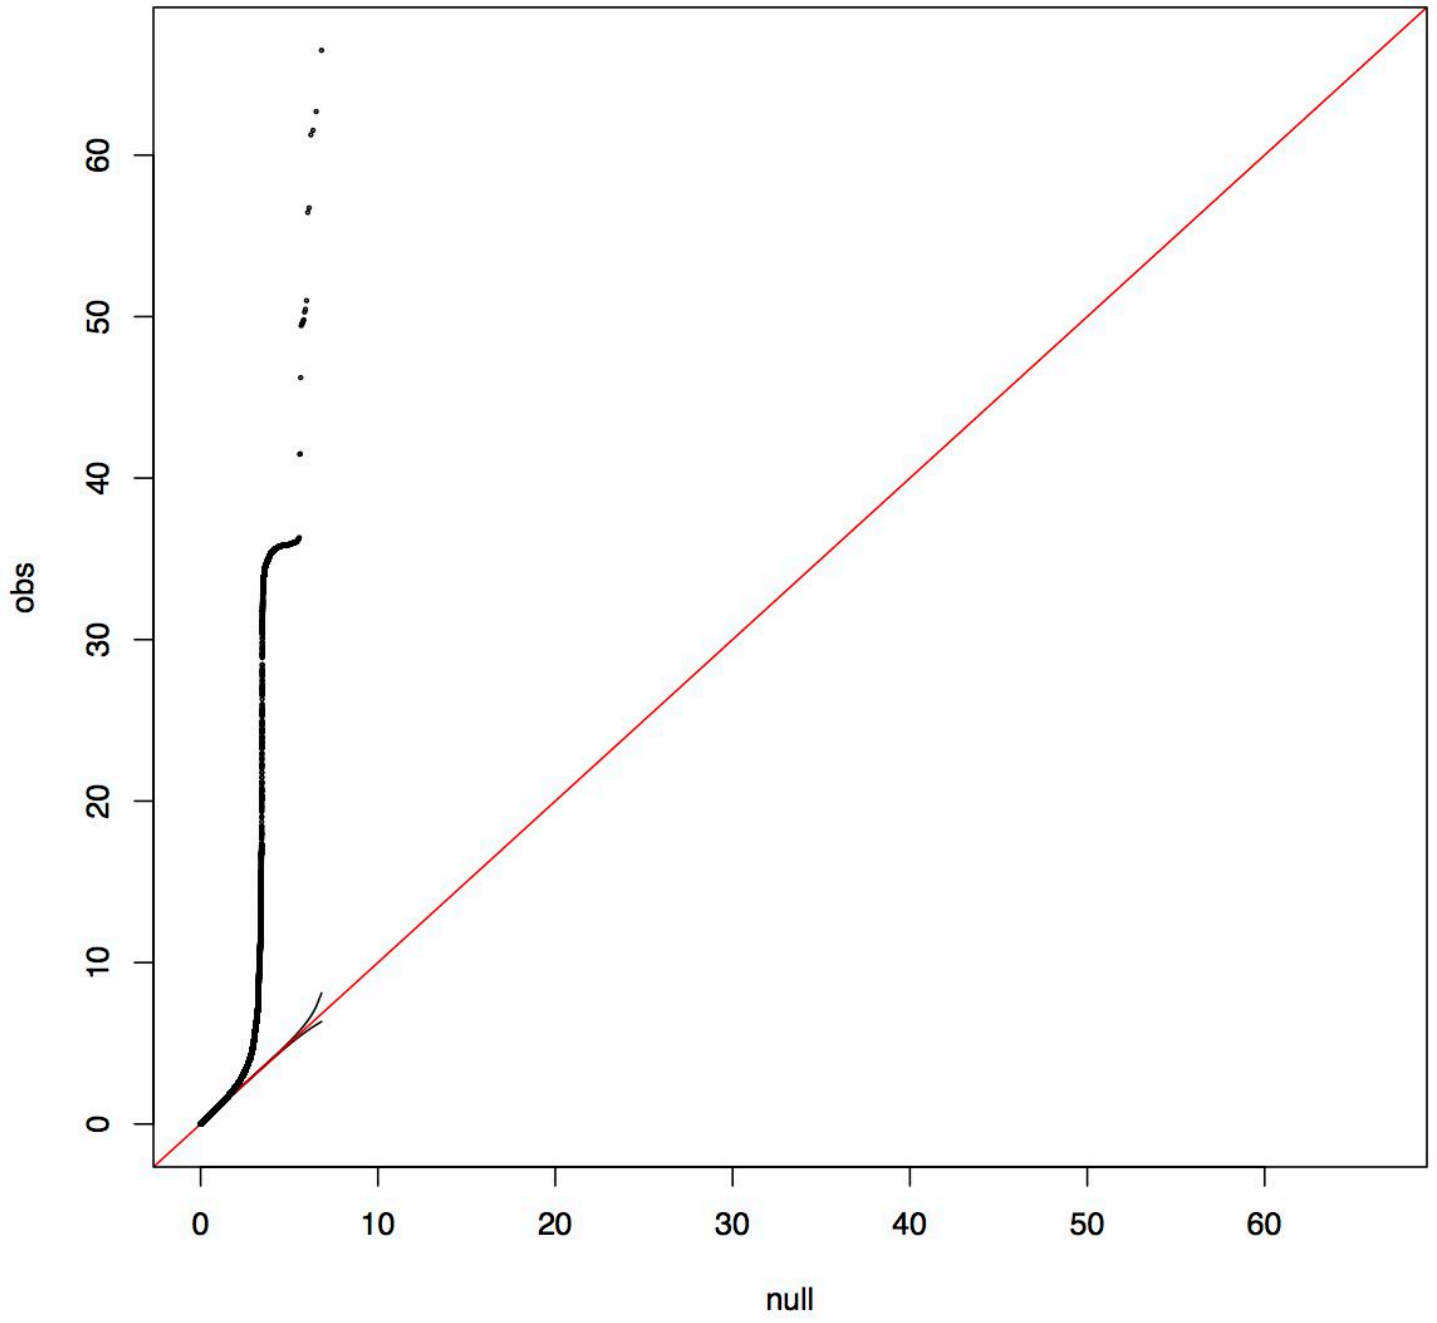



Supplementary Figure 4 (page 97):  
QQ plot of p-values from discovery  
meta-analysis excluding significant  
and replicated loci. All SNPs within  
+/- 1 megabase of a replicated  
genome-wide significant SNP were  
excluded (unadjusted lambda =  
1.045).

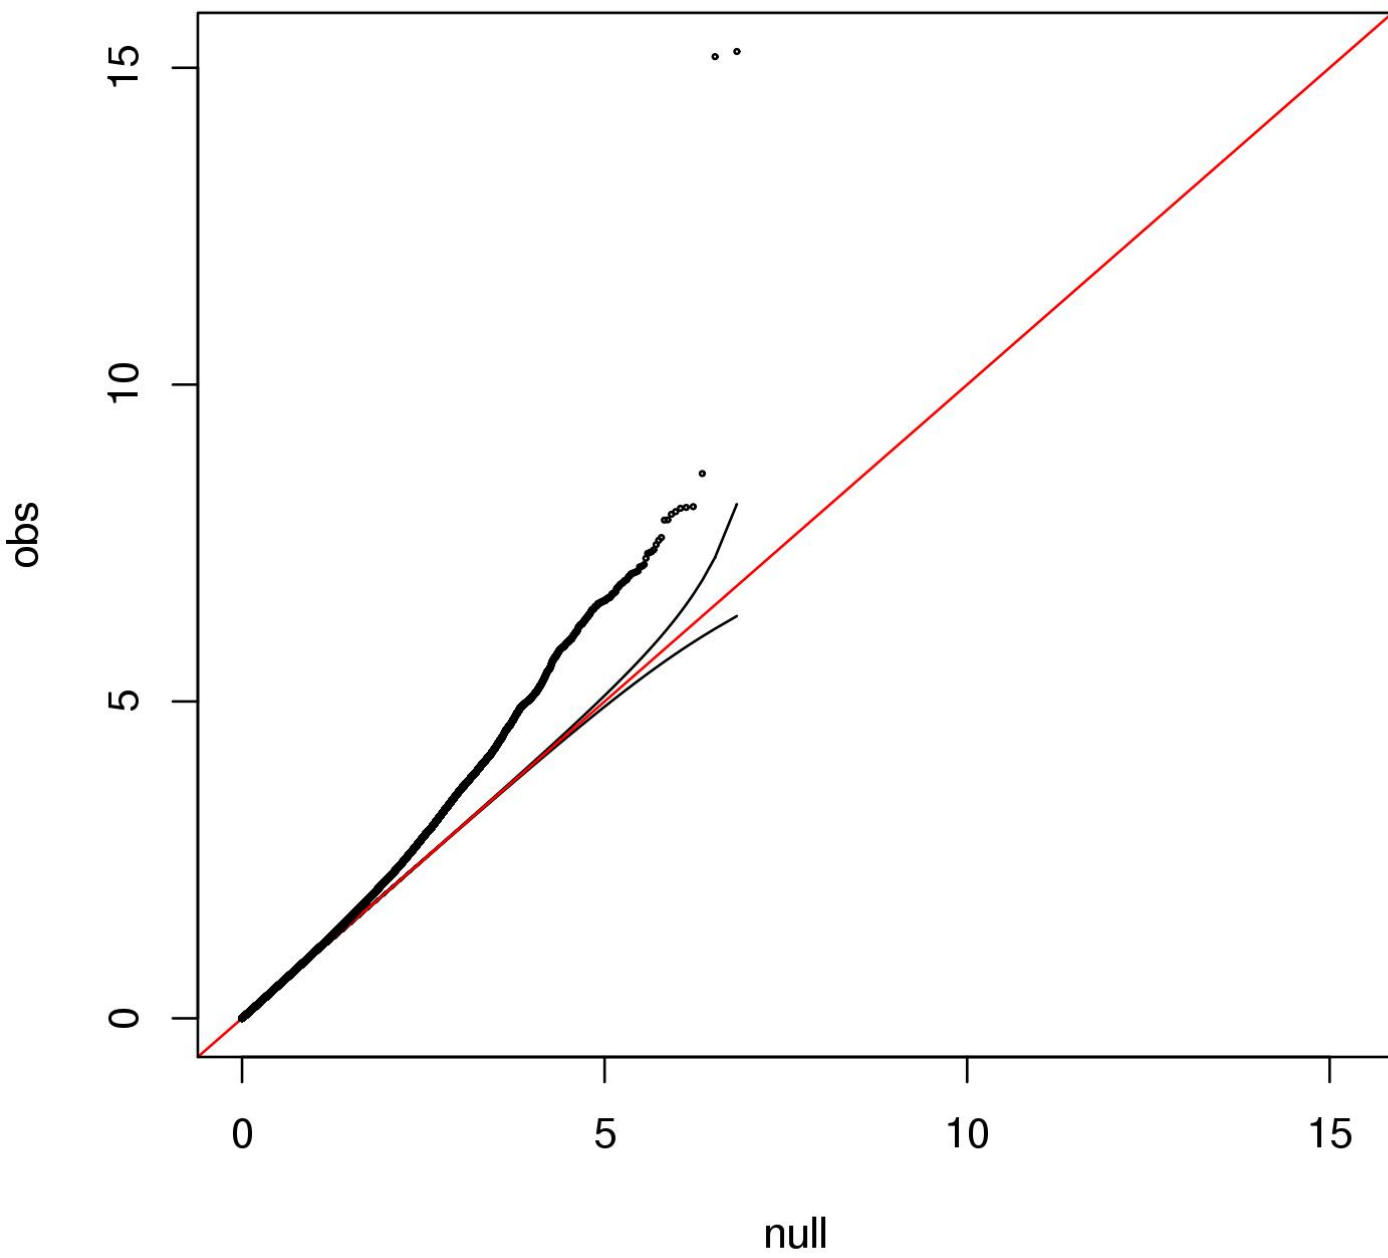

Supplementary Figure 5 (page 98): ROC curve for genetic risk profiles across cohorts adjusting for cohort membership, age and gender.

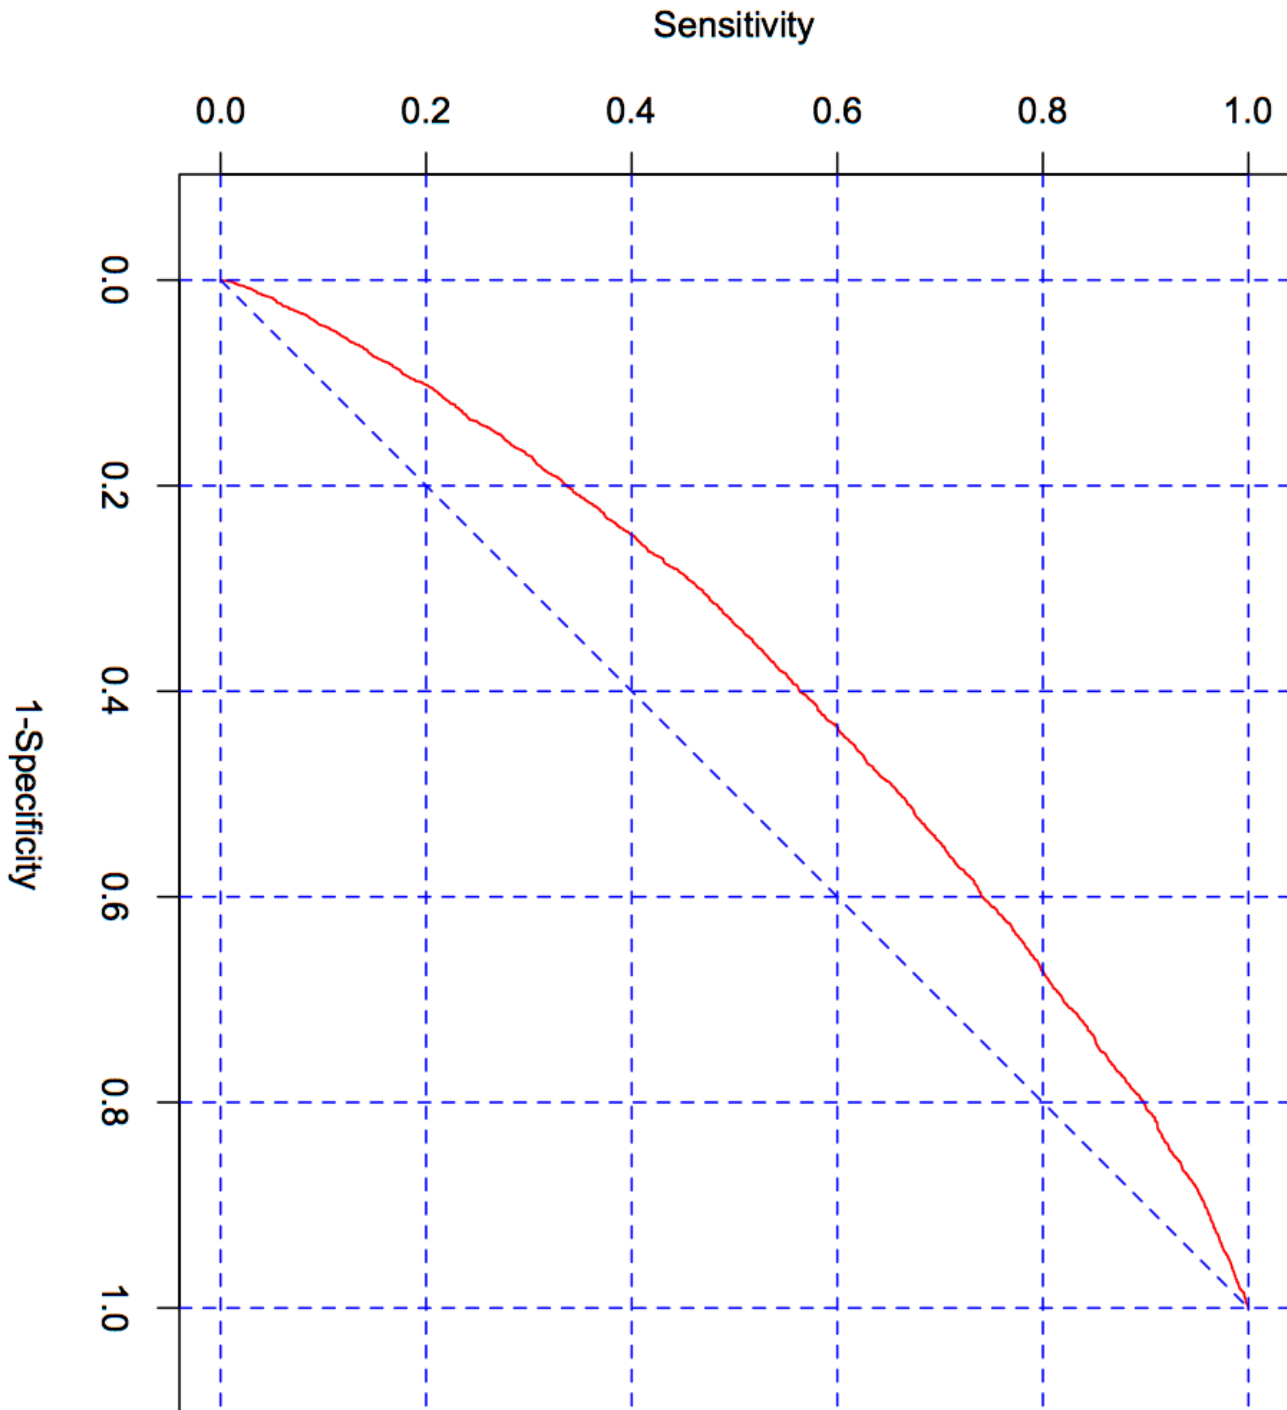

Supplement: NIHMS610183-supplement-1.pdf [file NIHMS610183-supplement-1.pdf]
